# Supplementary material for: Catalyst-controlled divergent transformations of N-sulfonyl-1,2,3-triazoles into isoquinolin-3-ones and 2-aminoindanones
Source: Royal Society of Chemistry journal article supplement (doi:10.1039/d1ob00708d), 2021-01-01

## Supporting Information

# Catalyst-Controlled Divergent Transformations of *N*-Sulfonyl-1,2,3-triazoles into Isoquinolin-3-ones and 2-Aminoindanones

Kyu Ree Lee<sup>†</sup>, Da Jung Jung<sup>†</sup>, Subin Ahn, Ji Won Kim, Sang-gi Lee\*

*Department of Chemistry and Nano Science, Ewha Womans University, Seoul 03760, Korea*

sanggi@ewha.ac.kr

### List of Contents

|                                                                                                             |     |
|-------------------------------------------------------------------------------------------------------------|-----|
| 1. General Information.....                                                                                 | S2  |
| 2. General Procedure of Substrate <b>1</b> and <b>1a-d</b> .....                                            | S2  |
| 3. Table S1. Optimization for the Synthesis of <b>5a</b> and <b>2a</b> via Rh(II)- and Pd(0)-Catalysis..... | S3  |
| 4. Table S2. Optimization for the Synthesis of <b>2a</b> Using Lewis Acid Catalyst.....                     | S4  |
| 5. Table S3. Optimization for the Synthesis of <b>3a</b> via Tandem One-Pot Rh(II)/Pd(0) Catalysis.....     | S5  |
| 6. All in One-Pot Rh(II)/Pd(0) Catalysis of <b>1a</b> for the Synthesis of <b>3a</b> .....                  | S5  |
| 7. General Procedure for the Synthesis of <b>2</b> .....                                                    | S6  |
| 8. General Procedure for Synthesis of <b>3</b> .....                                                        | S6  |
| 9. General Procedure for Tandem Synthesis of <b>3a</b> .....                                                | S6  |
| 10. Deuterium Labeling Experiment.....                                                                      | S7  |
| 11. Characterization Data.....                                                                              | S9  |
| 12. X-ray Crystal Structure and Data of <b>2a</b> .....                                                     | S16 |
| 13. X-ray Crystal Structure and Data of <b>3a</b> .....                                                     | S17 |
| 14. Copies of <sup>1</sup> H and <sup>13</sup> C NMR Spectra.....                                           | S18 |

## 1. General Information.

All reactions were performed under an argon atmosphere using standard Schelenk techniques. Reaction flasks were flame-dried under vacuum. All purchased reagents were used without further purification. Dry toluene was distilled prior to be used. Anhydrous solvent was transferred by an oven dried syringe of a cannula. All reactions were monitored by TLC with silica gel coated plates. Visualization on TLC was achieved by use of UV light (254 nm) or by staining with Cerium Ammonium Molybdate (CAM). NMR spectra were recorded on a Bruker 300 MHz for  $^1\text{H}$ , 75.5 MHz for  $^{13}\text{C}$ , and 282 MHz for  $^{19}\text{F}$ . The melting points were measured on a Fisher-Johns apparatus and uncorrected. HRMS, high resolution mass spectra were obtained by electron ionization (EI), fast atom bombardment (FAB) with a magnetic sector-electronic sector double focusing mass analyzer at the Daegu Center of the Korea Basic Science Institute.

## 2. General Procedure of Substrate **1** and **1a-d**.

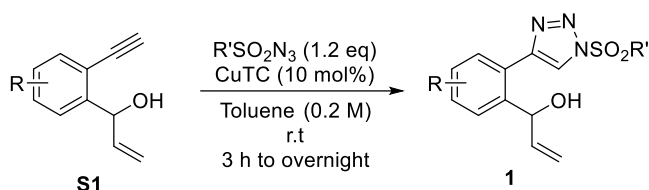

The compound **S1** was prepared according to the literature procedures.<sup>1</sup> The substrate **1** was prepared according to the general *N*-sulfonyl-1,2,3-triazole synthesis.<sup>2</sup> (*Note.* The compound **1** should be stored at low temperatures, otherwise it would decompose as it turns green. Also, the catalytic reactivity of the starting material **1** decreases over time, therefore it must be used within a week after synthesis.)

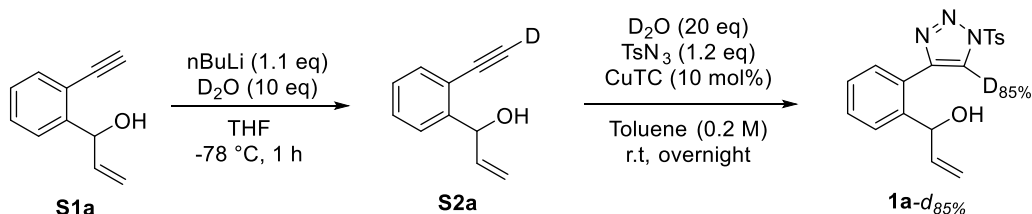

Under a nitrogen atmosphere, to a solution of dry THF (0.2 M) in a flame-dried round bottom flask was added acetylene **S1a** (1 equiv.) and stirred at -78 °C then added nBuLi (1.6 M in hexane, 1.1 equiv.) dropwise. The reaction mixture was stirred for an hour, then diluted with Et<sub>2</sub>O and quenched with D<sub>2</sub>O (10 equiv.). The resulting suspension was dried over MgSO<sub>4</sub> and filtered. The residue was concentrated under reduced pressure to afford compound **S2**.

**1a-d** was prepared from **S2a** according to the ref. (2) with additional D<sub>2</sub>O (20 equiv.).

### Reference

- (1) M. Rosillo, G. Domínguez, L. Casarrubios, U. Amador and J. Pérez-Castells, Tandem Enyne Methathesis-Diels-Alder Reaction for Construction of Natural Product Frameworks. *J. Org. Chem.* 2004, **69**, 2084-2093.
- (2) J. Raushel and V. V. Fokin, Efficient Synthesis of 1-Sulfonyl-1,2,3-Triazoles. *Org. Lett.* 2010, **12**, 4952-4955.

### 3. Table S1. Optimization for the Synthesis of **5a** and **2a** via Rh(II)- and Pd(0)-Catalysis.

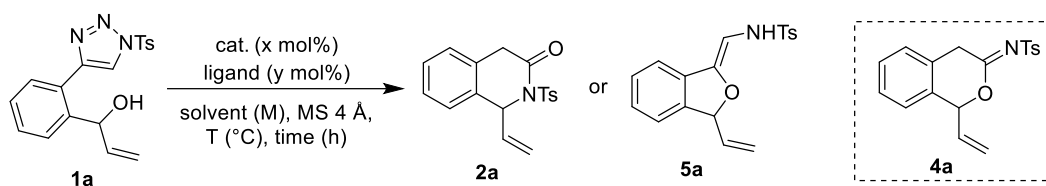

In a glovebox, a flame-dried vial equipped with a stirrer bar was charged with triazole **1a** (0.2 mmol), catalyst, 4 Å molecular sieves and sealed under an argon atmosphere. A solvent was added to the mixture and the solution was heated until all triazole was consumed (determined by TLC analysis). After being cooled to room temperature, the solvent was evaporated, dried under vacuum, and determined the product ratio from crude <sup>1</sup>H NMR spectrum. The product was purified by silica-gel column chromatography. (*Note.* <sup>1</sup>H NMR analysis should be conducted immediately after completion of the reaction, since compound **5a** was readily decomposed in one day even at -20 °C.)

| Entry | Rh Catalyst (mol%)                        | Pd Catalyst (mol%)                     | Ligand (mol%)                          | Solvent (M)        | T (°C) /time (h) <sup>b</sup> | Yield (%) <sup>c</sup> | <b>2a</b> : <b>5a</b> ratio <sup>d</sup> |
|-------|-------------------------------------------|----------------------------------------|----------------------------------------|--------------------|-------------------------------|------------------------|------------------------------------------|
| 1     | Rh <sub>2</sub> (TMA) <sub>4</sub> (2)    | Pd(PPh <sub>3</sub> ) <sub>4</sub> (2) | -                                      | Toluene (0.2)      | 90 / 21                       | 31                     | 99>1                                     |
| 2     | Rh <sub>2</sub> (TMA) <sub>4</sub> (3)    | Pd <sub>2</sub> (dba) <sub>3</sub> (1) | Dppp (2)                               | Toluene (0.2)      | 120 / 1                       | 53                     | 1.63:1                                   |
| 3     | Rh <sub>2</sub> (TMA) <sub>4</sub> (2)    | -                                      | -                                      | Toluene (0.2)      | 90 / 2                        | 75                     | 1:9                                      |
| 4     | Rh <sub>2</sub> (TMA) <sub>4</sub> (2)    | -                                      | -                                      | Toluene (0.2)      | <80                           | N.R.                   | -                                        |
| 5     | Rh <sub>2</sub> (TMA) <sub>4</sub> (2)    | -                                      | -                                      | 1,2-DCE (0.2)      | 90 / 2                        | 64                     | 1:10                                     |
| 6     | Rh <sub>2</sub> (TMA) <sub>4</sub> (2)    | -                                      | -                                      | PhCl (0.2)         | 90 / 3                        | 69                     | 1:5                                      |
| 7     | Rh <sub>2</sub> (TMA) <sub>4</sub> (2)    | -                                      | -                                      | MeCN (0.2)         | 90 / 7                        | 13                     | 3.7:1                                    |
| 8     | Rh <sub>2</sub> (TMA) <sub>4</sub> (2)    | -                                      | -                                      | Toluene (0.2)      | 120 / 0.5                     | 89                     | 1<99                                     |
| 9     | Rh <sub>2</sub> (TMA) <sub>4</sub> (4)    | -                                      | -                                      | Toluene (0.2)      | 70 / 2.5                      | 72                     | 1<99                                     |
| 10    | Rh <sub>2</sub> (oct) <sub>4</sub> (4)    | -                                      | -                                      | Toluene (0.2)      | 70 / 21                       | 30                     | 1:2.3                                    |
| 11    | Rh <sub>2</sub> (OAc) <sub>4</sub> (4)    | -                                      | -                                      | Toluene (0.2)      | 70 / 21                       | 43 <sup>e</sup>        | 1.87:1                                   |
| 12    | Rh <sub>2</sub> (esp) <sub>2</sub> (4)    | -                                      | -                                      | Toluene (0.2)      | 70 / 4                        | 68                     | 1<99                                     |
| 13    | Rh <sub>2</sub> (S-DOSP) <sub>4</sub> (4) | -                                      | -                                      | Toluene (0.2)      | 70 / 5                        | 80                     | 1:9                                      |
| 14    | Rh <sub>2</sub> (TMA) <sub>4</sub> (4)    | -                                      | -                                      | Toluene (0.2)      | 80 / 1                        | 76                     | 1<99                                     |
| 15    | Rh <sub>2</sub> (TMA) <sub>4</sub> (4)    | -                                      | -                                      | Toluene (0.2)      | 90 / 1                        | 80                     | 1<99                                     |
| 16    | Rh <sub>2</sub> (TMA) <sub>4</sub> (4)    | -                                      | -                                      | Toluene (0.2)      | 100 / 1                       | 83                     | 1:32                                     |
| 17    | -                                         | Pd(PPh <sub>3</sub> ) <sub>4</sub> (4) | -                                      | 1,2-DCE (0.13)     | 80 / 6                        | 61                     | 99>1                                     |
| 18    | -                                         | Pd <sub>2</sub> (dba) <sub>3</sub> (2) | P(4-MeOPh) <sub>3</sub> (8)            | 1,2-DCE (0.13)     | 80 / 5                        | 76                     | 99>1                                     |
| 19    | -                                         | Pd <sub>2</sub> (dba) <sub>3</sub> (2) | P(4-MeOPh) <sub>3</sub> (8)            | MeCN (0.13)        | 80 / 3                        | 70                     | 99>1                                     |
| 20    | -                                         | Pd <sub>2</sub> (dba) <sub>3</sub> (2) | P(4-MeOPh) <sub>3</sub> (8)            | Toluene (0.13)     | 80 / 7                        | 35                     | 99>1                                     |
| 21    | -                                         | Pd <sub>2</sub> (dba) <sub>3</sub> (2) | P(4-MeOPh) <sub>3</sub> (8)            | 1,4-dioxane (0.13) | 80 / 7                        | 31                     | 99>1                                     |
| 22    | -                                         | Pd <sub>2</sub> (dba) <sub>3</sub> (2) | Dppf (4)                               | 1,2-DCE (0.13)     | 80 / 6                        | 30                     | 99>1                                     |
| 23    | -                                         | Pd <sub>2</sub> (dba) <sub>3</sub> (2) | PPh <sub>3</sub> (8)                   | 1,2-DCE (0.13)     | 80 / 6                        | 41                     | 99>1                                     |
| 24    | -                                         | Pd <sub>2</sub> (dba) <sub>3</sub> (2) | Xantphos (4)                           | 1,2-DCE (0.13)     | 80 / 5                        | 15                     | 99>1                                     |
| 25    | -                                         | Pd <sub>2</sub> (dba) <sub>3</sub> (2) | <i>rac</i> -BINAP (4)                  | 1,2-DCE (0.13)     | 80 / 5                        | N.D <sup>f</sup>       | 99>1                                     |
| 26    | -                                         | Pd <sub>2</sub> (dba) <sub>3</sub> (2) | Segphos (4)                            | 1,2-DCE (0.13)     | 80 / 5                        | N.D <sup>f</sup>       | 99>1                                     |
| 27    | -                                         | Pd <sub>2</sub> (dba) <sub>3</sub> (2) | P( <i>o</i> -tolylPh) <sub>3</sub> (8) | 1,2-DCE (0.13)     | 80 / 5                        | 72                     | 99>1                                     |
| 28    | -                                         | Pd <sub>2</sub> (dba) <sub>3</sub> (2) | P(4-MeOPh) <sub>3</sub> (8)            | 1,2-DCE (0.13)     | 90 / 3                        | 80                     | 99>1                                     |

<sup>a</sup>Reaction conditions: **1a** (0.2 mmol), catalyst, and MS 4 Å in solvent at designated temperature. <sup>b</sup>Time for complete conversion of **1a** determined by TLC. <sup>c</sup>Isolated yield. N.R.: No reaction occurred at all. <sup>d</sup>**2a:5a** ratio were determined by <sup>1</sup>H NMR analysis. <sup>e</sup>Starting material was recovered in 46% yield. <sup>f</sup>Only cyclic imidate intermediate **4a** was detected.

#### 4. Table S2. Optimization for the Synthesis of **2a** Using Lewis Acid Catalyst.<sup>a</sup>

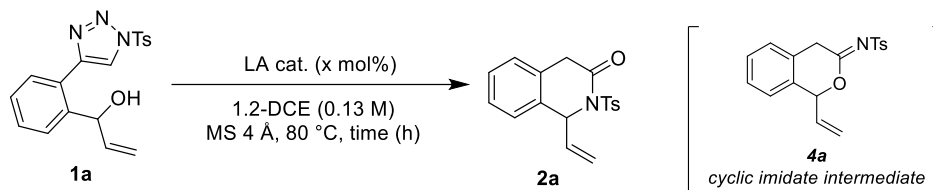

In a glovebox, a flame-dried vial equipped with a stirrer bar was charged with triazole **1a** (0.2 mmol), catalyst, 4 Å molecular sieves and sealed under an argon atmosphere. A solvent was added to the mixture and the solution was heated until all triazole was consumed (determined by TLC analysis). After being cooled to room temperature, the solvent was evaporated, dried under vacuum, and determined the product from crude <sup>1</sup>H NMR spectrum.

| Entry | Lewis acid Catalyst (mol%)                | time (h) <sup>b</sup> | Yield (%)        |
|-------|-------------------------------------------|-----------------------|------------------|
| 1     | PdCl <sub>2</sub> (PhCN) <sub>2</sub> (4) | 12                    | N.D <sup>c</sup> |
| 2     | PdCl <sub>2</sub> (MeCN) <sub>2</sub> (4) | 12                    | N.D <sup>c</sup> |
| 3     | PPh <sub>3</sub> (2)                      | 12                    | No reaction      |
| 4     | Sc(OTf) <sub>3</sub> (2)                  | 12                    | Decomposed       |
| 5     | Cu(OTf) <sub>2</sub> (2)                  | 12                    | Decomposed       |
| 6     | Zn(OTf) <sub>2</sub> (2)                  | 6                     | N.D <sup>c</sup> |

<sup>a</sup>Reaction conditions: **1a** (0.2 mmol) Lewis acid cat. and MS 4 Å in 1,2-DCE (1.5 ml) at 80 °C. <sup>b</sup>Time for complete conversion of **1a** determined by TLC. <sup>c</sup>Only cyclic imidate intermediate was detected.

## 5. Table S3. Optimization for the Synthesis of **3a** via Tandem One-Pot Rh(II)/Pd(0) Catalysis.<sup>a</sup>

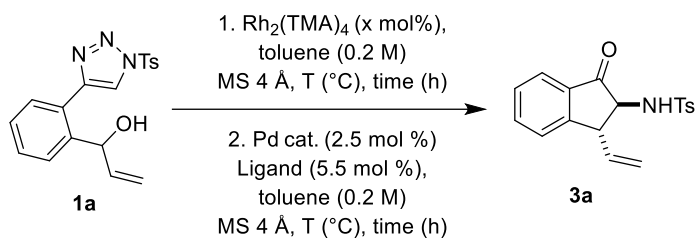

To a flame-dried vial equipped with a stirrer bar was added  $\text{Rh}_2(\text{TMA})_4$ , MS 4 Å, triazole **1a** (0.2 mmol), and toluene (1 mL, 0.2 M) then the vial was sealed by the cap in a glove box. The solution was stirred and heated for 0.5 h to 1 h. After completion of the reaction, the mixture was cooled to room temperature, and charged with Pd cat. and ligand in a glovebox. The solution was stirred and heated until the reaction was completed (determined by TLC). The crude mixture was purified by column chromatography to afford the corresponding 2-aminoindanone **3a**.

**Note.** Initial configuration of the product **3a** was exclusively *trans* which was determined by  $^1\text{H}$  NMR analysis of the crude reaction mixture. However, the configuration of **3a** was changed to *trans/cis* mixture after column chromatography due to highly enolizable  $\alpha$ -proton to the carbonyl.

| Entry           | Rh catalyst (mol%)              | T (°C)<br>/time (h) <sup>b</sup> | Pd Catalyst                                     | Ligand               | T (°C)<br>/time (h) | Yield (%) <sup>b</sup> |
|-----------------|---------------------------------|----------------------------------|-------------------------------------------------|----------------------|---------------------|------------------------|
| 1               | $\text{Rh}_2(\text{TMA})_4$ (2) | 120 / 0.5                        | $\text{Pd}(\text{PPh}_3)_4$                     | -                    | 60 / 12             | trace                  |
| 2               | $\text{Rh}_2(\text{TMA})_4$ (2) | 120 / 0.5                        | $\text{Pd}(\text{PPh}_3)_4$                     | -                    | 120 / 1             | decomposed             |
| 3               | $\text{Rh}_2(\text{TMA})_4$ (2) | 120 / 0.5                        | $\text{Pd}_2(\text{dba})_3 \cdot \text{CHCl}_3$ | <i>rac</i> -BINAP    | 60 / 2              | 50                     |
| 4               | $\text{Rh}_2(\text{TMA})_4$ (2) | 120 / 0.5                        | $\text{Pd}_2(\text{dba})_3 \cdot \text{CHCl}_3$ | ( <i>R</i> )-Segphos | 60 / 12             | 12                     |
| 5               | $\text{Rh}_2(\text{TMA})_4$ (2) | 120 / 0.5                        | $\text{Pd}_2(\text{dba})_3 \cdot \text{CHCl}_3$ | dppp                 | 60 / 12             | 12                     |
| 6               | $\text{Rh}_2(\text{TMA})_4$ (2) | 120 / 0.5                        | $\text{Pd}_2(\text{dba})_3 \cdot \text{CHCl}_3$ | dppb                 | 60 / 12             | 30                     |
| 7               | $\text{Rh}_2(\text{TMA})_4$ (2) | 120 / 0.5                        | $\text{Pd}_2(\text{dba})_3 \cdot \text{CHCl}_3$ | dppf                 | 60 / 12             | 20                     |
| 8               | $\text{Rh}_2(\text{TMA})_4$ (2) | 120 / 0.5                        | $\text{Pd}_2(\text{dba})_3 \cdot \text{CHCl}_3$ | xantphos             | 60 / 2              | 72                     |
| 9               | $\text{Rh}_2(\text{TMA})_4$ (2) | 120 / 0.5                        | $\text{Pd}_2(\text{dba})_3$                     | xantphos             | 60 / 2.5            | 15                     |
| 10              | $\text{Rh}_2(\text{TMA})_4$ (2) | 120 / 0.5                        | $\text{Pd}(\text{OAc})_2$                       | xantphos             | 60 / 1              | 74                     |
| 11              | $\text{Rh}_2(\text{TMA})_4$ (2) | 120 / 0.5                        | $\text{Pd}_2(\text{dba})_3 \cdot \text{CHCl}_3$ | xantphos             | 80 / 1              | 61                     |
| 12 <sup>c</sup> | $\text{Rh}_2(\text{TMA})_4$ (4) | 90 / 1                           | $\text{Pd}_2(\text{dba})_3 \cdot \text{CHCl}_3$ | xantphos             | 60 / 2              | 72                     |

<sup>a</sup>Reaction conditions: **1a** (0.2 mmol)  $\text{Rh}_2(\text{TMA})_4$  ( $4.0 \times 10^{-3}$  mmol) and MS 4 Å in toluene (1.0 ml) at designated temperature. <sup>b</sup>Isolated yield of the *cis* and *trans* mixture. <sup>c</sup>The reaction conditions with 4 mol%  $\text{Rh}_2(\text{TMA})_4$  at 90 °C were more suitable for other substrates than with 2 mol%  $\text{Rh}_2(\text{TMA})_4$  at 120 °C.

## 6. All in One-Pot Rh(II)/Pd(0) Catalysis of **1a** for the Synthesis of **3a**.

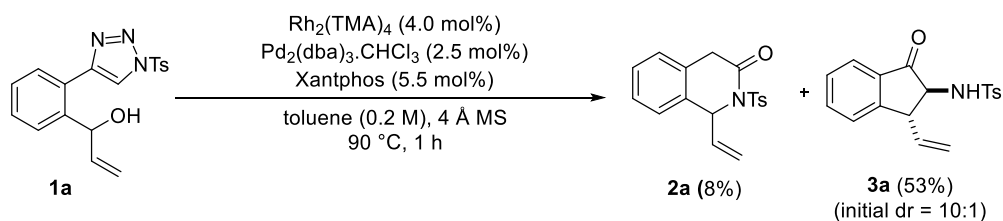

To a flame-dried vial equipped with a stirrer bar was added  $\text{Rh}_2(\text{TMA})_4$  (4.9 mg,  $8.0 \times 10^{-3}$  mmol),  $\text{Pd}_2(\text{dba})_3 \cdot \text{CHCl}_3$  (5.5 mg,  $5.0 \times 10^{-3}$  mmol), Xantphos (6.4 mg,  $1.1 \times 10^{-2}$  mmol), MS 4 Å, triazole **1a** (0.2 mmol), and toluene (1 mL, 0.2 M) then the vial was sealed by the cap in a glove box. The solution was stirred and heated to 120 °C for 1 h. The diastereomeric ratio of **3a** was determined by  $^1\text{H}$  NMR of crude mixture (*trans*:*cis*=10:1). The reaction mixture was purified by column chromatography to afford the products **2a** (8%) and **3a** (53%).

## 7. General Procedure for the Synthesis of **2**.

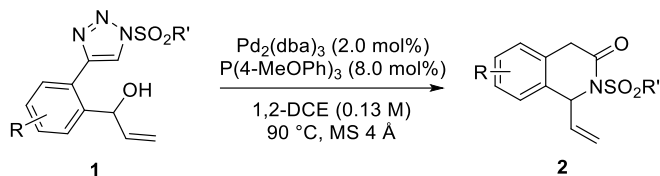

In a glovebox, a flame-dried vial equipped with a stir bar was charged with  $\text{Pd}_2(\text{dba})_3$  (3.7 mg,  $4.0 \times 10^{-3}$  mmol),  $\text{P}(4\text{-MeOPh})_3$  (5.6 mg,  $1.6 \times 10^{-2}$  mmol), MS 4 Å and triazole **1** (0.2 mmol), then sealed by the pressure tube cap. To that mixture, 1,2-DCE (1.5 ml, 0.13 M) was added. The solution was heated at 90 °C until all triazole **1** was consumed (determined by TLC analysis). After being cooled to room temperature, the crude mixture was concentrated under reduced pressure. The residue was purified by column chromatography to afford the corresponding 1,4-dihydro-isoquinolin-3(2H)-one **2**.

## 8. General Procedure for Synthesis of **3**.

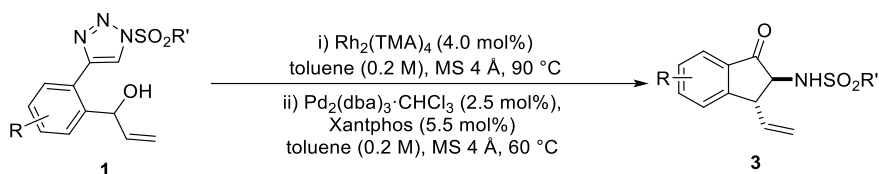

In a glovebox, a flame-dried vial equipped with a stirrer bar was charged with  $\text{Rh}_2(\text{TMA})_4$  (4.9 mg,  $8.0 \times 10^{-3}$  mmol), MS 4 Å, triazole (**1**) (0.2 mmol) and toluene (1.0 mL, 0.2 M), then the vial was sealed by the cap. The solution was stirred and heated until all triazole **1** was consumed (determined by TLC). After cooled to room temperature, the reaction mixture was moved to a glovebox and charged with  $\text{Pd}_2(\text{dba})_3 \cdot \text{CHCl}_3$  (5.5 mg,  $5.0 \times 10^{-3}$  mmol), and Xantphos (6.4 mg,  $1.1 \times 10^{-2}$  mmol). The solution was stirred at 60 °C until the reaction was completed. The crude mixture was purified by column chromatography to afford the corresponding 2-aminoindanone **3**.

## 9. General Procedure for Tandem Synthesis of **3a**.

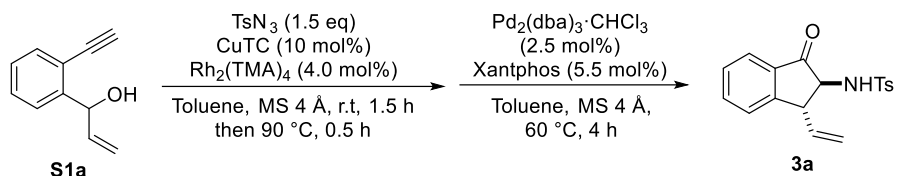

A solution of **S1a** (47 mg, 0.3 mmol, 1.0 equiv), tosyl azide (71 mg, 0.36 mmol, 1.2 equiv),  $\text{CuTC}$  (2.9 mg, TC= thiophene-2-carboxylate),  $\text{Rh}_2(\text{TMA})_4$  (7.3 mg,  $1.2 \times 10^{-2}$  mmol), and MS 4 Å in toluene (1.5 mL, 0.2 M) was stirred for 1.5 h at room temperature. Then, the mixture was heated to 90 °C for 0.5 h. After cooled to room temperature, the reaction mixture was moved to a glovebox and charged with  $\text{Pd}_2(\text{dba})_3 \cdot \text{CHCl}_3$  (7.8 mg,  $7.5 \times 10^{-3}$  mmol), and Xantphos (9.5 mg,  $1.65 \times 10^{-2}$  mmol). The solution was stirred at 60 °C for 4 h, then the crude mixture was purified by column chromatography to afford the corresponding **3a** in 45 % overall yield.

## 10. Deuterium Labeling Experiment.

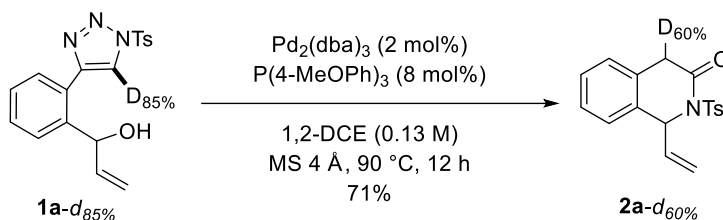

Deuterium labelled **2a-d<sub>60%</sub>** was produced from **1a-d<sub>85%</sub>** according to the general procedure.

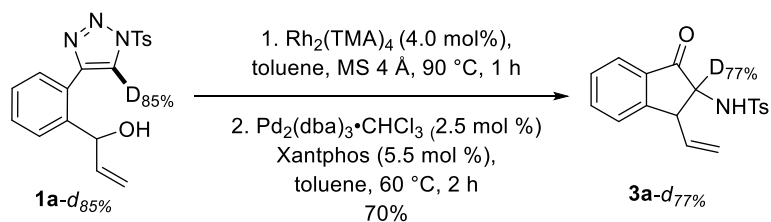

Deuterium labelled **3a-d<sub>77%</sub>** was produced from **1a-d<sub>85%</sub>** according to the general procedure. The deuterium incorporation was observed by only in  $^1\text{H}$  NMR of the crude mixture since proton exchange occurred while conducting column chromatography.

Copies of  $^1\text{H}$  spectra of compound **1a-d<sub>85%</sub>**

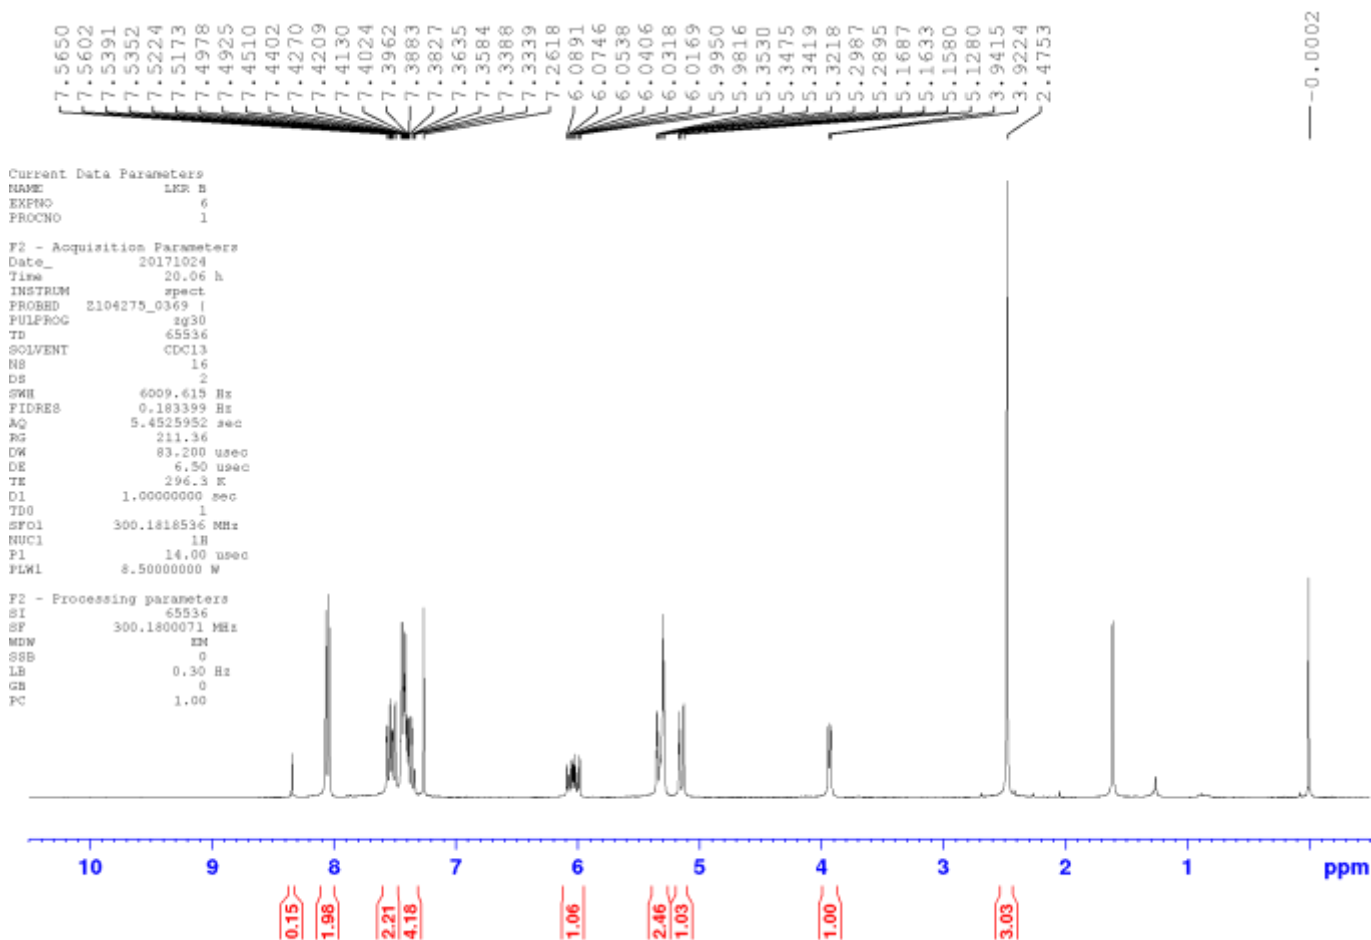

Copies of  $^1\text{H}$  spectra of compound **2a-d**<sub>60%</sub>

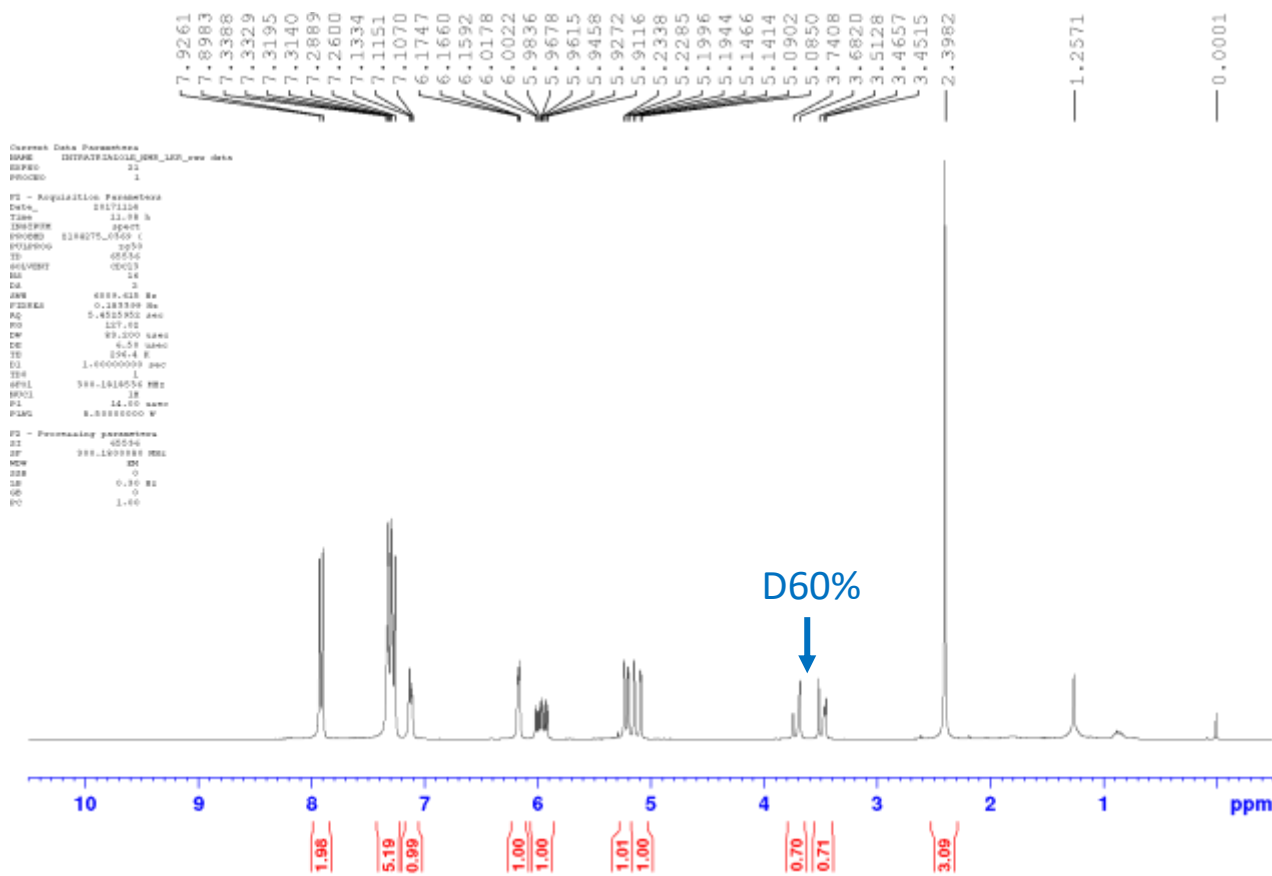

Copies of  $^1\text{H}$  spectra of crude mixture of compound **3a-d**<sub>77%</sub>

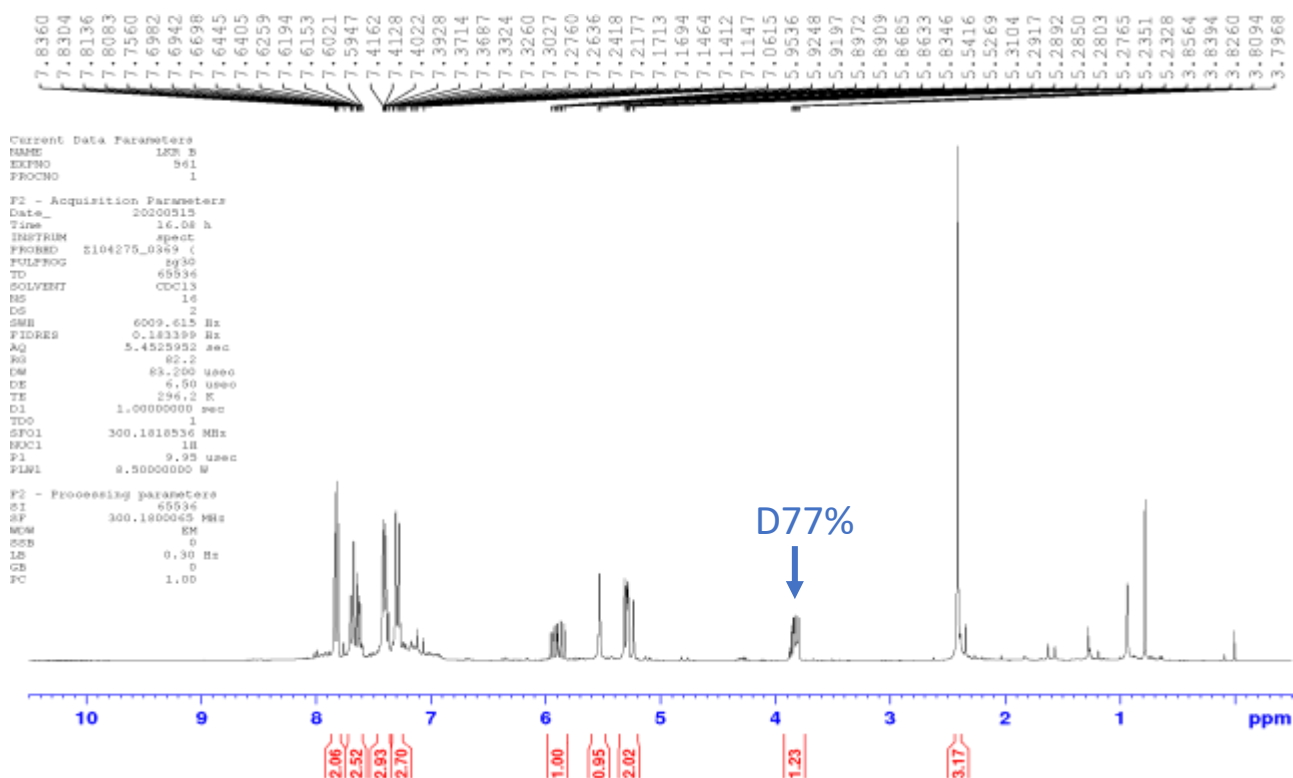



## 11. Characterization Data

### 1-{2-[1-(4-Methylbenzene-1-sulfonyl)-1H-1,2,3-triazol-4-yl]phenyl}prop-2-en-1-ol (1a).

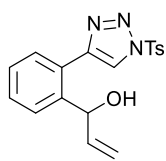

Yield: 75%; Eluent: *n*-hexane/ethyl acetate = 4/1; White solid; mp: 100–102 °C. <sup>1</sup>H NMR (300 MHz, CDCl<sub>3</sub>) δ 2.47 (s, 1H), 3.94 (brs, O–H), 5.09–5.20 (m, 1H), 5.26–5.39 (m, 2H), 5.96–6.12 (m, 1H), 7.32–7.47 (m, 4H), 7.47–7.60 (m, 2H), 8.00–8.09 (m, 2H), 8.34 (s, 1H) ppm; <sup>13</sup>C NMR (75.5 MHz, CDCl<sub>3</sub>) δ 22.0, 71.8, 115.2, 121.6, 127.9, 128.3, 128.7, 129.0, 129.8, 130.0, 130.7, 132.9, 138.7, 141.1, 147.0, 147.8 ppm; HRMS (EI) Calcd *m/z* for C<sub>18</sub>H<sub>17</sub>N<sub>3</sub>O<sub>3</sub>S [M]<sup>+</sup>: 355.0991. Found: 355.0989.

### 1-{4-Methyl-2-[1-(4-methylbenzene-1-sulfonyl)-1H-1,2,3-triazol-4-yl]phenyl}prop-2-en-1-ol (1b).

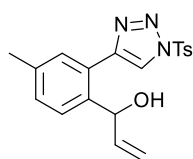

Yield: 70%; Eluent: *n*-hexane/ethyl acetate = 4/1; Yellow solid; mp: 98–100 °C. <sup>1</sup>H NMR (300 MHz, CDCl<sub>3</sub>) δ 2.36 (s, 3H), 2.47 (s, 3H), 3.89 (brs, O–H), 5.08–5.16 (m, 1H), 5.22–5.35 (m, 2H), 5.94–6.10 (m, 1H), 7.21 (dd, *J* = 7.9 Hz, *J* = 1.2 Hz, 1H), 7.30–7.37 (m, 1H), 7.38–7.46 (m, 3H), 8.00–8.10 (m, 2H), 8.35 (s, 1H) ppm; <sup>13</sup>C NMR (75.5 MHz, CDCl<sub>3</sub>) δ 21.1, 22.0, 71.6, 115.0, 121.5, 127.7, 128.7, 128.9, 130.4, 130.6, 130.7, 133.0, 138.1, 138.2, 138.9, 147.0, 147.7 ppm; HRMS (EI) Calcd *m/z* for C<sub>19</sub>H<sub>19</sub>N<sub>3</sub>O<sub>3</sub>S [M]<sup>+</sup>: 369.1147. Found: 369.1144.

### 1-{5-Methoxy-2-[1-(4-methylbenzene-1-sulfonyl)-1H-1,2,3-triazol-4-yl]phenyl}prop-2-en-1-ol (1c).

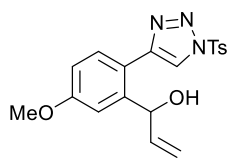

Yield: 50%; Eluent: *n*-hexane/ethyl acetate = 2/1; Yellow sticky solid; <sup>1</sup>H NMR (300 MHz, CDCl<sub>3</sub>) δ 2.46 (s, 3H), 3.83 (s, 3H), 4.00–4.13 (m, 1H), 5.07–5.21 (m, 1H), 5.21–5.39 (m, 2H), 5.91–6.11 (m, 1H), 6.89 (dd, *J* = 8.6 Hz, *J* = 2.7 Hz, 1H), 7.07 (d, *J* = 2.7 Hz, 1H), 7.38–7.47 (m, 3H), 8.00–8.09 (m, 2H), 8.26 (s, 1H) ppm; <sup>13</sup>C NMR (75.5 MHz, CDCl<sub>3</sub>) δ 22.0, 55.5, 71.8, 113.7, 114.0, 115.3, 120.2, 120.9, 128.9, 130.7, 131.3, 133.0, 138.5, 142.8, 146.9, 147.7, 160.6 ppm; HRMS (EI) Calcd *m/z* for C<sub>19</sub>H<sub>19</sub>N<sub>3</sub>O<sub>4</sub>S [M]<sup>+</sup>: 385.1096. Found: 385.1093.

### 1-{6-[1-(4-Methylbenzene-1-sulfonyl)-1H-1,2,3-triazol-4-yl]-2H-1,3-benzodioxol-5-yl}prop-2-en-1-ol (1d).

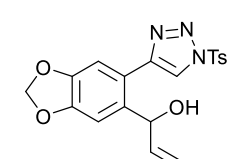

Yield: 35%; Eluent: *n*-hexane/ethyl acetate = 2/1; Yellow solid; mp: 101–103 °C. <sup>1</sup>H NMR (300 MHz, CDCl<sub>3</sub>) δ 2.47 (s, 3H), 3.53–3.70 (m, O–H), 5.09–5.26 (m, 2H), 5.26–5.45 (m, 1H), 5.92–6.07 (m, 3H), 6.98 (d, *J* = 19.7, 2H), 7.42 (d, *J* = 8.5 Hz, 2H), 7.96–8.15 (m, 2H), 8.27 (s, 1H) ppm; <sup>13</sup>C NMR (75.5 MHz, CDCl<sub>3</sub>) δ 22.0, 71.0, 101.8, 108.7, 109.6, 115.2, 121.2, 129.0, 130.7, 133.0, 135.8, 138.7, 146.6, 147.5, 147.8, 148.8 ppm; HRMS (FAB) Calcd *m/z* for C<sub>19</sub>H<sub>18</sub>N<sub>3</sub>O<sub>5</sub>S [M+H]<sup>+</sup>: 400.0967. Found: 400.0965.

### 1-{5-Fluoro-2-[1-(4-methylbenzene-1-sulfonyl)-1H-1,2,3-triazol-4-yl]phenyl}prop-2-en-1-ol (1e).

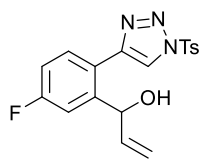

Yield: 69%; Eluent: *n*-hexane/ethyl acetate = 4/1; Colorless oil; <sup>1</sup>H NMR (300 MHz, CDCl<sub>3</sub>) δ 2.47 (s, 3H), 3.98 (brs, O–H), 5.12–5.22 (m, 1H), 5.25–5.35 (m, 2H), 5.88–6.09 (m, 1H), 6.98–7.07 (m, 1H), 7.22–7.29 (m, 1H), 7.41–7.45 (d, *J* = 8.1 Hz, 2H), 7.48 (dd, *J* = 8.5 Hz, *J* = 5.6 Hz, 1H), 7.99–8.08 (m, 2H), 8.33 (s, 1H) ppm; <sup>13</sup>C NMR (75.5 MHz, CDCl<sub>3</sub>) δ 22.0, 71.1 (d, *J* = 1.0 Hz), 115.2 (d, *J* = 22.0 Hz), 115.5 (d, *J* = 22.6 Hz), 115.8, 121.5, 123.8 (d, *J* = 3.3 Hz), 128.9, 130.7, 131.8 (d, *J* =

8.4 Hz), 132.8, 138.0, 143.8 (d,  $J = 6.9$  Hz), 146.0, 147.9, 163.3 (d,  $J = 249.8$  Hz) ppm;  $^{19}\text{F}$  NMR (282 MHz,  $\text{CDCl}_3$ )  $\delta$  -111.10 – -111.02 (m) ppm; HRMS (EI) Calcd  $m/z$  for  $\text{C}_{18}\text{H}_{16}\text{FN}_3\text{O}_3\text{S}$   $[\text{M}]^+$ : 373.0896. Found: 373.0894.

#### 1-(2-Fluoro-6-(1-tosyl-1H-1,2,3-triazol-4-yl)phenyl)prop-2-en-1-ol (1f).

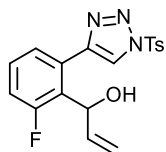

Yield: 50%; Eluent: *n*-hexane/ethyl acetate = 4/1; Yellow oil.  $^1\text{H}$  NMR (300 MHz,  $\text{CDCl}_3$ )  $\delta$  2.48 (s, 3H), 4.76–4.89 (m, 1H), 4.96–5.11 (m, 1H), 5.59–5.72 (m, 1H), 5.81–5.99 (m, 1H), 7.09–7.21 (m, 1H), 7.22–7.28 (m, 1H), 7.29–7.38 (m, 1H), 7.43 (d,  $J = 8.2$  Hz, 2H), 8.00–8.10 (m, 2H), 8.28 (s, 1H) ppm;  $^{13}\text{C}$  NMR (75.5 MHz,  $\text{CDCl}_3$ )  $\delta$  22.0, 67.7 (d,  $J = 6.4$  Hz), 114.8, 117.1 (d,  $J = 24.3$  Hz), 122.1, 126.3 (d,  $J = 3.3$  Hz), 128.9(6) (d,  $J = 13.8$  Hz), 128.9(7), 129.5 (d,  $J = 9.8$  Hz), 129.8 (d,  $J = 4.2$  Hz), 130.7, 132.8, 138.6 (d,  $J = 1.7$  Hz), 146.4 (d,  $J = 3.3$  Hz), 147.9, 161.4 (d,  $J = 247.0$  Hz) ppm;  $^{19}\text{F}$  NMR (282 MHz,  $\text{CDCl}_3$ )  $\delta$  -114.60 – -114.54 (m) ppm; HRMS (FAB) Calcd  $m/z$  for  $\text{C}_{18}\text{H}_{17}\text{FN}_3\text{O}_3\text{S}$   $[\text{M}+\text{H}]^+$ : 374.0975. Found: 374.0978.

#### 1-{4-Chloro-2-[1-(4-methylbenzene-1-sulfonyl)-1H-1,2,3-triazol-4-yl]phenyl}prop-2-en-1-ol (1g).

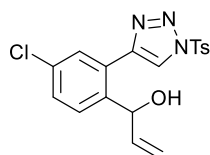

Yield: 72%; Eluent: *n*-hexane/ethyl acetate = 4/1; Yellow solid; mp: 110–115 °C.  $^1\text{H}$  NMR (300 MHz,  $\text{CDCl}_3$ )  $\delta$  2.48 (s, 3H), 3.78 (brs, O–H), 5.12–5.22 (m, 1H), 5.24–5.39 (m, 2H), 5.93–6.08 (m, 1H), 7.34–7.40 (m, 1H), 7.42 (s, 1H), 7.45 (s, 1H), 7.47–7.54 (m, 2H), 8.00–8.11 (m, 2H), 8.37 (s, 1H) ppm;  $^{13}\text{C}$  NMR (75.5 MHz,  $\text{CDCl}_3$ )  $\delta$  22.0, 71.1, 115.6, 122.0, 129.0, 129.5, 129.6, 130.2, 130.8, 132.8, 133.9, 138.3, 139.5, 145.6, 148.0 ppm; HRMS (EI) Calcd  $m/z$  for  $\text{C}_{18}\text{H}_{16}^{35}\text{ClN}_3\text{O}_3\text{S}$   $[\text{M}]^+$ : 389.0601. Found: 389.0604.

#### 1-{5-Bromo-2-[1-(4-methylbenzene-1-sulfonyl)-1H-1,2,3-triazol-4-yl]phenyl}prop-2-en-1-ol (1h).

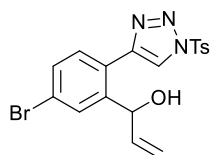

Yield: 76%; Eluent: *n*-hexane/ethyl acetate = 4/1; Yellow solid; mp: 108–112 °C.  $^1\text{H}$  NMR (300 MHz,  $\text{CDCl}_3$ )  $\delta$  2.48 (s, 3H), 3.83 (d,  $J = 5.4$  Hz, O–H), 5.15–5.26 (m, 1H), 5.25–5.31 (m, 1H), 5.31–5.41 (m, 1H), 5.91–6.11 (m, 1H), 7.36–7.40 (m, 1H), 7.42 (s, 1H), 7.44 (s, 1H), 7.50 (dd,  $J = 8.3$  Hz,  $J = 2.1$  Hz, 1H), 7.69 (d,  $J = 2.0$  Hz, 1H), 8.00–8.11 (m, 2H) 8.35 (s, 1H) ppm;  $^{13}\text{C}$  NMR (75.5 MHz,  $\text{CDCl}_3$ )  $\delta$  22.1, 71.2, 116.0, 121.6, 124.1, 126.8, 129.0, 130.8, 131.3, 131.4, 131.8, 132.8, 137.9, 143.1, 146.0, 148.0 ppm; HRMS (EI) Calcd  $m/z$  for  $\text{C}_{18}\text{H}_{16}^{79}\text{BrN}_3\text{O}_3\text{S}$   $[\text{M}]^+$ : 433.0096. Found: 433.0097.

#### 1-(2-(1-Tosyl-1H-1,2,3-triazol-4-yl)-5-(trifluoromethyl)phenyl)prop-2-en-1-ol (1i).

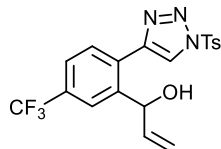

Yield: 72%; Eluent: *n*-hexane/ethyl acetate = 4/1; Yellow solid; mp: 119–121 °C.  $^1\text{H}$  NMR (300 MHz,  $\text{CDCl}_3$ )  $\delta$  2.48 (s, 3H), 3.77 (d,  $J = 5.3$  Hz, 1H), 5.18–5.30 (m, 1H), 5.32–5.46 (m, 2H), 5.92–6.14 (m, 1H), 7.44 (d,  $J = 9.0$  Hz, 2H), 7.51–7.69 (m, 2H), 7.83 (s, 1H), 8.00–8.18 (m, 2H), 8.42 (s, 1H) ppm;  $^{13}\text{C}$  NMR (75.5 MHz,  $\text{CDCl}_3$ ) 22.1, 71.2, 116.2, 122.1, 122.3, 125.0–125.1 (m), 125.6–125.7 (m), 129.1, 130.3, 130.8, 131.4, 130.3–131.8 (m), 132.7, 137.8, 141.9, 145.6, 148.1  $\delta$  ppm;  $^{19}\text{F}$  NMR (282 MHz,  $\text{CDCl}_3$ )  $\delta$  -62.77 ppm; HRMS (EI) Calcd  $m/z$  for  $\text{C}_{19}\text{H}_{16}\text{F}_3\text{N}_3\text{O}_3\text{S}$   $[\text{M}]^+$ : 424.0943. Found: 424.0946.

### 1-(3-(1-tosyl-1H-1,2,3-triazol-4-yl)benzo[b]thiophen-2-yl)prop-2-en-1-ol (1j).

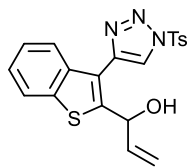

Yield: 70%; Eluent: *n*-hexane/ethyl acetate = 4/1; Brown solid; mp: 148–156 °C. <sup>1</sup>H NMR (300 MHz, CDCl<sub>3</sub>) δ 3.60 (s, 1H), 5.17–5.29 (m, 1H), 5.32–5.42 (m, 2H), 7.36–7.50 (m, 2H), 7.53–7.62 (m, 2H), 8.36 (s, 1H) ppm; <sup>13</sup>C NMR (75 MHz, CDCl<sub>3</sub>) δ 42.7, 71.6, 115.2, 121.5, 127.5, 128.3, 128.6, 129.8, 129.9, 138.6, 140.8, 146.8 ppm; HRMS (FAB) Calcd *m/z* for C<sub>20</sub>H<sub>18</sub>N<sub>3</sub>O<sub>3</sub>S<sub>2</sub> [M+H]<sup>+</sup>: 412.0790. Found: 412.0787.

### 1-{2-(1-(Methylsulfonyl)-1H-1,2,3-triazol-4-yl)phenyl}prop-2-en-1-ol (1k).

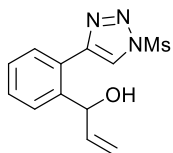

Yield: 45%; Eluent: *n*-hexane/ethyl acetate = 4/1; Colorless oil; <sup>1</sup>H NMR (300 MHz, CDCl<sub>3</sub>) δ 3.60 (s, 3H), 5.20–5.26 (m, 1H), 5.33–5.42 (m, 2H), 6.03–6.16 (m, 1H), 7.36–7.50 (m, 2H), 7.53–7.62 (m, 2H), 8.36 (s, 1H) ppm; <sup>13</sup>C NMR (75.5 MHz, CDCl<sub>3</sub>) δ 42.7, 71.6, 115.2, 121.5, 127.5, 128.3, 128.6, 129.8, 129.9, 138.6, 140.9, 146.8 ppm; HRMS (FAB) Calcd *m/z* for C<sub>12</sub>H<sub>14</sub>N<sub>3</sub>O<sub>3</sub>S [M+H]<sup>+</sup>: 280.0756. Found: 280.0758.

### 2-(Toluene-4-sulfonyl)-1-vinyl-1,4-dihydro-2H-isoquinolin-3-one (2a).

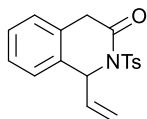

Yield: 80%; Eluent: *n*-hexane/ethyl acetate = 6/1; Light yellow solid; mp: 145–146 °C; <sup>1</sup>H NMR (300 MHz, CDCl<sub>3</sub>) δ 2.40 (s, 3H), 3.48 (d, *J* = 18.5 Hz, 1H), 3.71 (dd, *J* = 18.4 Hz, *J* = 1.1 Hz, 1H), 5.12 (dd, *J* = 17.0 Hz, *J* = 1.4 Hz, 1H), 5.17–5.28 (m, 1H), 5.97 (ddd, *J* = 16.9 Hz, *J* = 10.3 Hz, *J* = 4.7 Hz, 1H), 6.13–6.20 (m, 1H), 7.04–7.19 (m, 1H), 7.22–7.40 (m, 5H), 7.84–8.00 (m, 2H) ppm; <sup>13</sup>C NMR (75.5 MHz, CDCl<sub>3</sub>) δ 21.8, 39.5, 62.5, 116.7, 126.3, 127.6, 127.7, 128.6, 129.2, 129.4, 130.9, 133.6, 135.1, 136.0, 145.1, 169.0 ppm; HRMS (FAB) *m/z* Calcd for [M+H]<sup>+</sup>: C<sub>18</sub>H<sub>18</sub>NO<sub>3</sub>S: 328.1007. Found: 328.1009.

### 1-Ethenyl-2-[(4-methylphenyl)sulfonyl]-1,4-dihydroisoquinolin-3(2H)-one (2b).

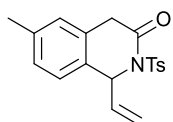

Yield: 88%; Eluent: *n*-hexane/ethyl acetate = 4/1 to 2/1; White solid; mp: 140–142 °C; <sup>1</sup>H NMR (300 MHz, CDCl<sub>3</sub>) δ 2.32 (s, 1H), 2.39 (s, 1H), 3.42 (d, *J* = 18.4 Hz, 1H), 3.68 (d, *J* = 18.4 Hz, 1H), 5.11 (dd, *J* = 16.9 Hz, *J* = 1.6 Hz, 1H), 5.19 (dd, *J* = 10.2 Hz, *J* = 1.6 Hz, 1H), 5.88–6.03 (m, 1H), 6.09–6.17 (m, 1H), 6.93 (s, 1H), 7.07–7.15 (m, 1H), 7.18–7.24 (m, 1H), 7.25 (m, 1H), 7.28 (m, 1H), 7.85–7.95 (m, 2H) ppm; <sup>13</sup>C NMR (75.5 MHz, CDCl<sub>3</sub>) δ 21.2, 21.7, 39.5, 62.4, 116.4, 126.2, 128.2(6), 128.2(9), 129.1, 129.3, 130.6, 130.8, 135.4, 136.0, 138.6, 145.0, 169.2 ppm; HRMS (EI) *m/z* Calcd for C<sub>19</sub>H<sub>19</sub>NO<sub>3</sub>S [M]<sup>+</sup>: 341.1086. Found: 341.1083.

### 1-Ethenyl-7-methoxy-2-[(4-methylphenyl)sulfonyl]-1,4-dihydroisoquinolin-3(2H)-one (2c).

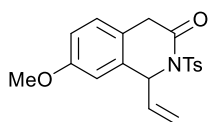

Reaction temperature: 100 °C; Yield: 50%; Eluent: *n*-hexane/ethyl acetate = 4/1; Light yellow solid; mp: 140–142 °C; <sup>1</sup>H NMR (300 MHz, CDCl<sub>3</sub>) δ 2.40 (s, 1H), 3.43 (d, *J* = 18.4 Hz, 1H), 3.63 (d, *J* = 18.4 Hz, 1H), 3.83 (s, 1H), 5.14 (dd, *J* = 16.9 Hz, *J* = 1.6 Hz, 1H), 5.22 (dd, *J* = 10.2 Hz, *J* = 1.6 Hz, 1H), 5.95 (ddd, *J* = 16.9 Hz, *J* = 10.3 Hz, *J* = 4.7 Hz, 1H), 6.06–6.15 (m, 1H), 6.78–6.90 (m, 2H), 6.99–7.07 (m, 1H), 7.23–7.33 (m, 2H), 7.85–7.95 (m, 2H) ppm; <sup>13</sup>C NMR (75.5 MHz, CDCl<sub>3</sub>) δ 21.8, 38.8, 55.6, 62.6, 111.9, 114.2, 116.8, 122.7, 128.8, 129.2, 129.4, 134.7, 135.0, 136.1, 145.1, 159.1, 169.3 ppm; HRMS (EI) *m/z* Calcd for C<sub>19</sub>H<sub>19</sub>NO<sub>4</sub>S [M]<sup>+</sup>: 357.1035. Found: 357.1032.

**5-Ethenyl-6-[(4-methylphenyl)sulfonyl]-5,8-dihydro[1,3]dioxolo[4,5-g]isoquinolin-7(6H)-one (2d).**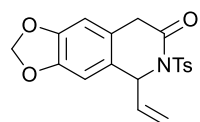

Yield: 50%; Eluent: *n*-hexane/ethyl acetate = 4/1; Yellow green solid; mp: 176–178 °C; <sup>1</sup>H NMR (300 MHz, CDCl<sub>3</sub>) δ 2.40 (s, 1H), 3.36 (d, *J* = 18.5 Hz, 1H), 3.61 (d, *J* = 18.4 Hz, 1H), 5.06–5.17 (m, 1H), 5.17–5.25 (m, 1H), 5.85–5.96 (m, 1H), 5.96–6.00 (m, 2H), 6.00–6.07 (m, 1H), 6.57 (s, 1H), 6.79 (s, 1H), 7.20–7.38 (m, 2H), 7.80–8.01 (m, 2H) ppm; <sup>13</sup>C NMR (75.5 MHz, CDCl<sub>3</sub>) δ 21.8, 39.4, 62.3, 101.6, 106.9, 108.0, 116.5, 124.3, 126.9, 129.1, 129.4, 135.0, 136.0, 145.1, 147.2, 148.0, 168.9 ppm; HRMS (EI) *m/z* Calcd for C<sub>19</sub>H<sub>17</sub>NO<sub>5</sub>S [M]<sup>+</sup>: 371.0827. Found: 371.0825.

**1-Ethenyl-7-fluoro-2-[(4-methylphenyl)sulfonyl]-1,4-dihydroisoquinolin-3(2H)-one (2e).**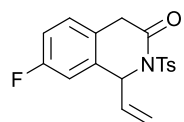

Yield: 64%; Eluent: *n*-hexane/ethyl acetate = 4/1; Yellow solid; mp: 138–140 °C; <sup>1</sup>H NMR (300 MHz, CDCl<sub>3</sub>) δ 2.41 (s, 1H), 3.47 (d, *J* = 18.4 Hz, 1H), 3.65 (d, *J* = 18.5 Hz, 1H), 5.13 (dd, *J* = 16.9 Hz, *J* = 1.7 Hz, 1H), 5.25 (dd, *J* = 10.3 Hz, *J* = 1.7 Hz, 1H), 5.87–6.01 (m, 1H), 6.06–6.20 (m, 1H), 6.91–7.13 (m, 3H), 7.25–7.33 (m, 2H), 7.83–8.01 (m, 1H) ppm; <sup>13</sup>C NMR (75.5 MHz, CDCl<sub>3</sub>) δ 21.8, 38.9, 62.1, 113.5 (d, *J* = 22.8 Hz), 115.7 (d, *J* = 21.6 Hz), 117.2, 126.7 (d, *J* = 3.2 Hz), 129.2, 129.3, 129.4, 134.5, 135.5 (d, *J* = 7.6 Hz), 135.8, 145.3, 162.0 (d, *J* = 247.4 Hz), 168.7 ppm; <sup>19</sup>F NMR (282 MHz, CDCl<sub>3</sub>) δ -114.21 – -114.13 (m) ppm; HRMS (EI) *m/z* Calcd for C<sub>18</sub>H<sub>16</sub>FNO<sub>3</sub>S [M]<sup>+</sup>: 345.0835. Found: 345.0837.

**1-Ethenyl-8-fluoro-2-[(4-methylphenyl)sulfonyl]-1,4-dihydroisoquinolin-3(2H)-one (2f).**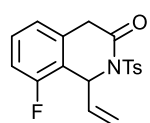

Yield: 30%; Eluent: *n*-hexane/ethyl acetate = 6/1; Orange solid; mp: 138–140 °C. <sup>1</sup>H NMR (300 MHz, CDCl<sub>3</sub>) δ 2.41 (s, 1H), 3.52 (d, *J* = 18.5 Hz, 1H), 3.70 (d, *J* = 18.5 Hz, 1H), 5.18 (dd, *J* = 17.0 Hz, *J* = 1.6 Hz, 1H), 5.26 (dd, *J* = 10.3 Hz, *J* = 1.7 Hz, 1H), 5.95 (ddd, *J* = 16.9 Hz, *J* = 10.3 Hz, *J* = 4.8 Hz, 1H), 6.46 – 6.59 (m, 1H), 6.87 – 6.97 (m, 1H), 6.99 – 7.11 (m, 1H), 7.23 – 7.33 (m, 3H), 7.89 – 7.99 (m, 1H) ppm; <sup>13</sup>C NMR (75.5 MHz, CDCl<sub>3</sub>) δ 21.8, 39.2, 56.0 (d, *J* = 3.3 Hz), 114.4 (d, *J* = 21.0 Hz), 117.0, 121.2 (d, *J* = 16.4 Hz), 123.2 (d, *J* = 3.5 Hz), 129.3 (d, *J* = 8.1 Hz), 130.2 (d, *J* = 8.3 Hz), 133.5(8), 133.6(1), 135.8, 145.3, 158.4 (d, *J* = 249.1 Hz), 168.5 ppm; <sup>19</sup>F NMR (282 MHz, CDCl<sub>3</sub>) δ -119.74 – -119.69 (m) ppm; HRMS (FAB) Calcd *m/z* for C<sub>18</sub>H<sub>17</sub>FN<sub>3</sub>O<sub>3</sub>S [M]<sup>+</sup>: 346.0913. Found: 346.0910.

**6-Chloro-1-ethenyl-2-[(4-methylphenyl)sulfonyl]-1,4-dihydroisoquinolin-3(2H)-one (2g).**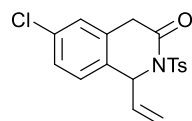

Reaction temperature: 100 °C; Yield: 41%; Eluent: *n*-hexane/ethyl acetate = 4/1; Yellow solid; mp: 132–134 °C; <sup>1</sup>H NMR (300 MHz, CDCl<sub>3</sub>) δ 2.41 (s, 1H), 3.45 (d, *J* = 18.5 Hz, 1H), 3.69 (d, *J* = 18.5 Hz, 1H), 5.11 (dd, *J* = 17.0 Hz, *J* = 1.7 Hz, 1H), 5.24 (dd, *J* = 10.3 Hz, *J* = 1.7 Hz, 1H), 5.87–6.02 (m, 1H), 6.08–6.20 (m, 1H), 7.13 (brs, 1H), 7.25–7.33 (m, 4H), 7.82–7.99 (m, 2H) ppm; <sup>13</sup>C NMR (75.5 MHz, CDCl<sub>3</sub>) δ 21.8, 39.2, 61.9, 117.0, 127.7, 127.7(8), 127.8(3), 129.2, 129.4, 132.1, 132.9, 134.5, 134.7, 135.8, 145.3, 168.2 ppm; HRMS (FAB) *m/z* Calcd for C<sub>18</sub>H<sub>17</sub><sup>35</sup>ClNO<sub>3</sub>S [M]<sup>+</sup>: 362.0618. Found: 362.0621; C<sub>18</sub>H<sub>17</sub><sup>37</sup>ClNO<sub>3</sub>S [M+2]<sup>+</sup>: 364.0593. Found: 364.0612.

### 7-bromo-1-ethenyl-2-[(4-methylphenyl)sulfonyl]-1,4-dihydroisoquinolin-3(2H)-one (2h).

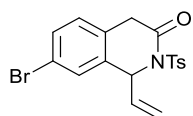

Reaction temperature: 100 °C; Yield: 76%; Eluent: *n*-hexane/ethyl acetate = 4/1; White solid; mp: 177–179 °C; <sup>1</sup>H NMR (300 MHz, CDCl<sub>3</sub>) δ 2.41 (s, 1H), 3.45 (d, *J* = 18.5 Hz, 1H), 3.63 (d, *J* = 18.3 Hz, 1H), 5.14 (dd, *J* = 16.9 Hz, *J* = 1.7 Hz, 1H), 5.25 (dd, *J* = 10.3 Hz, *J* = 1.7 Hz, 1H), 5.94 (ddd, *J* = 16.9 Hz, *J* = 10.3 Hz, *J* = 4.7 Hz, 1H), 6.07–6.16 (m, 1H), 6.97–7.04 (m, 1H), 7.26–7.34 (m, 2H), 7.40–7.46 (m, 1H), 7.46–7.53 (m, 1H), 7.84–7.99 (m, 2H) ppm; <sup>13</sup>C NMR (75.5 MHz, CDCl<sub>3</sub>) δ 21.8, 39.1, 61.9, 117.3, 121.3, 129.2, 129.3, 129.3(7), 129.4(4), 130.0, 131.7, 134.5, 135.6, 135.8, 145.3, 168.3 ppm; HRMS (FAB) *m/z* Calcd for C<sub>18</sub>H<sub>17</sub><sup>79</sup>BrNO<sub>3</sub>S [M]<sup>+</sup>: 406.0113. Found: 406.0114; C<sub>18</sub>H<sub>17</sub><sup>81</sup>BrNO<sub>3</sub>S [M]<sup>+</sup>: 408.0093. Found: 408.0134.

### 2-Tosyl-1-vinyl-1,4-dihydrobenzo[4,5]thieno[2,3-c]pyridin-3(2H)-one (2j).

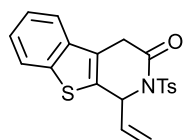

Yield: 24%; Eluent: *n*-hexane/ethyl acetate = 4/1; Yellow solid; mp: 198–200 °C. <sup>1</sup>H NMR (300 MHz, CDCl<sub>3</sub>) δ 2.42 (s, 1H), 3.63 (dd, *J* = 20.4 Hz, *J* = 1.4 Hz, 1H), 3.84 (d, *J* = 20.4 Hz, 1H), 5.28–5.36 (m, 1H), 5.36–5.48 (m, 1H), 5.91–6.11 (m, 1H), 6.23–6.37 (m, 1H), 7.29–7.34 (m, 2H), 7.34–7.43 (m, 2H), 7.50–7.59 (m, 1H), 7.79–7.90 (m, 1H), 7.91–8.01 (m, 2H) ppm; <sup>13</sup>C NMR (75.5 MHz, CDCl<sub>3</sub>) δ 21.8, 33.7, 59.4, 117.9, 121.1, 123.0, 124.9, 125.4, 125.7, 129.3, 129.4, 132.6, , 135.8, 135.9, 137.0, 140.2, 145.2, 167.8 ppm; HRMS (FAB) Calcd *m/z* for C<sub>20</sub>H<sub>18</sub>NO<sub>3</sub>S<sub>2</sub> [M+H]<sup>+</sup>: 384.0728. Found: 384.0729.

### 1-Ethenyl-2-(methylsulfonyl)-1,4-dihydroisoquinolin-3(2H)-one (2k).

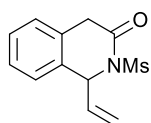

Yield: 64%; Eluent: *n*-hexane/ethyl acetate = 4/1 ; Light yellow liquid; <sup>1</sup>H NMR (300 MHz, CDCl<sub>3</sub>) δ 3.39 (s, 3H), 3.67 (d, *J* = 18.6 Hz, 1H), 3.83 (d, *J* = 18.6 Hz, 1H), 5.07–5.31 (m, 2H), 5.82–6.03 (m, 2H), 7.14–7.25 (m, 1H), 7.25–7.40 (m, 3H) ppm; <sup>13</sup>C NMR (75.5 MHz, CDCl<sub>3</sub>) δ 39.4, 42.6, 61.9, 116.8, 126.5, 127.7, 127.8, 128.8, 130.8, 133.2, 134.8, 170.5 ppm; HRMS (EI) *m/z* Calcd for C<sub>12</sub>H<sub>13</sub>NO<sub>3</sub>S [M]<sup>+</sup>: 251.0616. Found: 251.0614.

### *N*-[1-Ethenyl-3-oxo-2,3-dihydro-1H-inden-2-yl]-4-methylbenzene-1-sulfonamide (3a).

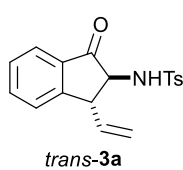

Yield: 72%; d.r > 99:1; Eluent: *n*-hexane/ethyl acetate = 4/1; White solid; mp: 135–138 °C. <sup>1</sup>H NMR (300 MHz, CDCl<sub>3</sub>) δ 2.43 (s, 3H), 3.78–3.90 (m, 2H), 5.22–5.39 (m, 3H), 5.84–6.01 (m, 1H), 7.31 (d, *J* = 8.1Hz, 2H), 7.38–7.48 (m, 2H), 7.62–7.76 (m, 2H), 7.83 (d, *J* = 8.3, 2H) ppm; <sup>13</sup>C NMR (75.5 MHz, CDCl<sub>3</sub>) δ 21.7, 51.4, 65.2, 119.2, 124.3, 126.6, 127.8, 128.7, 129.8, 133.2, 136.2(0), 136.2(4), 136.6, 144.0, 152.9, 200.5 ppm. HRMS (EI) Calcd *m/z* for C<sub>18</sub>H<sub>17</sub>NO<sub>3</sub>S [M]<sup>+</sup>: 327.0929. Found: 327.0930.

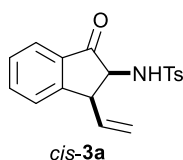

<sup>1</sup>H NMR (300 MHz, CDCl<sub>3</sub>) δ 2.42 (s, 3H), 4.22–4.26 (m, 1H), 4.32–4.37 (m, 1H), 4.80 (dt, *J* = 17.1 Hz, *J* = 1.2 Hz, 1H), 5.08–5.21 (m, 2H), 5.70–5.83 (m, 1H), 7.28–7.36 (m, 2H), 7.39–7.49 (m, 2H), 7.62–7.76 (m, 2H), 7.80–7.88 (m, 2H) ppm; <sup>13</sup>C NMR (75.5 MHz, CDCl<sub>3</sub>) δ 21.7, 48.0, 62.9, 118.6, 124.4, 127.5(5), 127.5(7), 128.8, 129.9, 133.2, 136.1, 136.5, 136.6, 144.0, 152.8, 200.4 ppm. HRMS (EI) Calcd *m/z* for C<sub>18</sub>H<sub>17</sub>NO<sub>3</sub>S [M]<sup>+</sup>: 327.0929. Found: 327.0930.

***N*-[1-Ethenyl-5-methyl-3-oxo-2,3-dihydro-1H-inden-2-yl]-4-methylbenzene-1-sulfonamide (3b).**

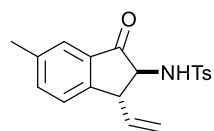

Yield: 71%; d.r > 99:1; Eluent: *n*-hexane/ethyl acetate = 4/1; Yellow solid; mp: 127–129 °C. <sup>1</sup>H NMR (300 MHz, CDCl<sub>3</sub>) δ 2.38 (s, 3H), 2.42 (s, 3H), 3.72–3.86 (m, 2H), 5.29–5.33 (m, 2H), 5.39 (d, *J* = 4.5 Hz, 1H), 5.80–5.97 (m, 1H), 7.25–7.36 (m, 3H), 7.43–7.53 (m, 2H), 7.77–7.88 (m, 2H) ppm; <sup>13</sup>C NMR (75.5 MHz, CDCl<sub>3</sub>) δ 21.2, 21.7, 51.0, 65.4, 118.8, 124.1, 126.2, 127.7, 129.7, 133.3, 136.4, 136.7, 137.4, 138.8, 143.8, 150.3, 200.5 ppm. HRMS (EI) Calcd *m/z* for C<sub>19</sub>H<sub>19</sub>NO<sub>3</sub>S [M]<sup>+</sup>: 341.1086. Found: 341.1083.

***N*-(3-Ethenyl-5-methoxy-1-oxo-2,3-dihydro-1H-inden-2-yl)-4-methylbenzene-1-sulfonamide (3c).**

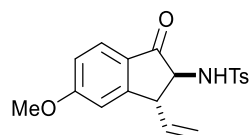

6.0 mol% of Rh<sub>2</sub>(TMA)<sub>4</sub> was used at 60 °C; Yield: 65%; d.r > 99:1; Eluent: *n*-hexane/ethyl acetate = 4/1; Yellow solid; mp: 90–92 °C. <sup>1</sup>H NMR (300 MHz, CDCl<sub>3</sub>) δ 2.42 (s, 3H), 3.71–3.84 (m, 2H), 3.88 (s, 3H), 5.24–5.39 (m, 2H), 5.81–5.99 (m, 1H), 6.77–6.87 (m, 1H), 6.89–6.97 (m, 1H), 7.31 (d, *J* = 8.0 Hz, 2H), 7.64 (d, *J* = 8.5 Hz, 1H), 7.78–7.87 (m, 2H) ppm; <sup>13</sup>C NMR (75.5 MHz, CDCl<sub>3</sub>) δ 21.6, 51.5, 55.8, 64.9, 109.6, 116.9, 119.2, 126.1(8), 126.1(9), 127.8, 129.8, 136.3, 136.4, 143.9, 156.4, 166.6, 198.3 ppm; HRMS (EI) Calcd *m/z* for C<sub>19</sub>H<sub>19</sub>NO<sub>4</sub>S [M]<sup>+</sup>: 357.1035. Found: 357.1033.

***N*-(5-Ethenyl-7-oxo-6,7-dihydro-2H,5H-indeno[5,6-d][1,3]dioxol-6-yl)-4-methylbenzene-1-sulfonamide (3d).**

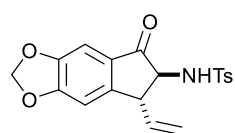

6.0 mol% of Rh<sub>2</sub>(TMA)<sub>4</sub> was used at 60 °C; Yield: 51%, d.r = 91:9; Eluent: *n*-hexane/ethyl acetate = 4/1; Yellow solid; mp: 170–172 °C. <sup>1</sup>H NMR (300 MHz, CDCl<sub>3</sub>) δ 2.43 (s, 3H), 3.65–3.82 (m, 2H), 5.18–5.40 (m, 3H), 5.79–5.94 (m, 1H), 6.08 (s, 2H), 6.77 (s, 1H), 7.03 (s, 1H), 7.28–7.36 (m, 2H), 7.78–7.86 (m, 2H) ppm; <sup>13</sup>C NMR (75.5 MHz, CDCl<sub>3</sub>) δ 21.7, 51.3, 65.1, 102.6, 102.7, 105.9, 119.1, 127.7, 127.8, 129.8, 136.3(6), 136.4(2), 144.0, 149.2, 151.3, 155.6, 198.1 ppm; HRMS (EI) Calcd *m/z* for C<sub>19</sub>H<sub>17</sub>NO<sub>5</sub>S [M]<sup>+</sup>: 371.0827. Found: 371.0827.

***N*-(3-Ethenyl-5-fluoro-1-oxo-2,3-dihydro-1H-inden-2-yl)-4-methylbenzene-1-sulfonamide (3e).**

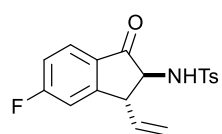

Yield: 78%; d.r > 99:1; Eluent: *n*-hexane/ethyl acetate = 4/1; colorless oil; <sup>1</sup>H NMR (300 MHz, CDCl<sub>3</sub>) δ 2.43 (s, 3H), 3.77–3.90 (m, 2H), 5.22–5.42 (m, 3H), 5.82–5.99 (m, 1H), 7.05–7.17 (m, 2H), 7.32(d, *J* = 8.0 Hz, 2H), 7.68–7.79 (m, 1H), 7.79–7.87 (m, 2H) ppm; <sup>13</sup>C NMR (75.5 MHz, CDCl<sub>3</sub>) δ 21.7, 51.3 (d, *J* = 7.5 Hz), 65.2, 113.5 (d, *J* = 22.6 Hz), 117.2 (d, *J* = 24.0 Hz), 119.8, 126.8, 126.9 (d, *J* = 10.4 Hz), 127.8, 129.6 (d, *J* = 2.0 Hz), 129.8, 135.6, 136.5, 144.1, 156.2 (d, *J* = 9.9 Hz), 168.1 (d, *J* = 259 Hz), 198.6 ppm; <sup>19</sup>F NMR (282 MHz, CDCl<sub>3</sub>) δ -99.19 – -99.11 (m) ppm; HRMS (EI) Calcd *m/z* for C<sub>18</sub>H<sub>16</sub>FNO<sub>3</sub>S [M]<sup>+</sup>: 345.0835. Found: 345.0833.

***N*-(5-Chloro-1-ethenyl-3-oxo-2,3-dihydro-1H-inden-2-yl)-4-methylbenzene-1-sulfonamide (3g).**

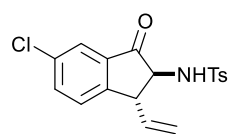

Yield: 61%; d.r = 91:9; Eluent: *n*-hexane/ethyl acetate = 4/1; Yellow solid; mp: 145–148 °C. <sup>1</sup>H NMR (300 MHz, CDCl<sub>3</sub>) δ 2.43 (s, 3H), 3.74–3.92 (m, 2H), 5.22–5.39 (m, 3H), 5.88 (ddd, *J* = 17.0 Hz, *J* = 8.4 Hz, *J* = 10.2 Hz, 1H), 7.28–7.41 (m, 3H), 7.56–7.69 (m, 2H), 7.78–7.86 (m, 2H) ppm; <sup>13</sup>C NMR (75.5 MHz, CDCl<sub>3</sub>) δ 21.7, 50.9, 65.5, 119.6, 123.9, 127.7, 127.9, 129.8, 134.6, 135.2, 135.7,

136.2, 136.6, 144.1, 150.9, 199.3 ppm; HRMS (EI) Calcd  $m/z$  for  $C_{18}H_{16}^{35}ClNO_3S [M]^+$ : 361.0539. Found: 361.0541;  $C_{18}H_{16}^{37}ClNO_3S [M+2]^+$ : 363.0515. Found: 363.0523.

***N*-(5-Bromo-1-oxo-3-vinyl-2,3-dihydro-1*H*-inden-2-yl)-4-methylbenzenesulfonamide (3h).**

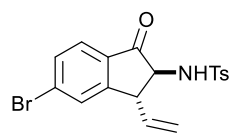

20 mol% of TFA was added in Pd catalysis step; Yield: 62%; d.r = 91:9; Eluent: *n*-hexane/ethyl acetate = 4/1; White solid; mp: 138–140 °C.  $^1H$  NMR (300 MHz,  $CDCl_3$ )  $\delta$  2.43 (s, 3H), 3.72–3.93 (m, 2H), 5.22–5.45 (m, 3H), 5.78–5.99 (m, 1H), 7.31 (d,  $J$  = 8.0 Hz, 1H), 7.53–7.63 (m, 3H), 7.77–7.87 (m, 2H) ppm;  $^{13}C$  NMR (75.5 MHz,  $CDCl_3$ )  $\delta$  21.7, 51.2, 65.2, 119.9, 125.5, 127.8, 129.9, 130.0, 131.9, 132.0, 132.5, 135.5, 136.5, 144.1, 154.5, 199.3 ppm; HRMS (EI) Calcd  $m/z$  for  $C_{18}H_{16}^{79}BrNO_3S [M]^+$ : 405.0034. Found: 405.0037;  $C_{18}H_{16}^{81}BrNO_3S [M]^+$ : 407.0015. Found: 407.0006.

**4-Methyl-*N*-(1-oxo-5-(trifluoromethyl)-3-vinyl-2,3-dihydro-1*H*-inden-2-yl)benzenesulfonamide (3i).**

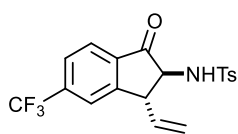

Yield: 68%; d.r = 95:5; Eluent: *n*-hexane/ethyl acetate = 4/1; White solid; mp: 150–152 °C.  $^1H$  NMR (300 MHz,  $CDCl_3$ )  $\delta$  2.45 (s, 3H), 3.83–4.02 (m, 2H), 5.27–5.49 (m, 3H), 5.81–6.01 (m, 1H), 7.34 (d,  $J$  = 8.1 Hz, 2H), 7.64–7.77 (m, 2H), 7.84 (d,  $J$  = 8.3 Hz, 3H) ppm;  $^{13}C$  NMR (75.5 MHz,  $CDCl_3$ )  $\delta$  21.7, 51.3, 65.6, 118.0–128.9 (m), 120.3, 123.7–123.8 (m), 124.9, 125.8–125.9 (m), 127.7, 129.8, 135.2, 135.8, 136.7, 136.7–138.1 (m), 144.1, 153.0, 199.7 ppm;  $^{19}F$  NMR (282 MHz,  $CDCl_3$ )  $\delta$  -63.04 ppm; HRMS (EI) Calcd  $m/z$  for  $C_{19}H_{16}F_3NO_3S [M]^+$ : 395.0803. Found: 395.0802.

***N*-(1-Ethenyl-3-oxo-2,3-dihydro-1*H*-inden-2-yl)methanesulfonamide (3h).**

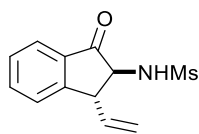

Yield: 50%; d.r = 91:9; Eluent: *n*-hexane/ethyl acetate = 4/1; Colorless oil; Major product  $^1H$  NMR (300 MHz,  $CDCl_3$ )  $\delta$  3.21 (s, 3H), 3.73–3.84 (m, 1H), 4.20 (dd,  $J$  = 7.2 Hz,  $J$  = 6.1 Hz, 1H), 5.20–5.33 (m, 1H), 5.38–5.58 (m, 2H), 5.90–6.10 (m, 1H), 7.41–7.52 (m, 2H), 7.64–7.83 (m, 2H) ppm;  $^{13}C$  NMR (75.5 MHz,  $CDCl_3$ )  $\delta$  43.2, 51.6, 65.8, 120.1, 124.3, 126.3, 128.9, 133.2, 135.9, 136.3, 152.1, 201.0 ppm; HRMS (EI) Calcd  $m/z$  for  $C_{12}H_{13}NO_3S [M]^+$ : 251.0616. Found: 251.0615.

**(*Z*)-4-Methyl-*N*-(1-vinylisochroman-3-ylidene)benzenesulfonamide (4a).**

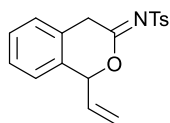

Yield: 66%; Eluent: *n*-hexane/ethyl acetate = 3/1; White solid;  $^1H$  NMR (300 MHz,  $CDCl_3$ )  $\delta$  2.04 (s, 3H), 3.58–3.84 (m, 1.67H), 4.16–4.73 (brs, 0.26H), 5.26 (d,  $J$  = 16.7 Hz, 1H), 5.42 (d,  $J$  = 10.0 Hz, 1H), 5.76–6.09 (m, 2H), 7.12–7.44 (m, 6H), 7.81–7.94 (m, 2H) ppm;  $^{13}C$  NMR (75.5 MHz,  $CDCl_3$ )  $\delta$  21.6, 35.4, 83.5, 120.5, 125.1, 127.5, 127.8, 129.0, 129.3, 129.4, 129.7, 132.2, 132.5, 138.5, 143.4, 168.1 ppm; HRMS (FAB) Calcd  $m/z$  for  $C_{18}H_{18}NO_3S [M+H]^+$ : 328.1007. Found: 328.1010.

**(*Z*)-4-Methyl-*N*-((3-vinylisobenzofuran-1(3*H*)-ylidene)methyl)benzenesulfonamide (5a).**

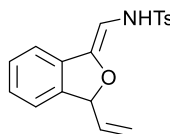

Yield: 80%; Eluent: *n*-hexane/ethyl acetate = 6/1; Yellow oil;  $^1H$  NMR (300 MHz,  $CDCl_3$ )  $\delta$  2.37 (s, 3H), 5.12–5.27 (m, 1H), 5.27–5.42 (m, 1H), 5.60–5.81 (m, 2H), 6.03 (d,  $J$  = 10.3 Hz, 1H), 6.37 (d,  $J$  = 10.3 Hz, 1H), 7.03–7.18 (m, 1H), 7.21–7.34 (m, 5H), 7.78 (d,  $J$  = 8.31, 2H) ppm;  $^{13}C$  NMR (75.5 MHz,  $CDCl_3$ )  $\delta$  21.5, 86.6, 95.0, 117.9, 118.8, 122.0, 127.0, 128.5, 128.6, 129.7, 131.8, 135.4, 137.0, 140.7, 143.5, 145.1 ppm; HRMS (EI) Calcd  $m/z$  for  $C_{18}H_{17}NO_3S [M]^+$ : 327.0929. Found: 327.0928.

## 12. X-ray Crystal Structure and Data of 2a

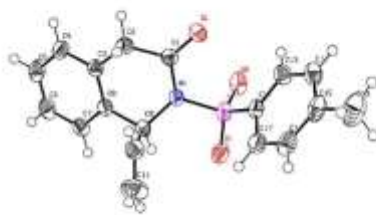

|                                   |                                                    |                  |
|-----------------------------------|----------------------------------------------------|------------------|
| Empirical formula                 | C <sub>18</sub> H <sub>17</sub> N O <sub>3</sub> S |                  |
| Formula weight                    | 327.39                                             |                  |
| Temperature                       | 223(2) K                                           |                  |
| Wavelength                        | 0.71073 Å                                          |                  |
| Crystal system                    | Triclinic                                          |                  |
| Space group                       | P-1                                                |                  |
| Unit cell dimensions              | a = 8.3301(5) Å                                    | α = 106.868(2)°. |
|                                   | b = 10.1313(5) Å                                   | β = 106.256(2)°. |
|                                   | c = 10.5314(6) Å                                   | γ = 99.042(2)°.  |
| Volume                            | 788.58(8) Å <sup>3</sup>                           |                  |
| Z                                 | 2                                                  |                  |
| Density (calculated)              | 1.379 Mg/m <sup>3</sup>                            |                  |
| Absorption coefficient            | 0.220 mm <sup>-1</sup>                             |                  |
| F(000)                            | 344                                                |                  |
| Crystal size                      | 0.19 x 0.15 x 0.10 mm <sup>3</sup>                 |                  |
| Theta range for data collection   | 2.15 to 28.34°.                                    |                  |
| Index ranges                      | -11 ≤ h ≤ 11, -13 ≤ k ≤ 13, -14 ≤ l ≤ 14           |                  |
| Reflections collected             | 33101                                              |                  |
| Independent reflections           | 3937 [R(int) = 0.0268]                             |                  |
| Completeness to theta = 28.34°    | 100.0 %                                            |                  |
| Absorption correction             | Semi-empirical from equivalents                    |                  |
| Max. and min. transmission        | 0.9784 and 0.9594                                  |                  |
| Refinement method                 | Full-matrix least-squares on F <sup>2</sup>        |                  |
| Data / restraints / parameters    | 3937 / 0 / 209                                     |                  |
| Goodness-of-fit on F <sup>2</sup> | 1.048                                              |                  |
| Final R indices [I > 2σ(I)]       | R1 = 0.0389, wR2 = 0.1055                          |                  |
| R indices (all data)              | R1 = 0.0458, wR2 = 0.1112                          |                  |
| Largest diff. peak and hole       | 0.394 and -0.227 e.Å <sup>-3</sup>                 |                  |



### 13. X-ray Crystal Structure and Data of 3a

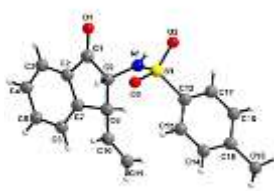

|                                     |                                                                                                                                                    |
|-------------------------------------|----------------------------------------------------------------------------------------------------------------------------------------------------|
| Chemical formula                    | $C_{18}H_{17}NO_3S$                                                                                                                                |
| Formula weight                      | 327.38                                                                                                                                             |
| Temperature                         | 296(2) K                                                                                                                                           |
| Wavelength                          | 0.71073 Å                                                                                                                                          |
| Crystal size                        | 0.100 x 0.200 x 0.280 mm                                                                                                                           |
| Crystal habit                       | colorless plate                                                                                                                                    |
| Crystal system                      | triclinic                                                                                                                                          |
| Space group                         | P -1                                                                                                                                               |
| Unit cell dimensions                | $a = 9.4401(2)$ Å $\alpha = 64.5184(10)^\circ$<br>$b = 9.7860(2)$ Å $\beta = 74.1018(11)^\circ$<br>$c = 10.7338(2)$ Å $\gamma = 69.7646(10)^\circ$ |
| Volume                              | 830.67(3) Å <sup>3</sup>                                                                                                                           |
| Z                                   | 2                                                                                                                                                  |
| Density (calculated)                | 1.309 g/cm <sup>3</sup>                                                                                                                            |
| Absorption coefficient              | 0.209 mm <sup>-1</sup>                                                                                                                             |
| F(000)                              | 344                                                                                                                                                |
| Theta range for data collection     | 2.13 to 28.54°                                                                                                                                     |
| Index ranges                        | -12 ≤ h ≤ 12, -13 ≤ k ≤ 13, -14 ≤ l ≤ 14                                                                                                           |
| Reflections collected               | 29279                                                                                                                                              |
| Independent reflections             | 4207 [R(int) = 0.0338]                                                                                                                             |
| Coverage of independent reflections | 99.3%                                                                                                                                              |
| Absorption correction               | multi-scan                                                                                                                                         |
| Max. and min. transmission          | 0.9790 and 0.9440                                                                                                                                  |
| Refinement method                   | Full-matrix least-squares on F <sup>2</sup>                                                                                                        |
| Refinement program                  | SHELXL-2013 (Sheldrick, 2013)                                                                                                                      |
| Function minimized                  | $\sum w(F_o^2 - F_c^2)^2$                                                                                                                          |
| Data / restraints / parameters      | 4207 / 0 / 209                                                                                                                                     |
| Goodness-of-fit on F2               | 1.028                                                                                                                                              |
| Final R indices                     | 3102 data; I > 2σ(I)    R1 = 0.0451, wR2 = 0.1092<br>all data    R1 = 0.0685, wR2 = 0.1243                                                         |
| Weighting scheme                    | $w = 1 / [\sigma^2(F_o^2) + (0.0569P)^2 + 0.2196P]$<br>where $P = (F_o^2 + 2F_c^2) / 3$                                                            |
| Largest diff. peak and hole         | 0.330 and -0.285 eÅ <sup>-3</sup>                                                                                                                  |
| R.M.S. deviation from mean          | 0.043 eÅ <sup>-3</sup>                                                                                                                             |

# 14. Copies of <sup>1</sup>H and <sup>13</sup>C NMR Spectra

## <sup>1</sup>H spectra of compound 1a

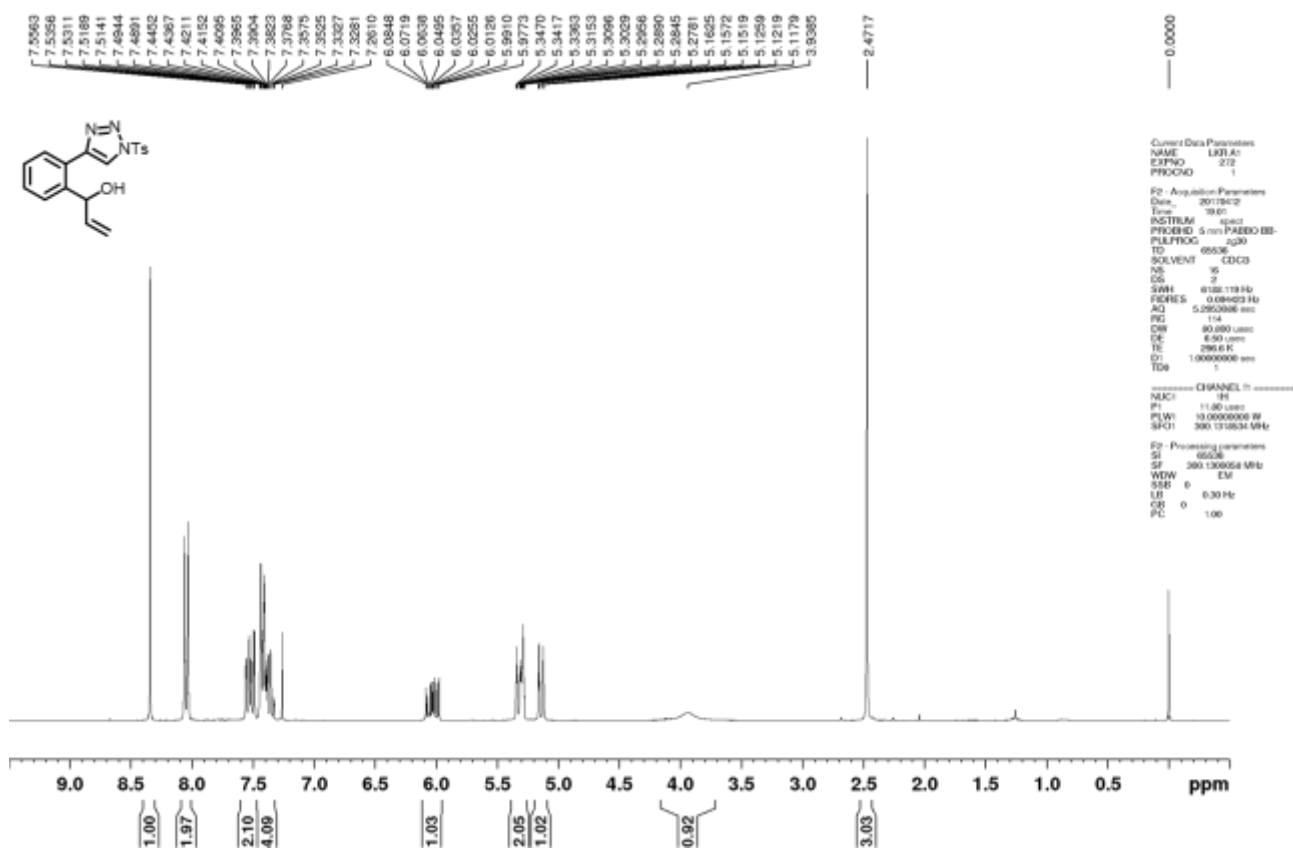

## <sup>13</sup>C spectra of compound 1a

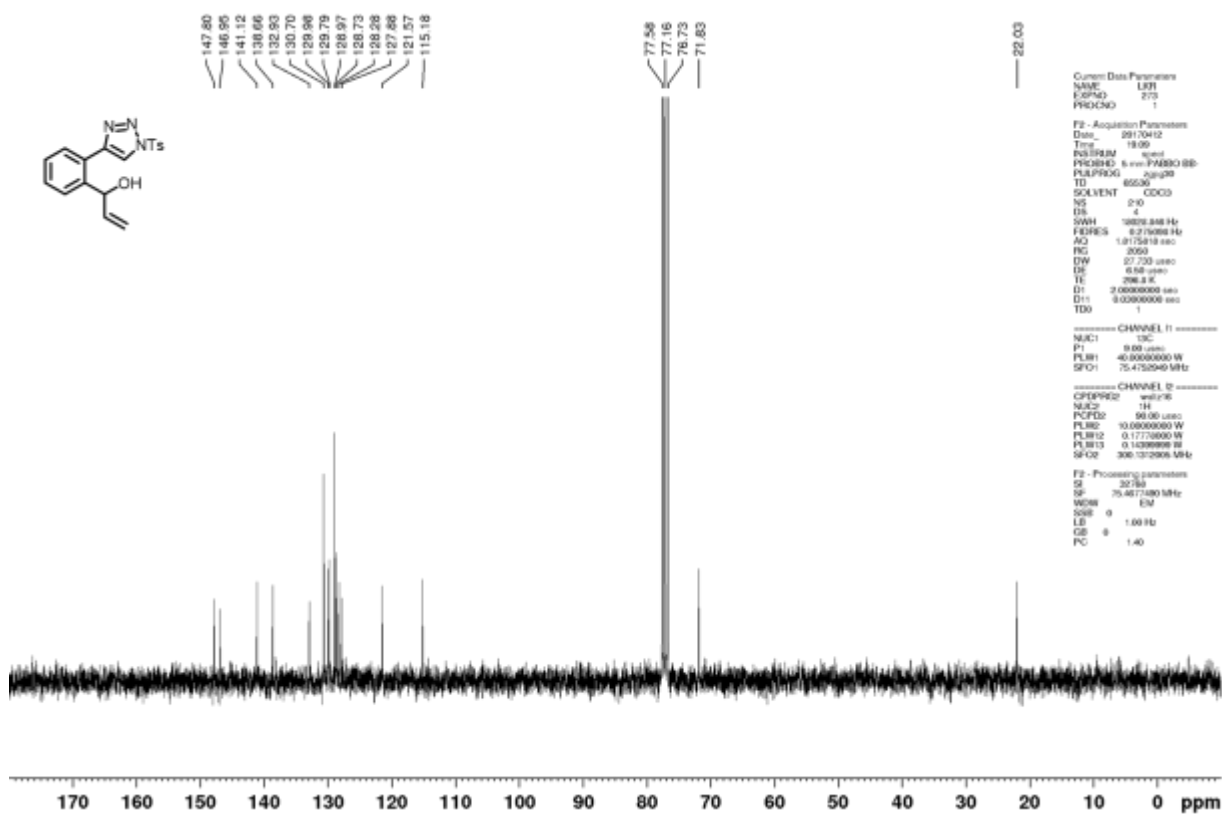

<sup>1</sup>H spectra of compound **1b**

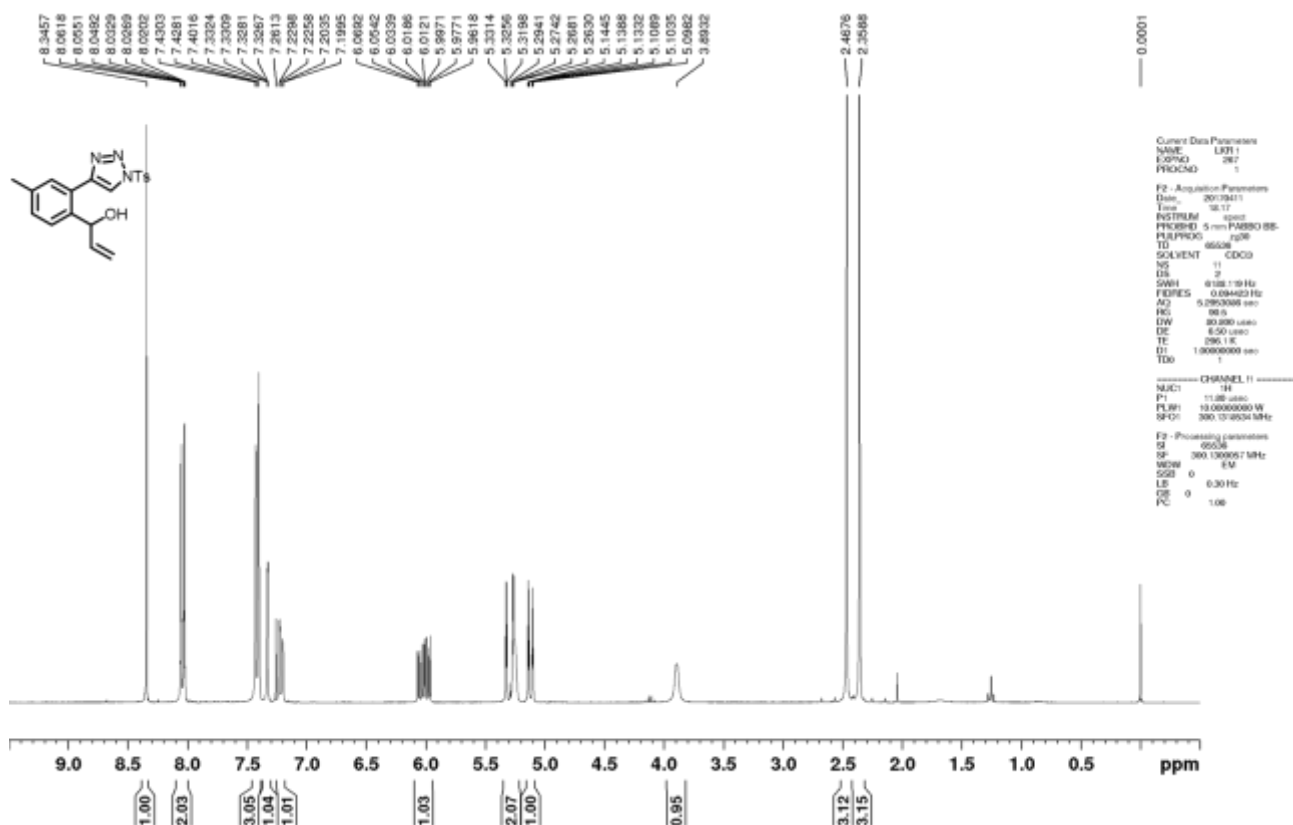

<sup>13</sup>C spectra of compound **1b**

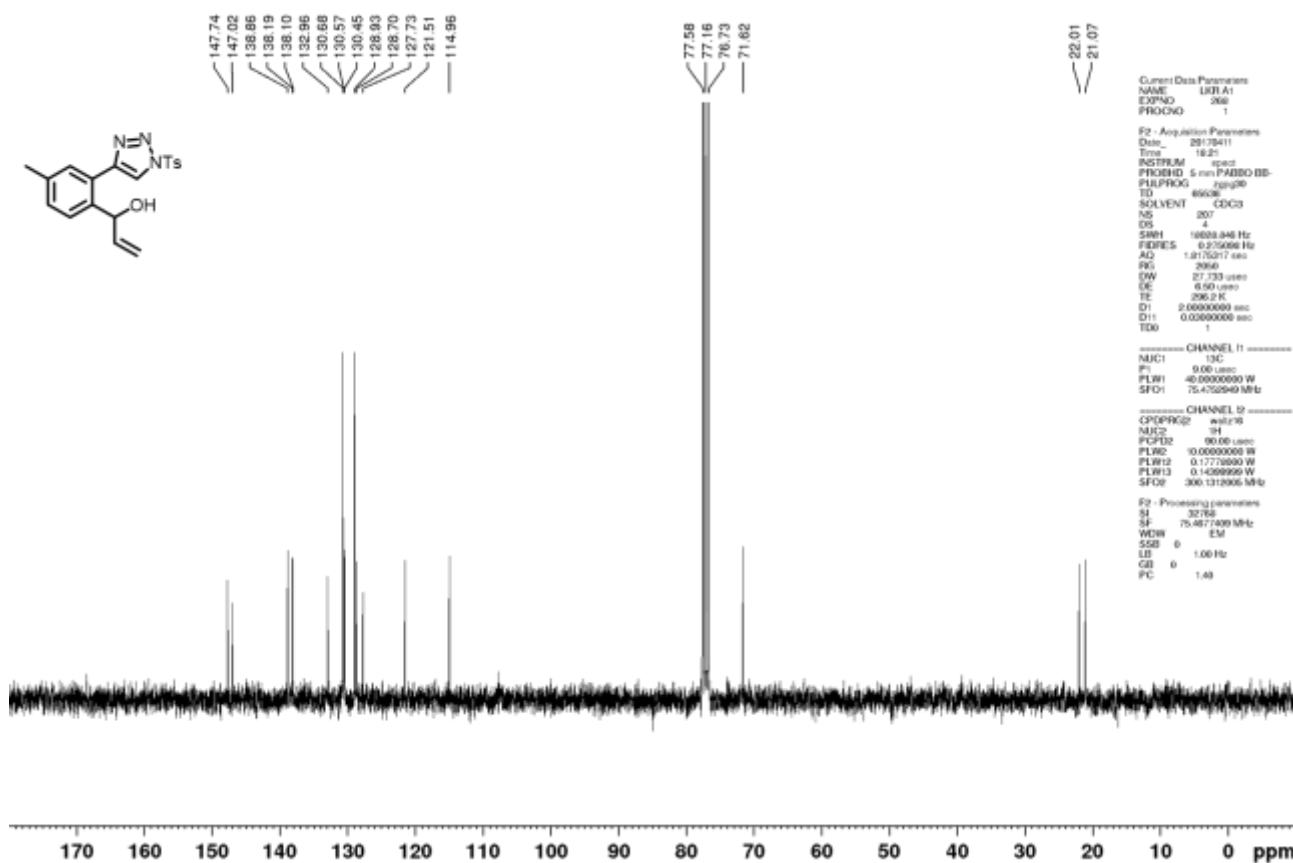

### <sup>1</sup>H spectra of compound 1c

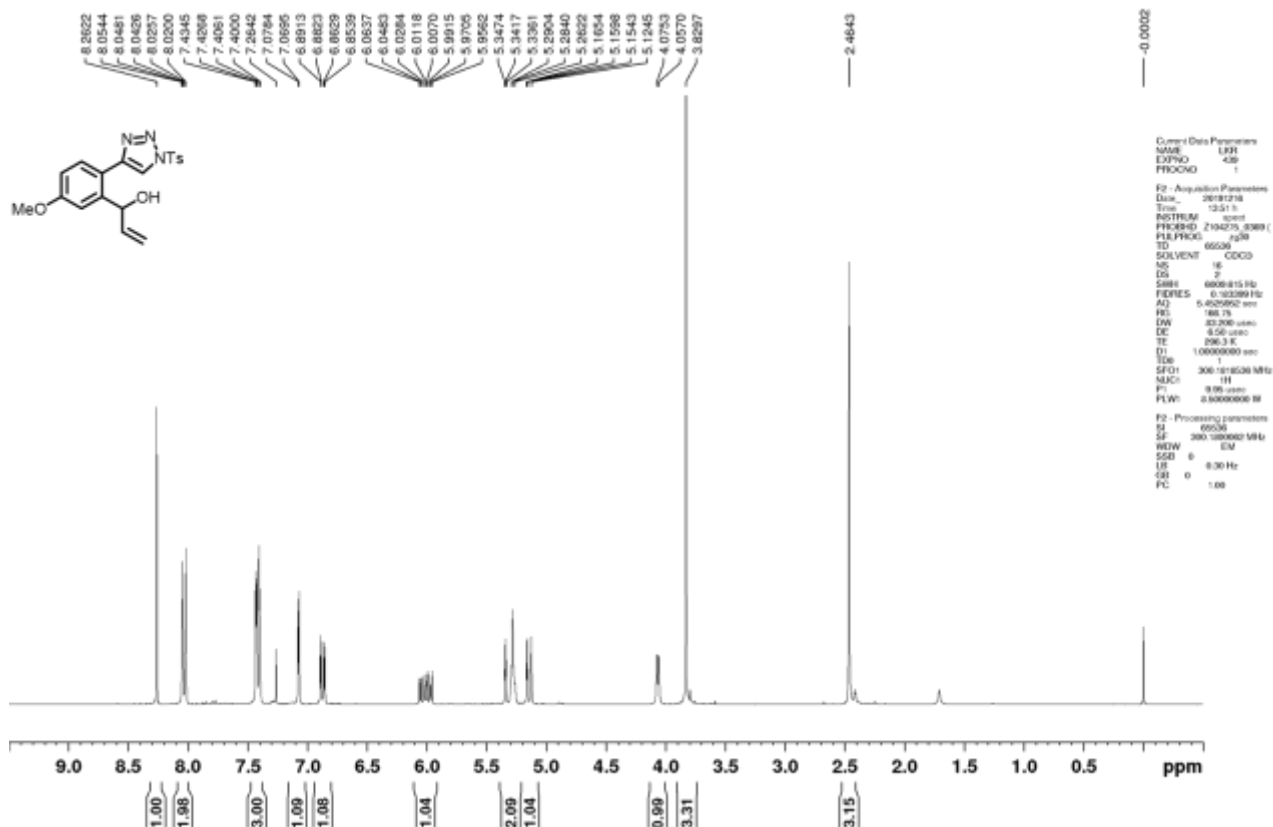

### <sup>13</sup>C spectra of compound 1c

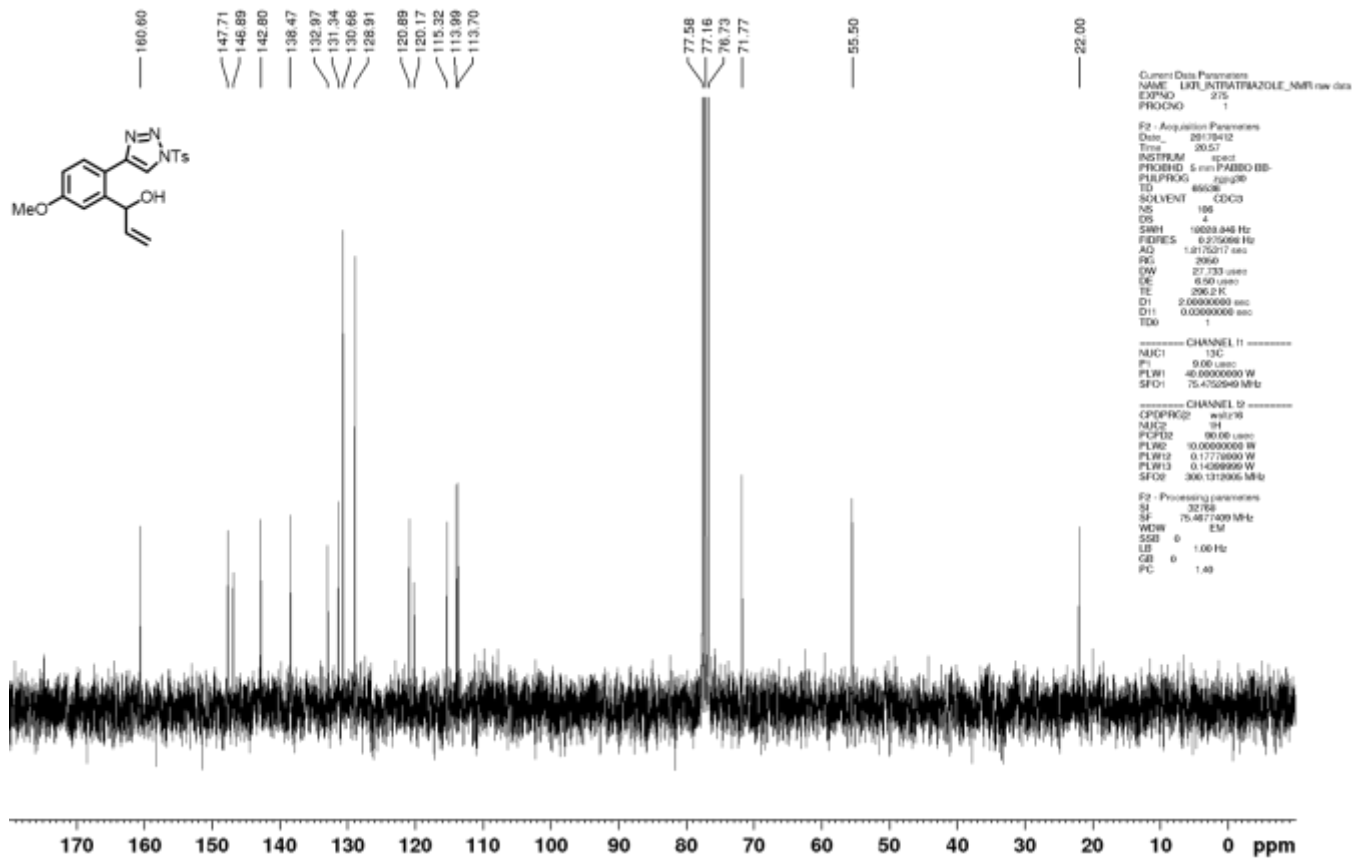

<sup>1</sup>H spectra of compound **1d**

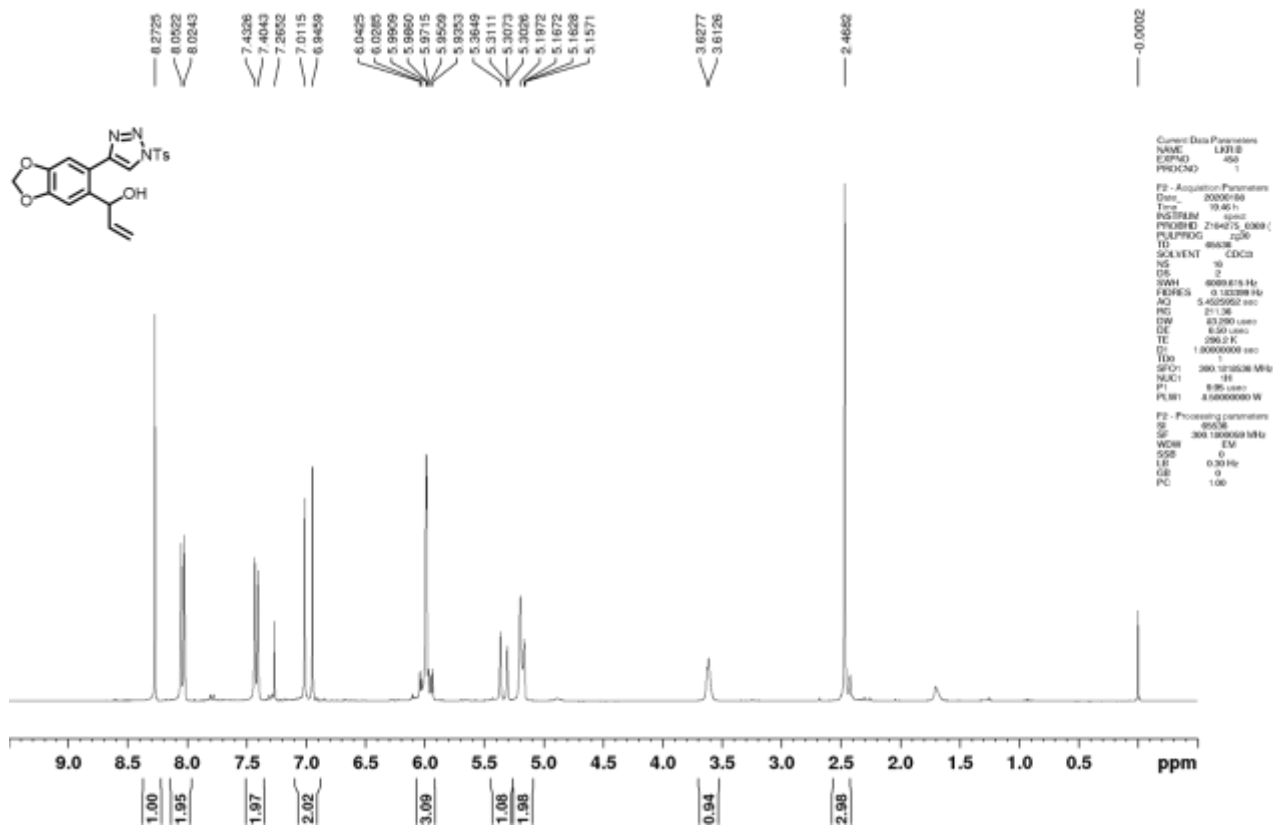

<sup>13</sup>C spectra of compound **1d**

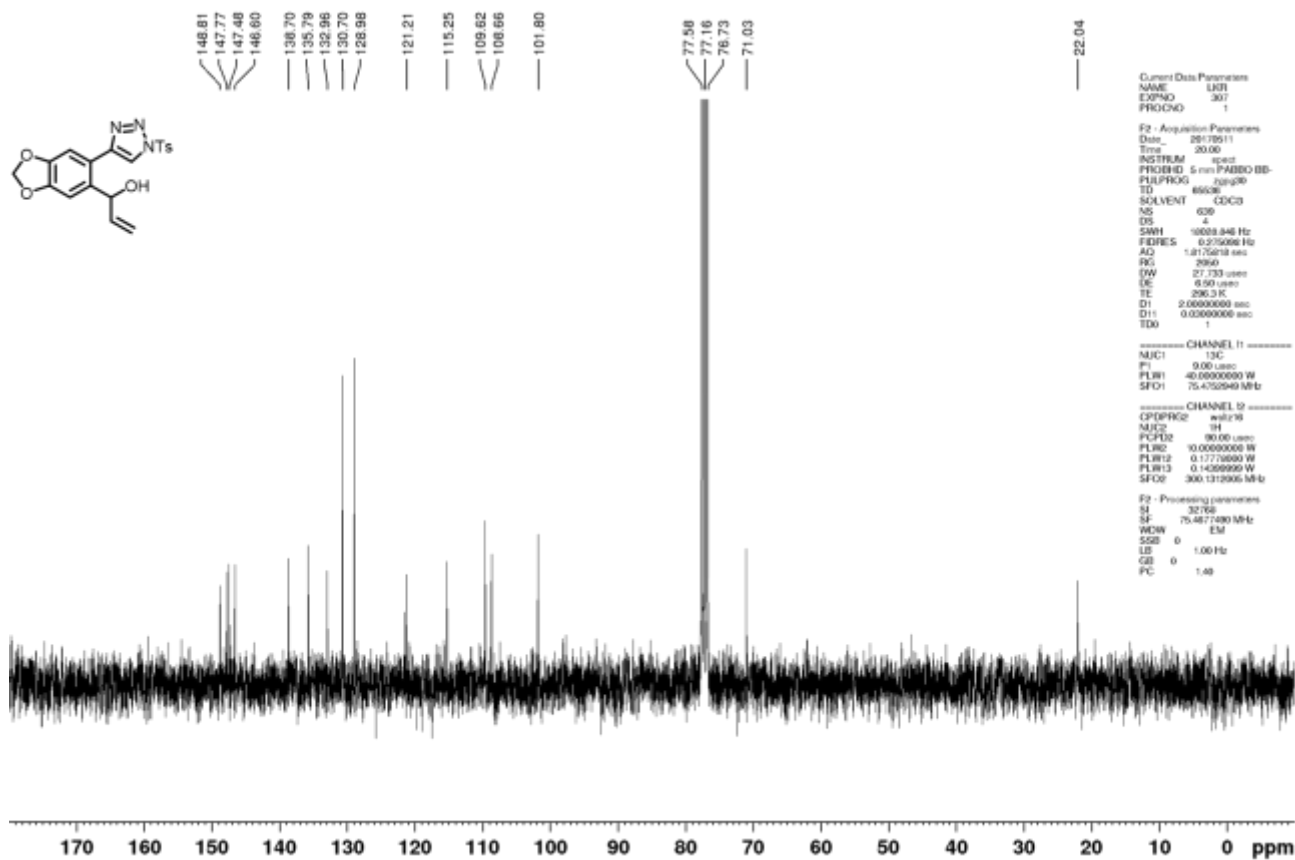

<sup>1</sup>H spectra of compound **1e**

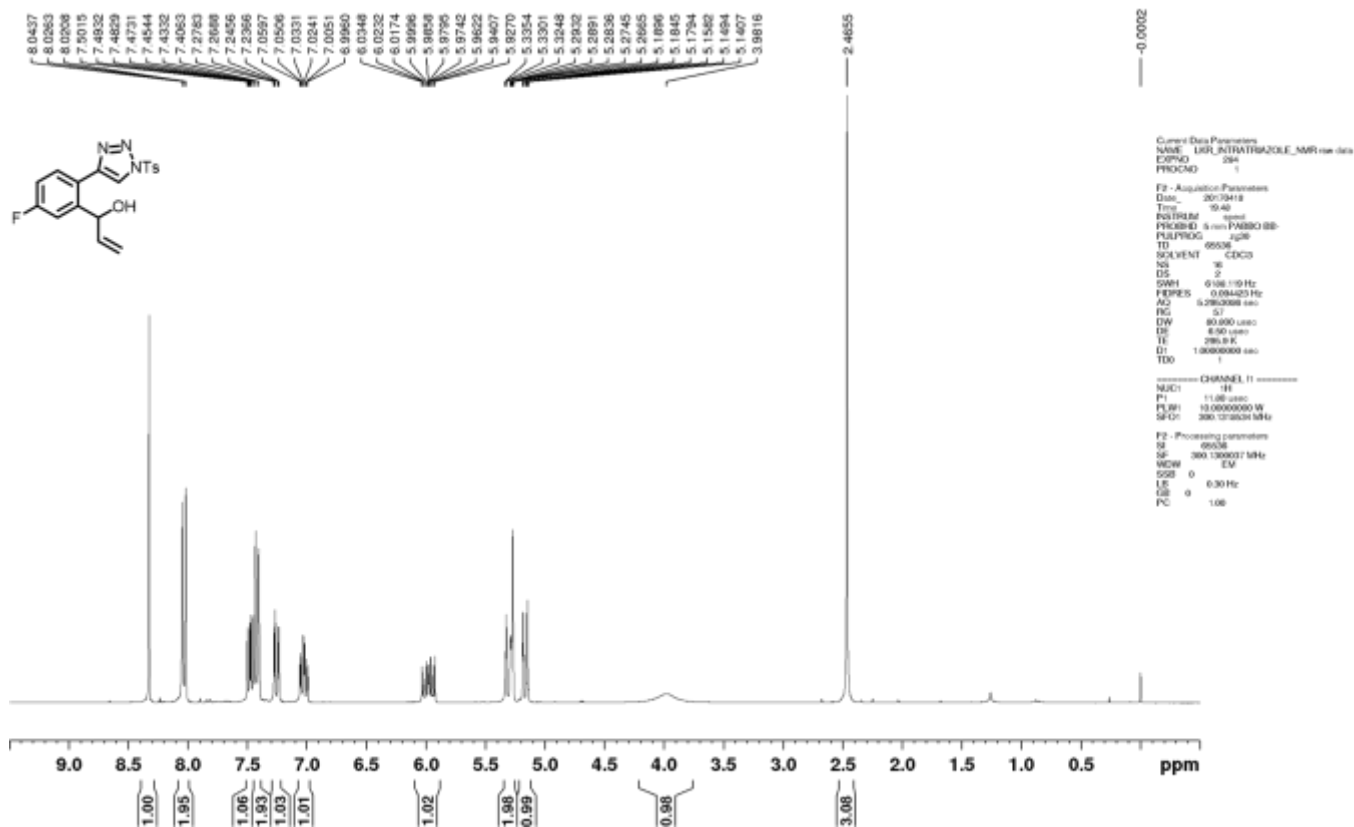

<sup>13</sup>C spectra of compound **1e**

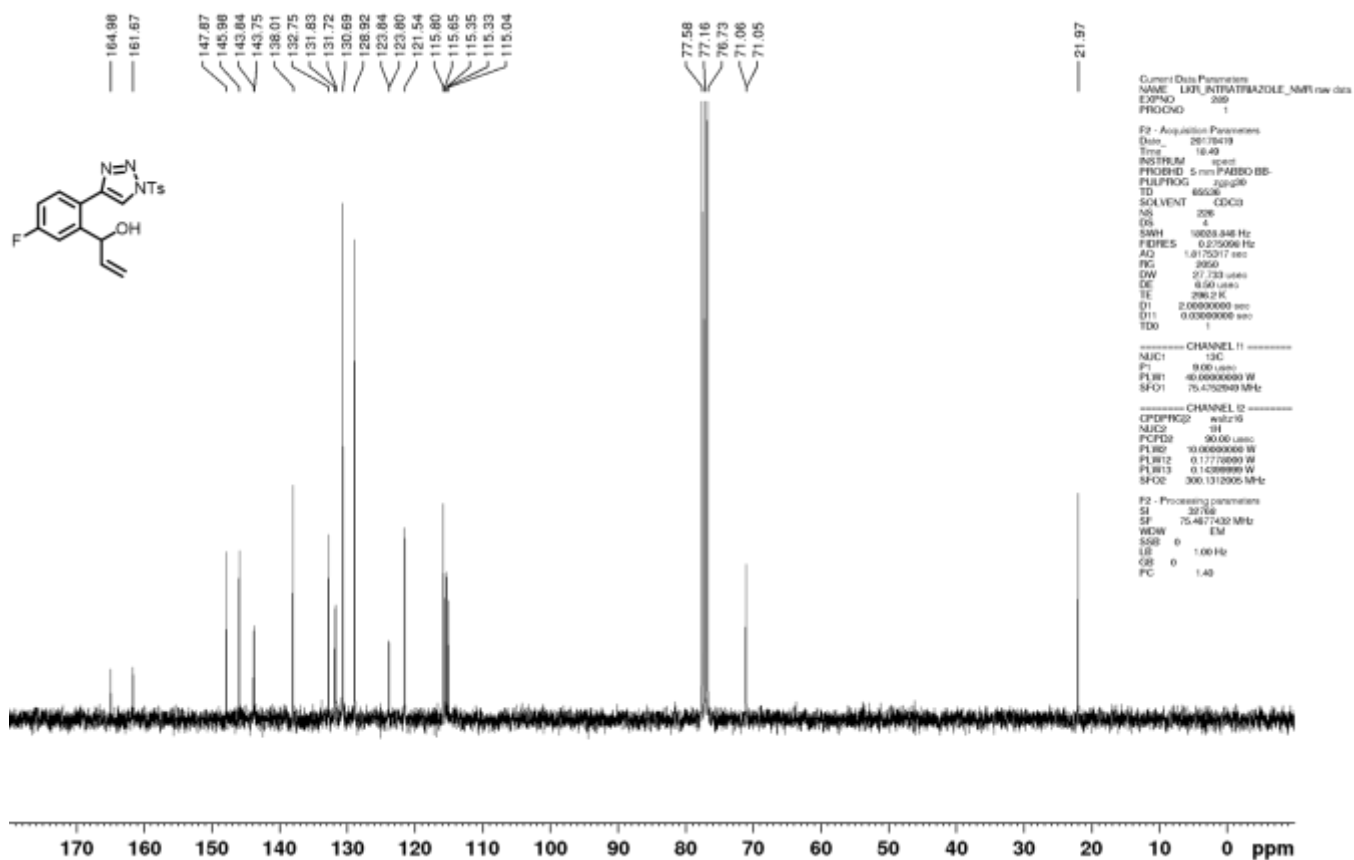

<sup>19</sup>F spectra of compound **1e**

Current Data Parameters  
NAME ASB  
EXPNO 400  
PROCNO 1

F2 - Acquisition Parameters  
Date\_ 20210504  
Time 17.35 h  
INSTRUM spect  
PROBHD Z104275\_0369 (   
PULPROG zg30  
TD 131072  
SOLVENT CDCl3  
NS 16  
DS 4  
SWE 66964.289 Hz  
FIDRES 1.021794 Hz  
AQ 0.9786710 sec  
RG 211.36  
DW 7.467 usec  
DE 6.50 usec  
TE 295.4 K  
D1 1.0000000 sec  
TD0 1  
SFO1 282.4231571 MHz  
NOC1 19F  
P1 15.00 usec  
PLW1 8.4000038 W

F2 - Processing parameters  
SI 65536  
SF 282.4514022 MHz  
WDW EM  
SSB 0  
LB 0.30 Hz  
GB 0  
PC 1.00

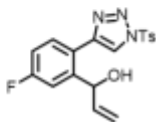

-111.0133  
-111.0460  
-111.0676  
-111.0977

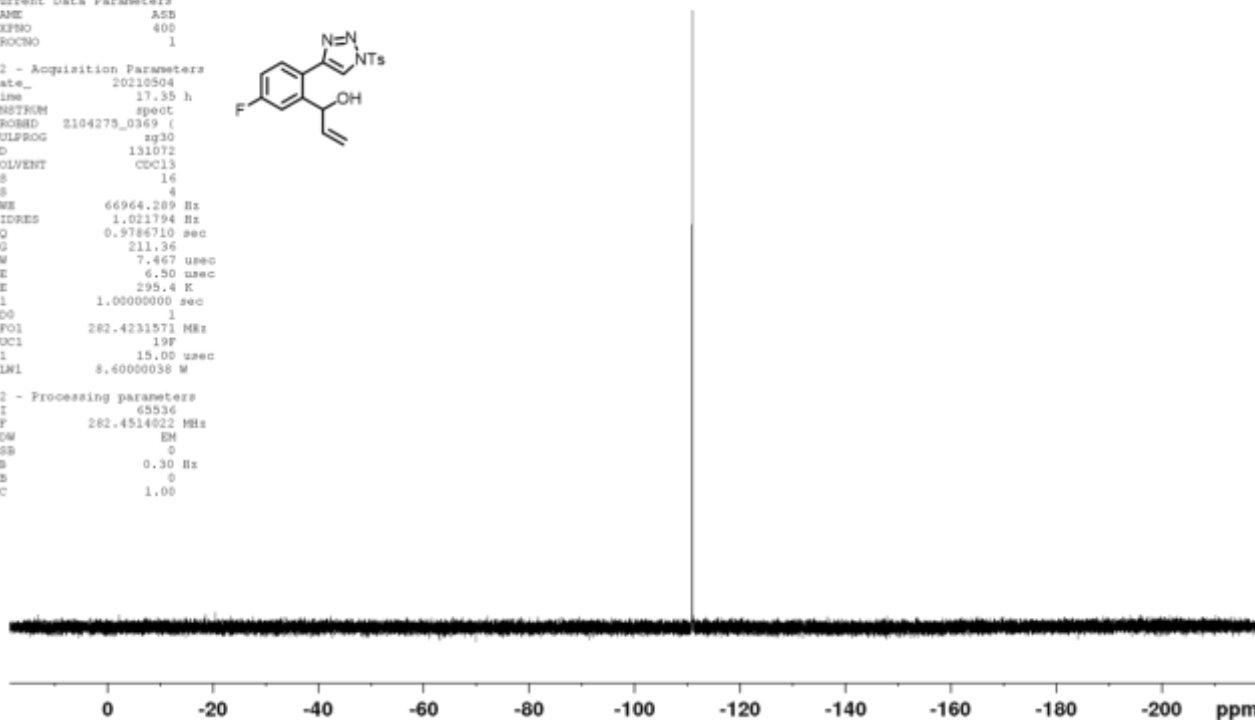

<sup>1</sup>H spectra of compound **1f**

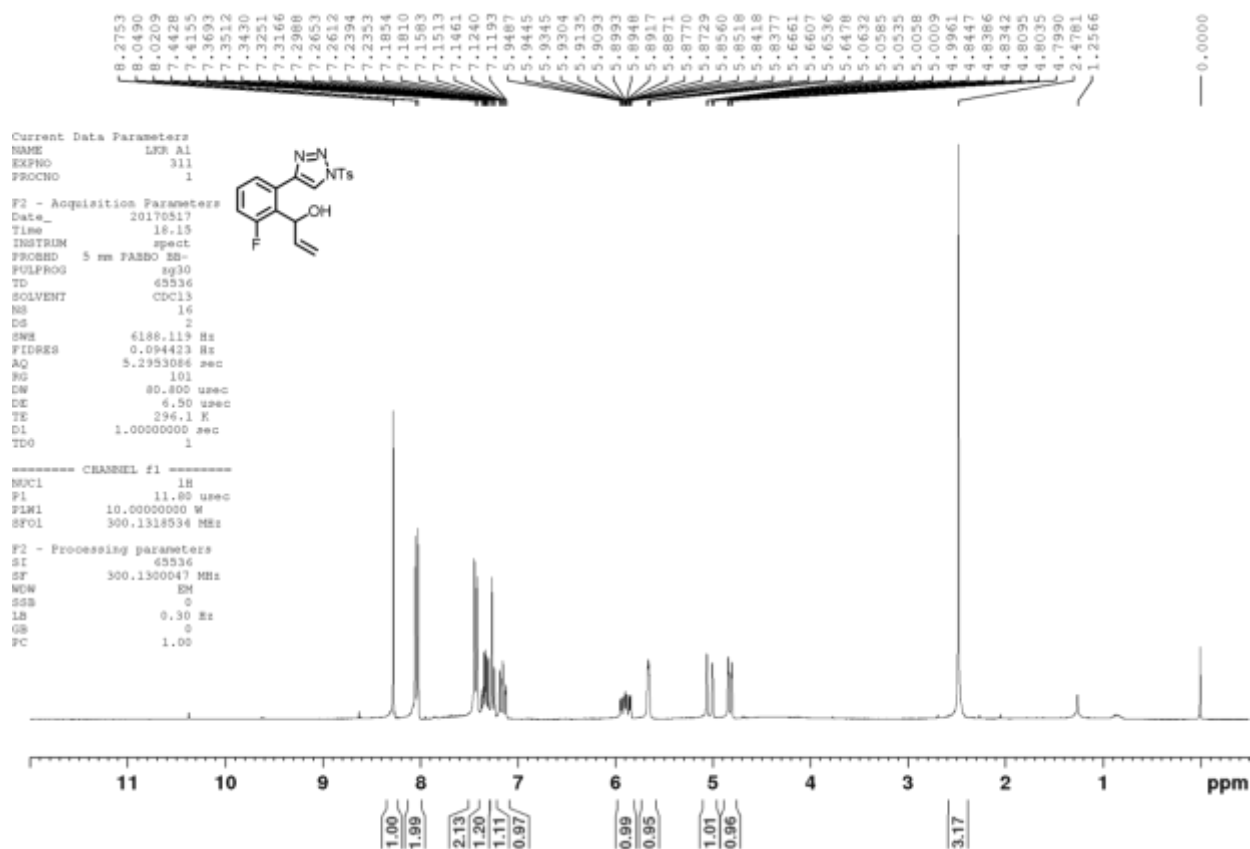

<sup>13</sup>C spectra of compound **1f**

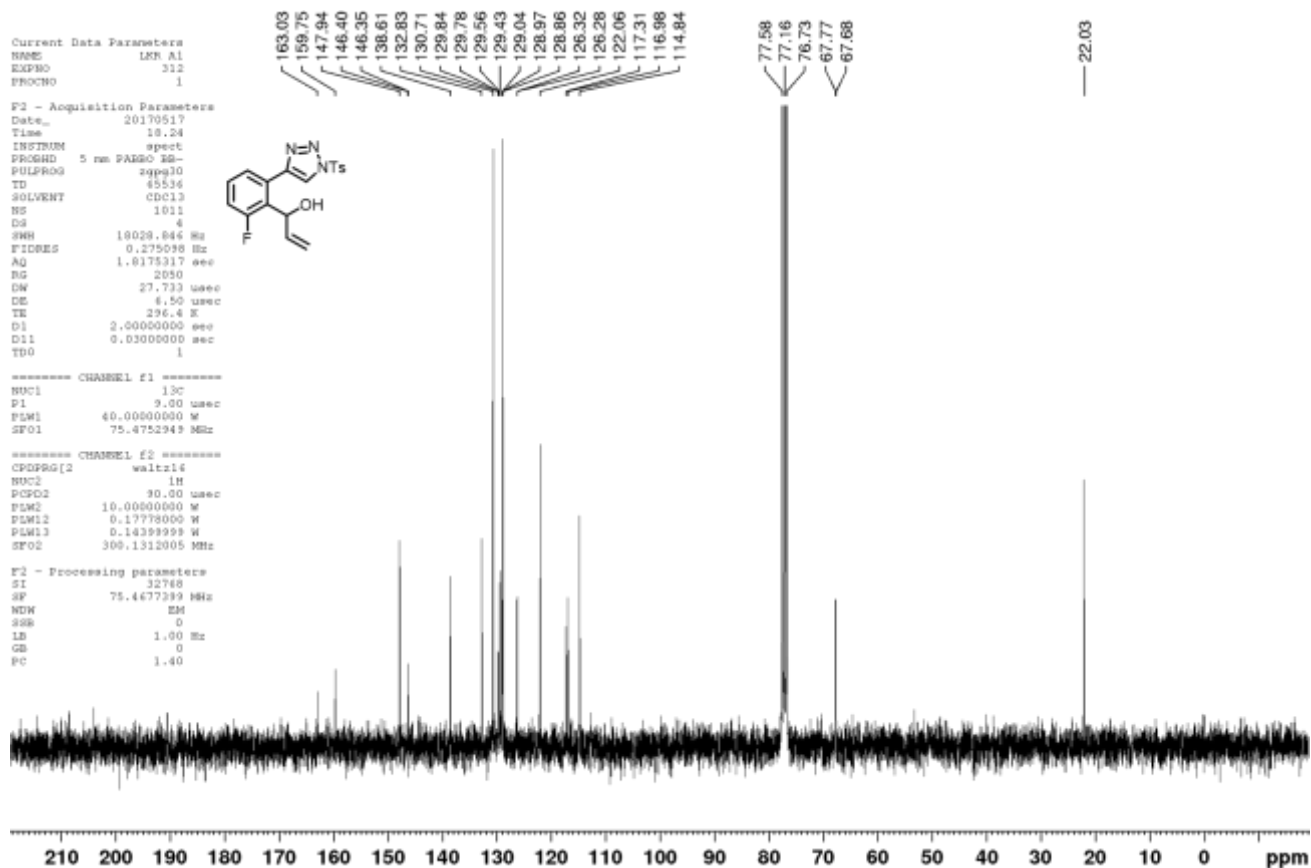



<sup>19</sup>F spectra of compound **1f**

Current Data Parameters  
NAME LKR B  
EXPNO 985  
PROCNO 1

F2 - Acquisition Parameters  
Date\_ 20210504  
Time 18.28 h  
INSTRUM spect  
PROBHD z104275\_0369 (   
PULPROG zg30  
TD 131072  
SOLVENT CDCl3  
NS 16  
DS 4  
SWE 66964.289 Hz  
FIDRES 1.021794 Hz  
AQ 0.9786710 sec  
RG 211.36  
DW 7.467 usec  
DE 6.50 usec  
TE 295.4 K  
D1 1.0000000 sec  
TDO 1  
SFO1 282.4231571 MHz  
NUC1 19F  
P1 15.00 usec  
PLW1 8.60000038 W

F2 - Processing parameters  
SI 65536  
SF 282.4514022 MHz  
WDW EM  
SSB 0  
LB 0.30 Hz  
GB 0  
PC 1.00

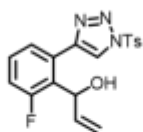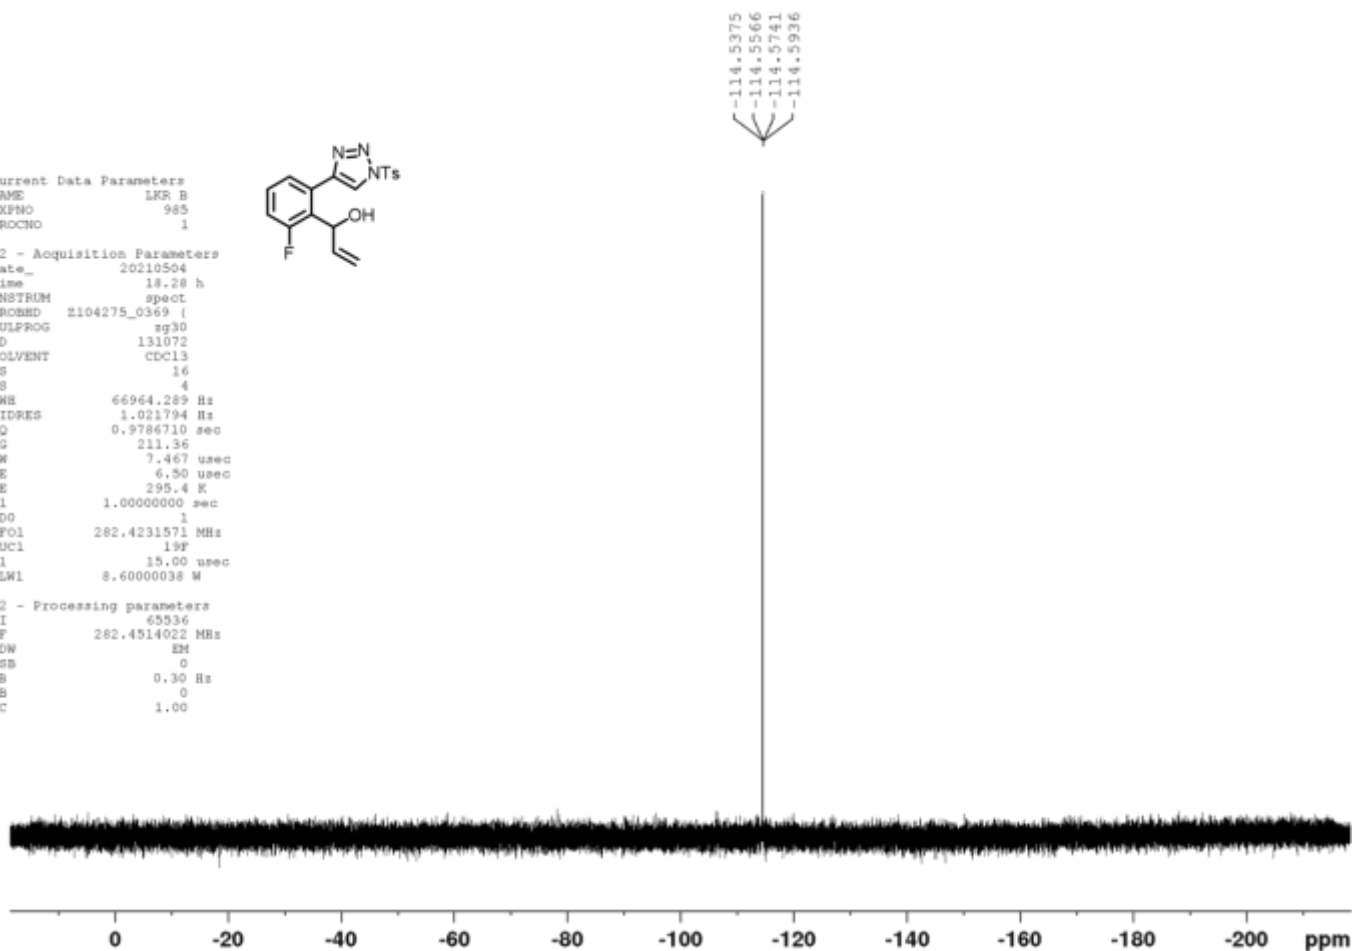

<sup>1</sup>H spectra of compound **1g**

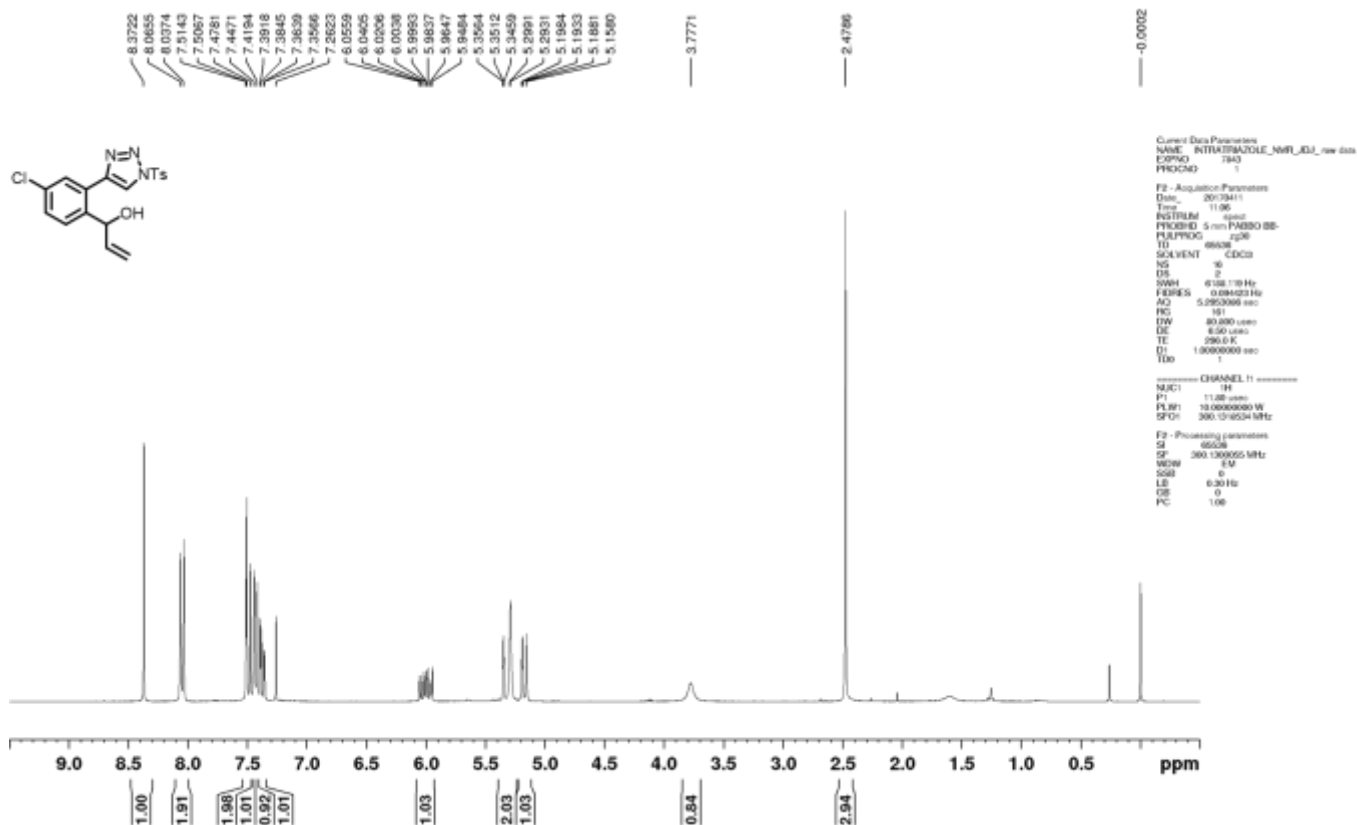

<sup>13</sup>C spectra of compound **1g**

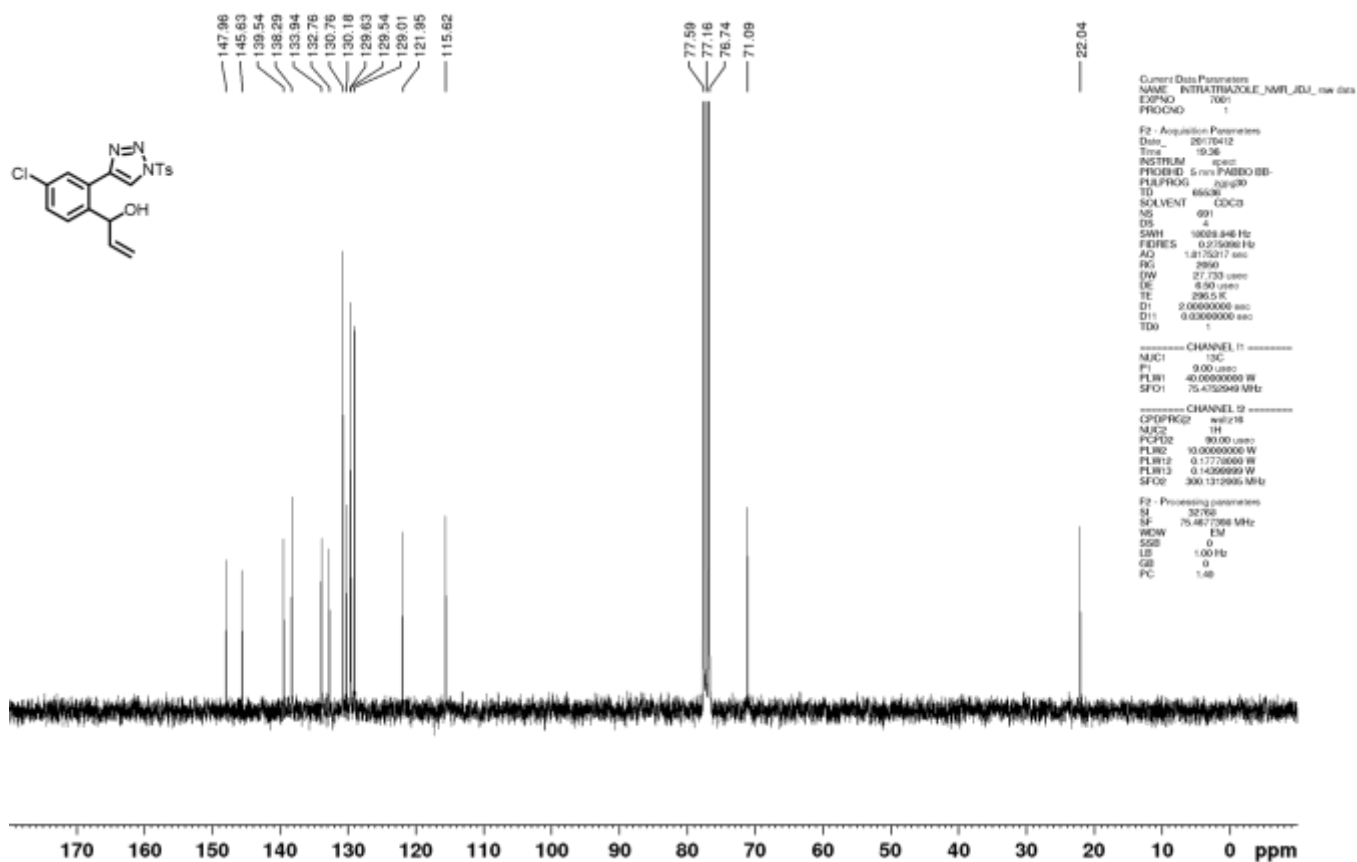

<sup>1</sup>H spectra of compound **1g**

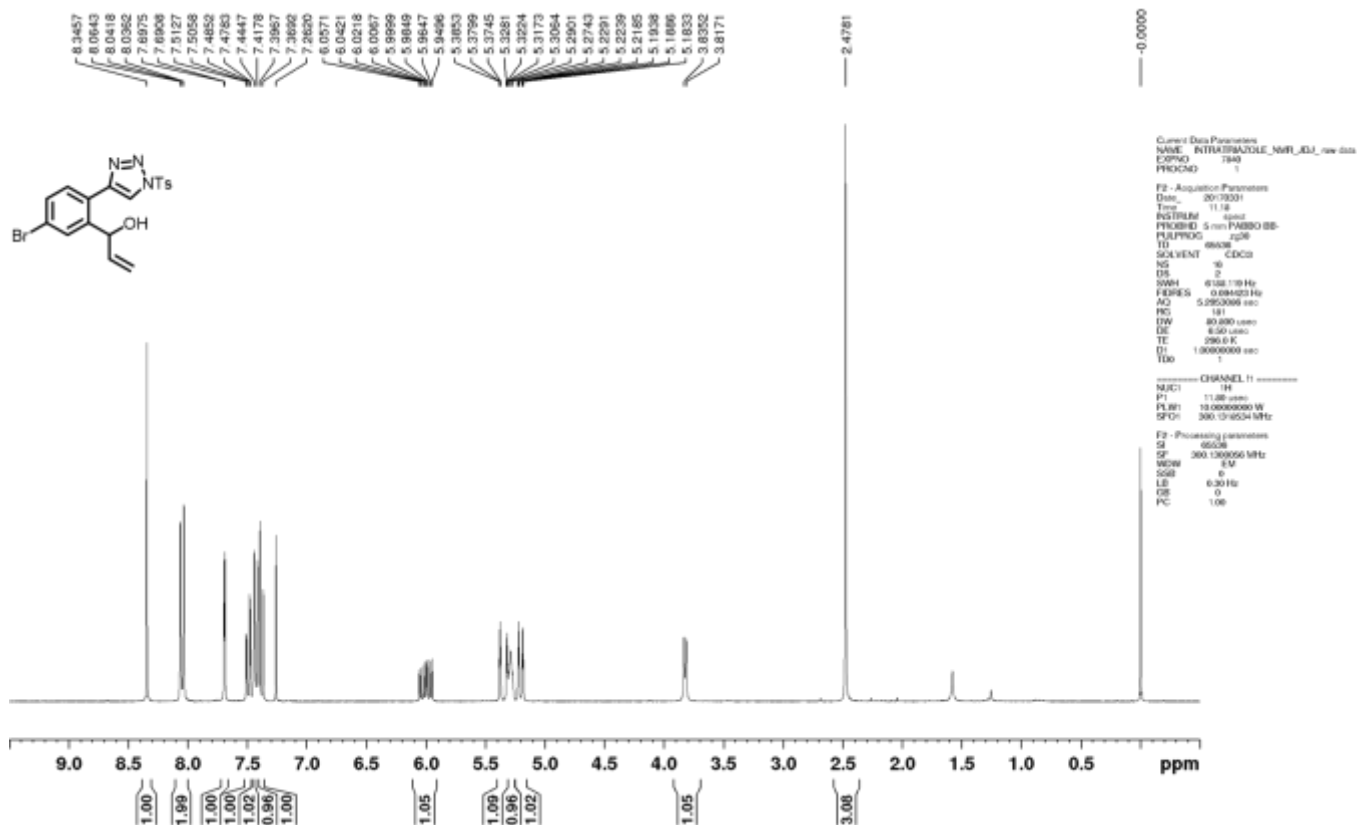

<sup>13</sup>C spectra of compound **1g**

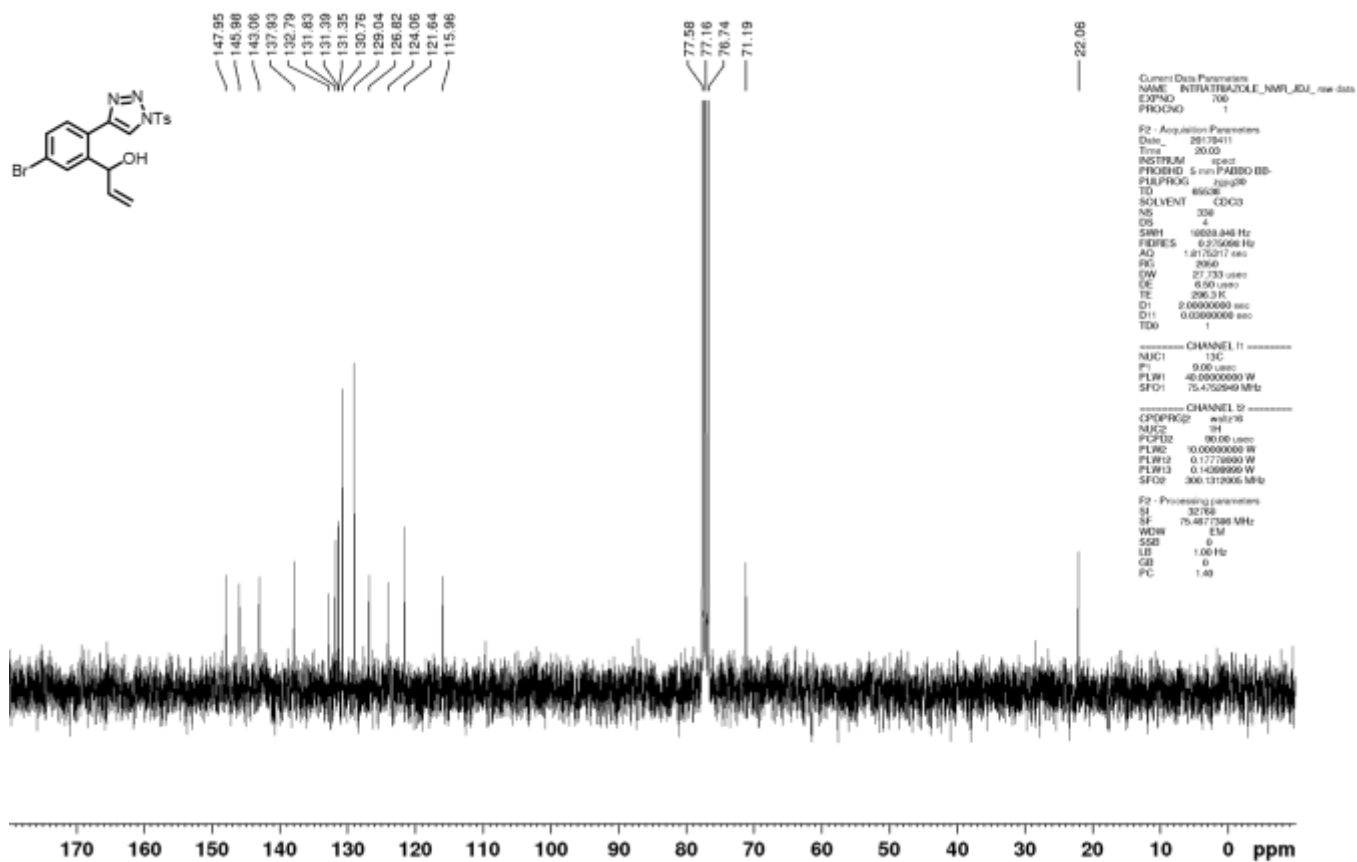

### <sup>1</sup>H spectra of compound **1i**

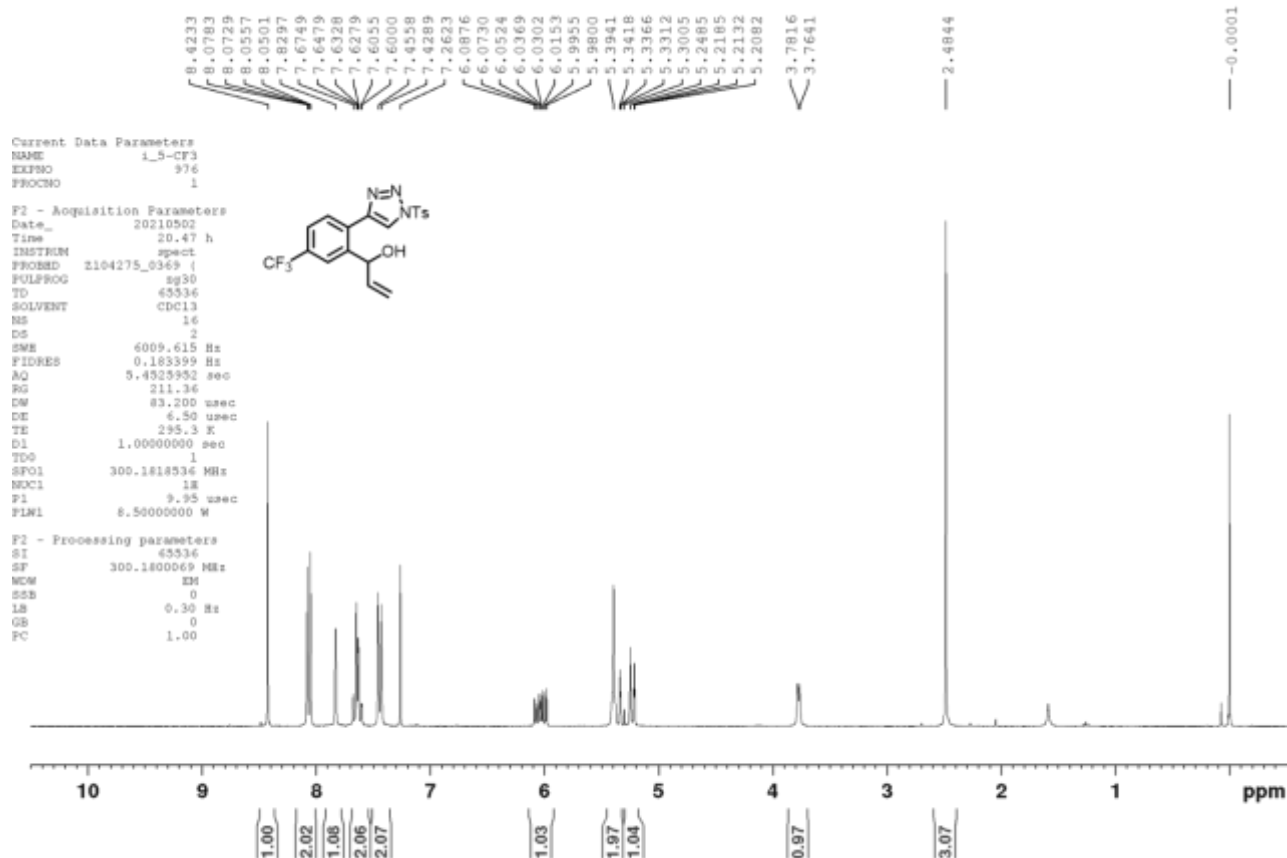

### <sup>13</sup>C spectra of compound **1i**

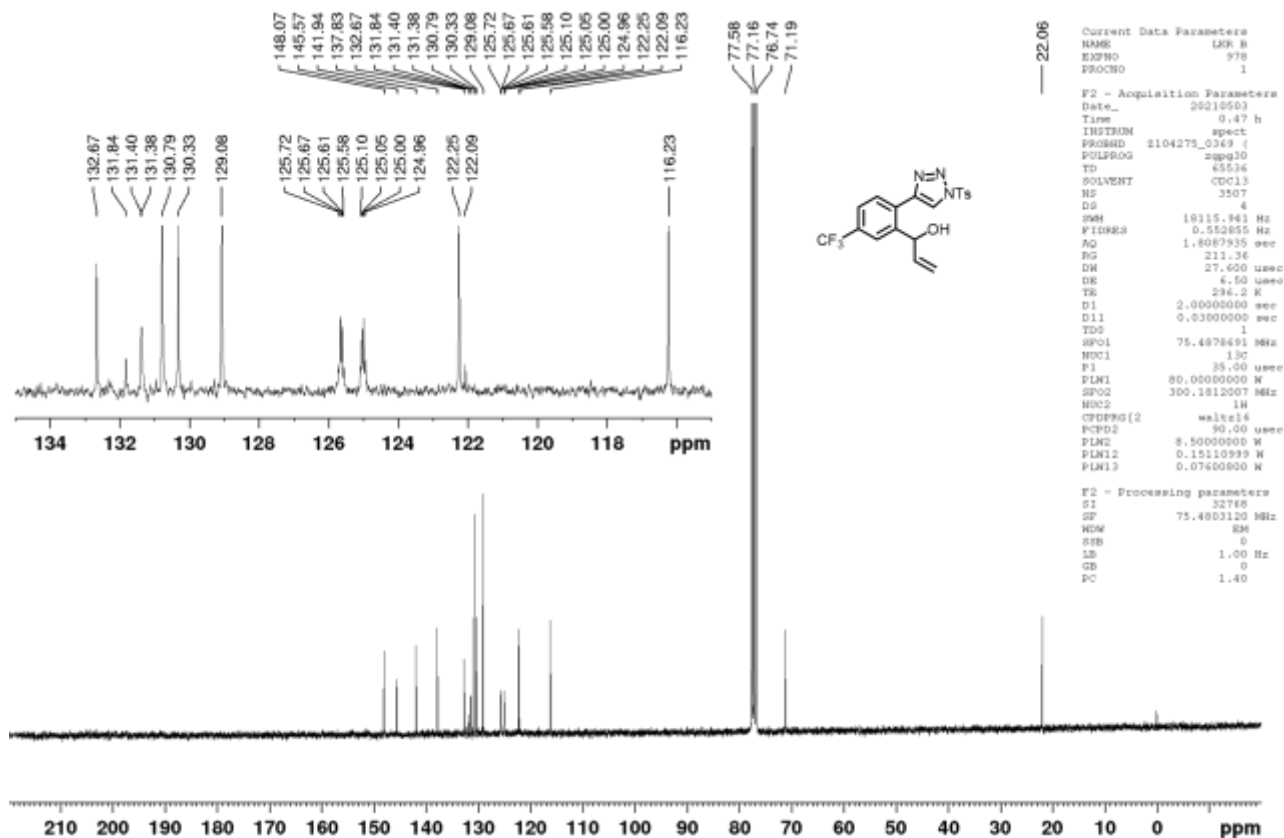

<sup>19</sup>F spectra of compound **1i**

Current Data Parameters  
NAME LKR B  
EXPNO 977  
PROCNO 1

F2 - Acquisition Parameters  
Date\_ 20210502  
Time 20.51 h  
INSTRUM spect  
PROBHD zg30  
PULPROG zg30  
TD 131072  
SOLVENT CDCl3  
NS 16  
DS 4  
SWH 66964.289 Hz  
FIDRES 1.021794 Hz  
AQ 0.9786710 sec  
RG 211.36  
DW 7.467 usec  
DE 6.50 usec  
TE 295.4 K  
D1 1.0000000 sec  
TDO 1  
SFO1 282.4231571 MHz  
NUC1 19F  
P1 15.00 usec  
PL1 8.60000038 W

F2 - Processing parameters  
SI 65536  
SF 282.4514022 MHz  
WDW EM  
SSB 0  
LB 0.30 Hz  
GB 0  
PC 1.00

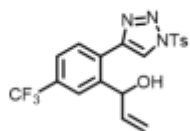

-62.7693

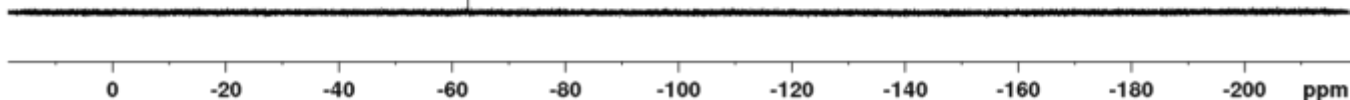

<sup>1</sup>H spectra of compound **1j**

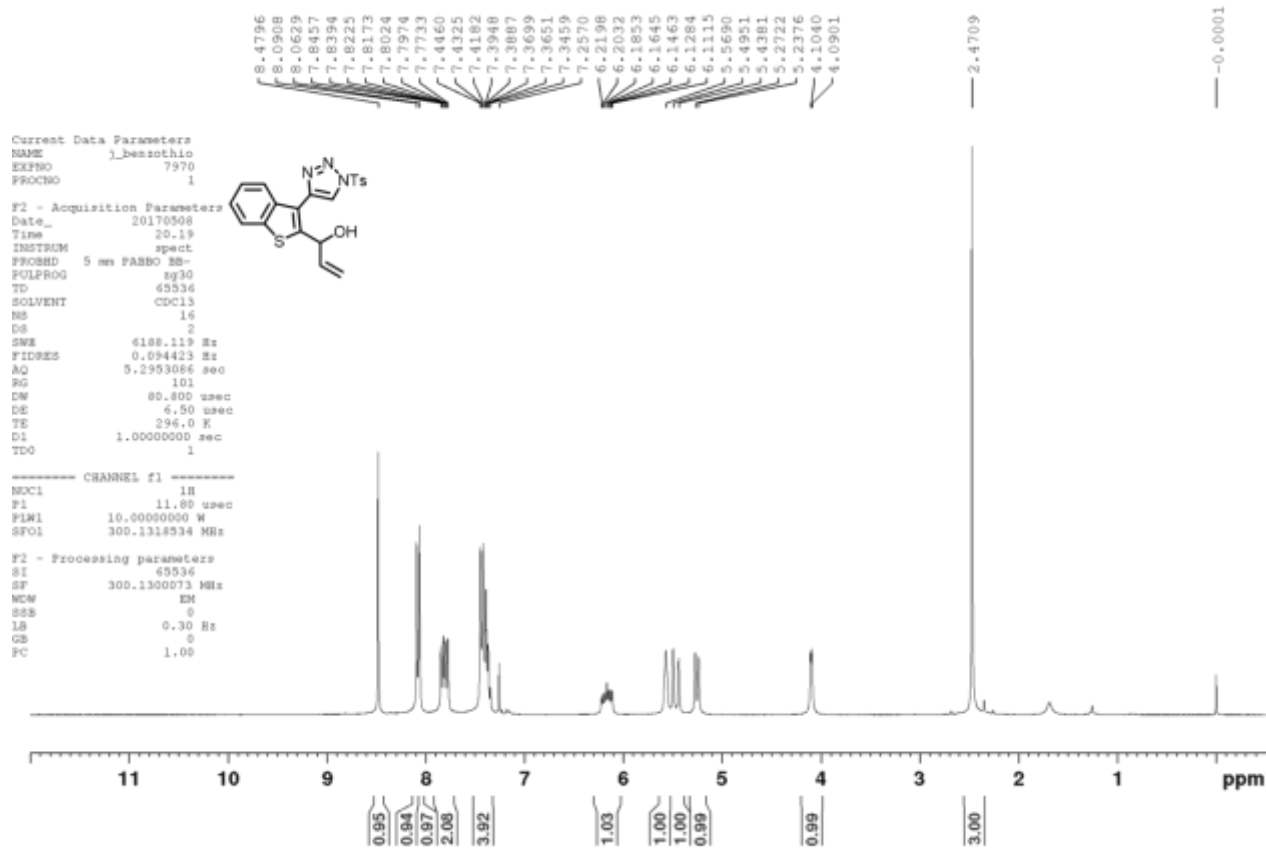

<sup>13</sup>C spectra of compound **1j**

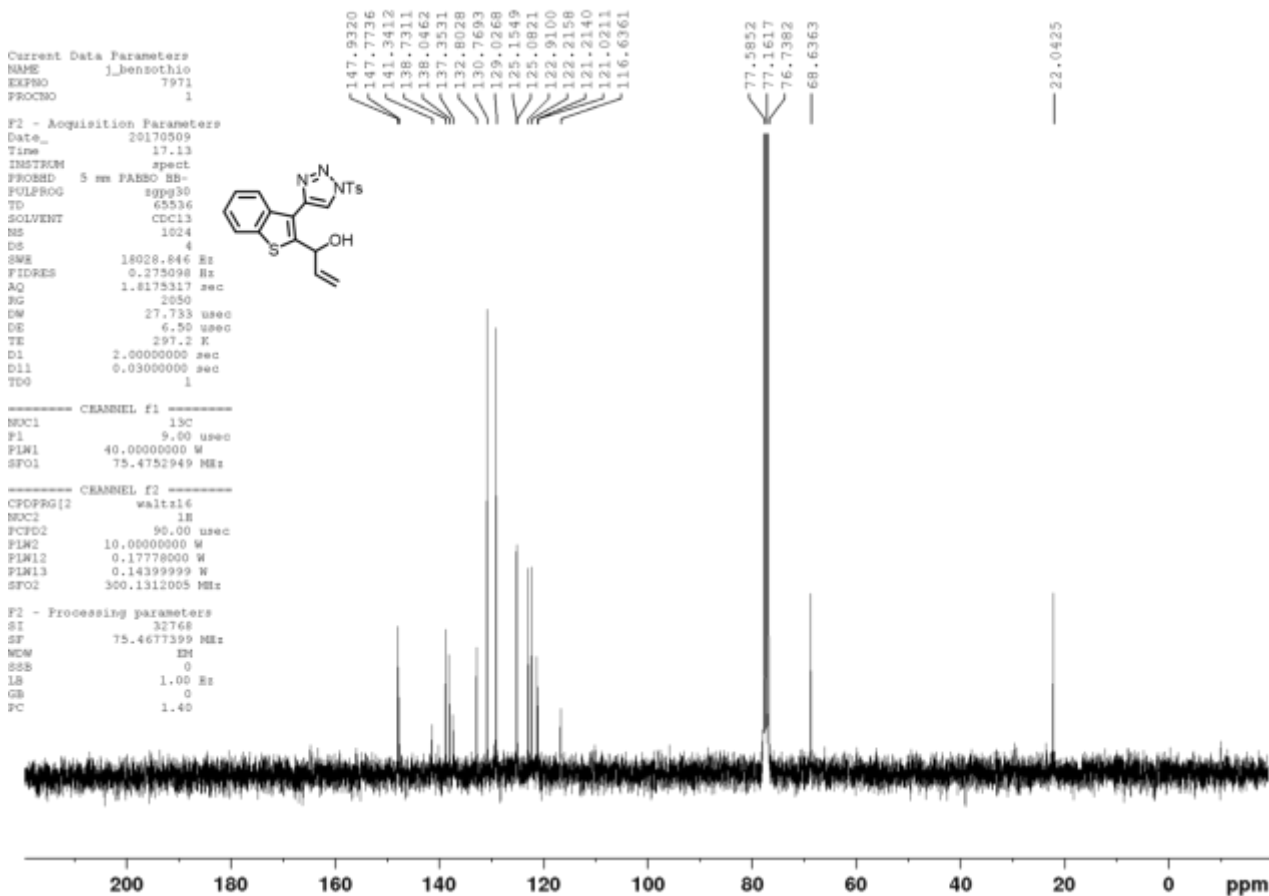

<sup>1</sup>H spectra of compound **1k**

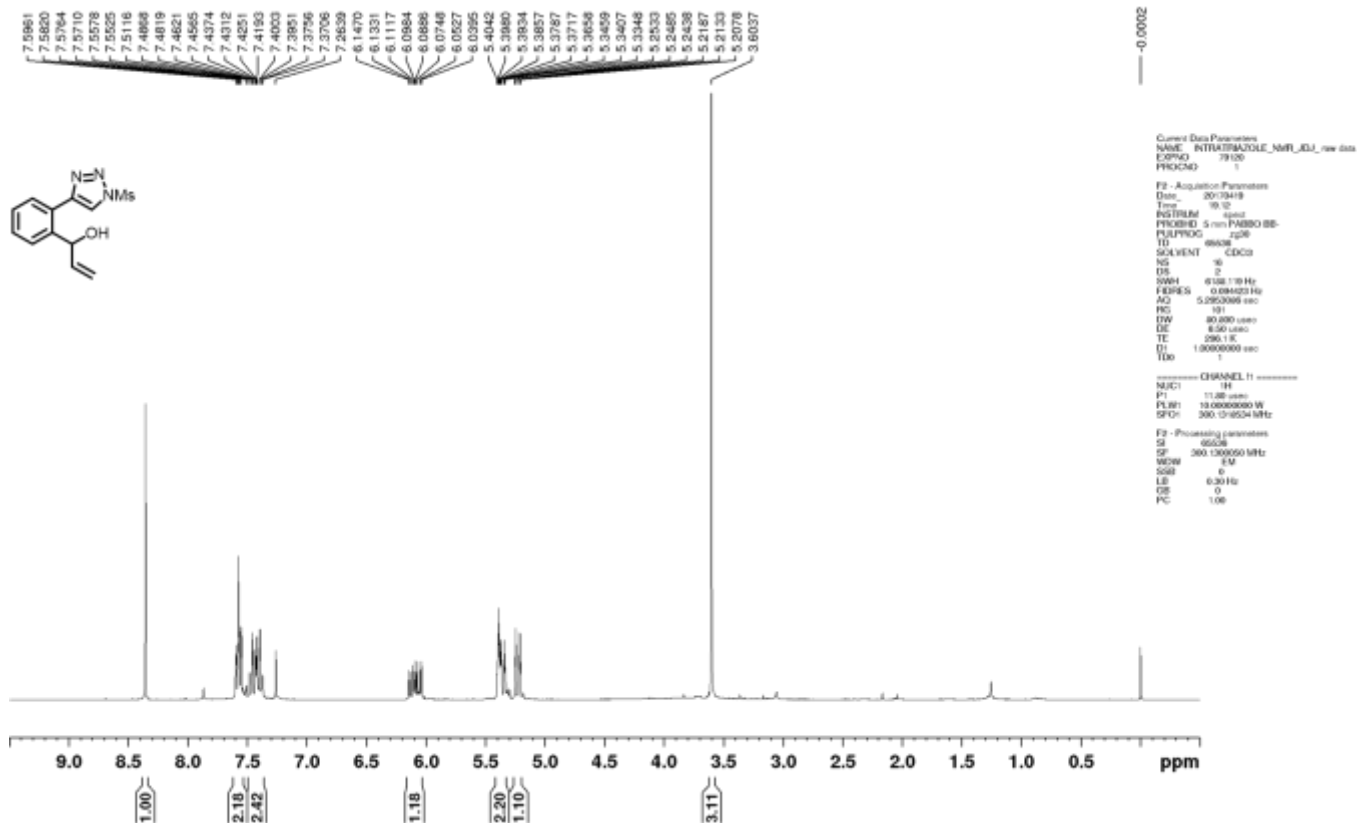

<sup>13</sup>C spectra of compound **1k**

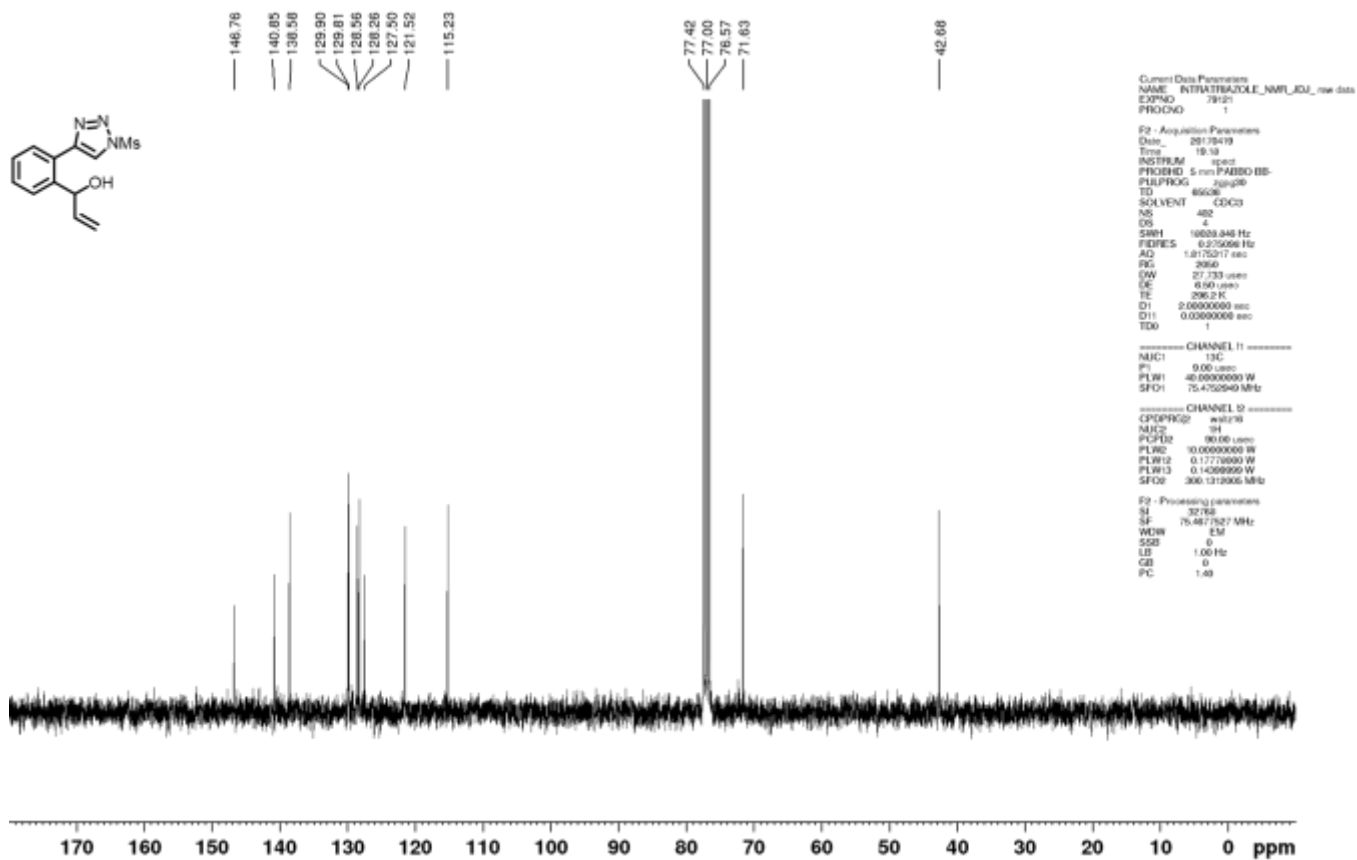

<sup>1</sup>H spectra of compound 2a

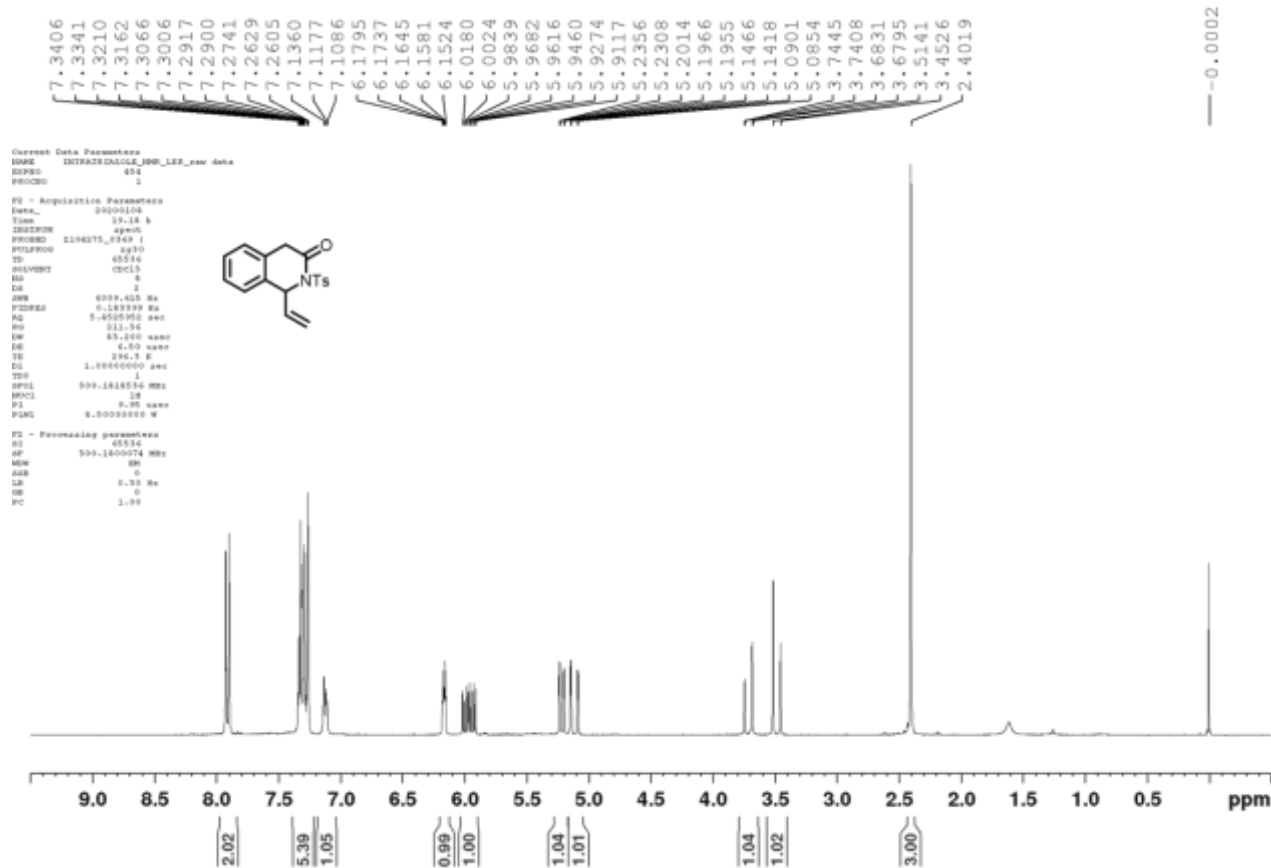

<sup>13</sup>C spectra of compound 2a

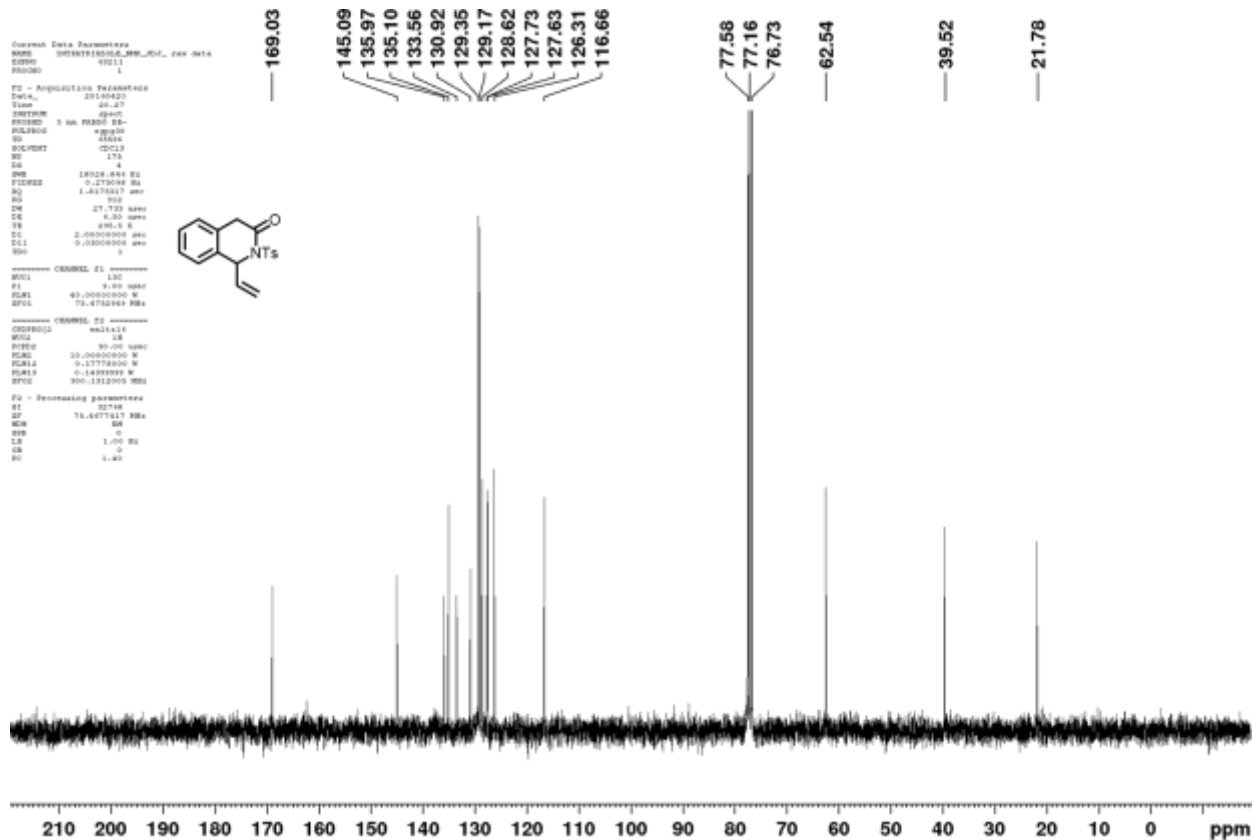



<sup>1</sup>H spectra of compound 2b

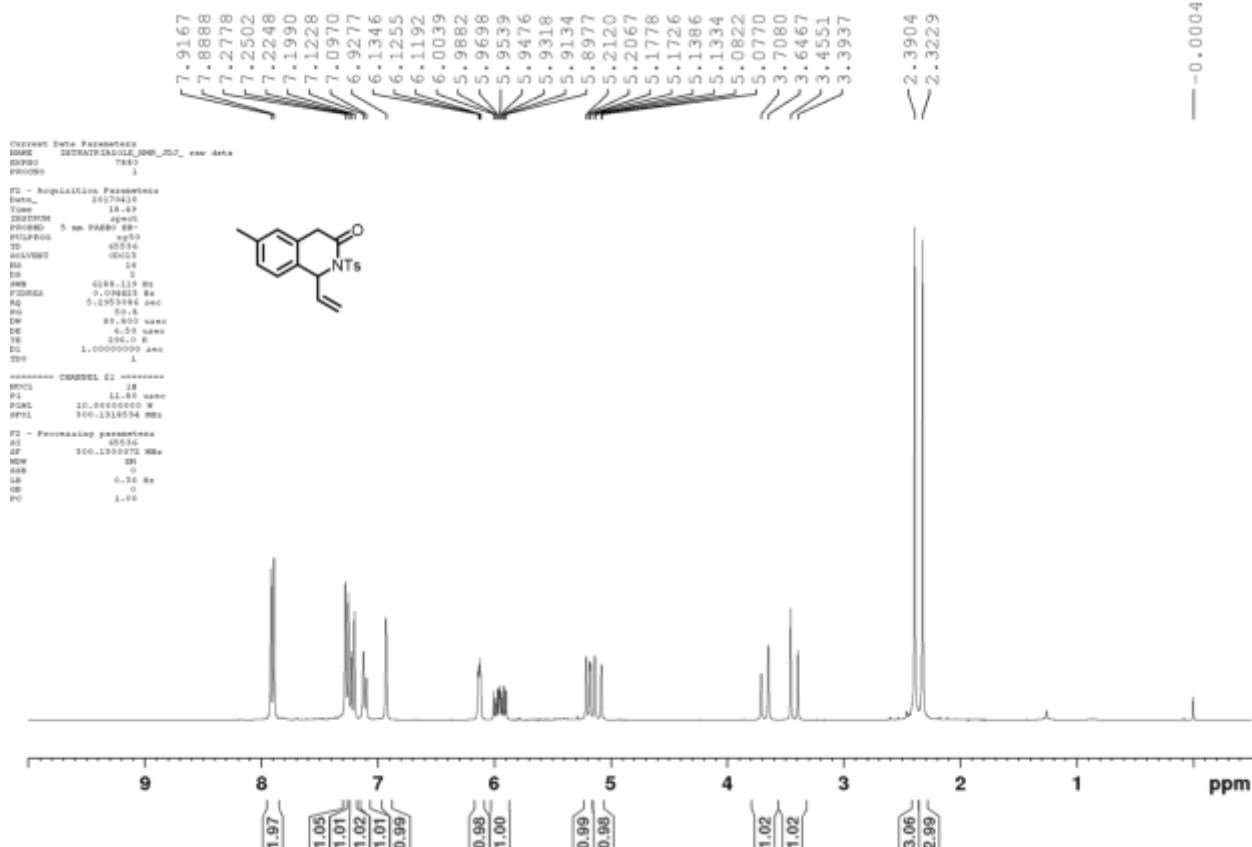

<sup>13</sup>C spectra of compound 2b

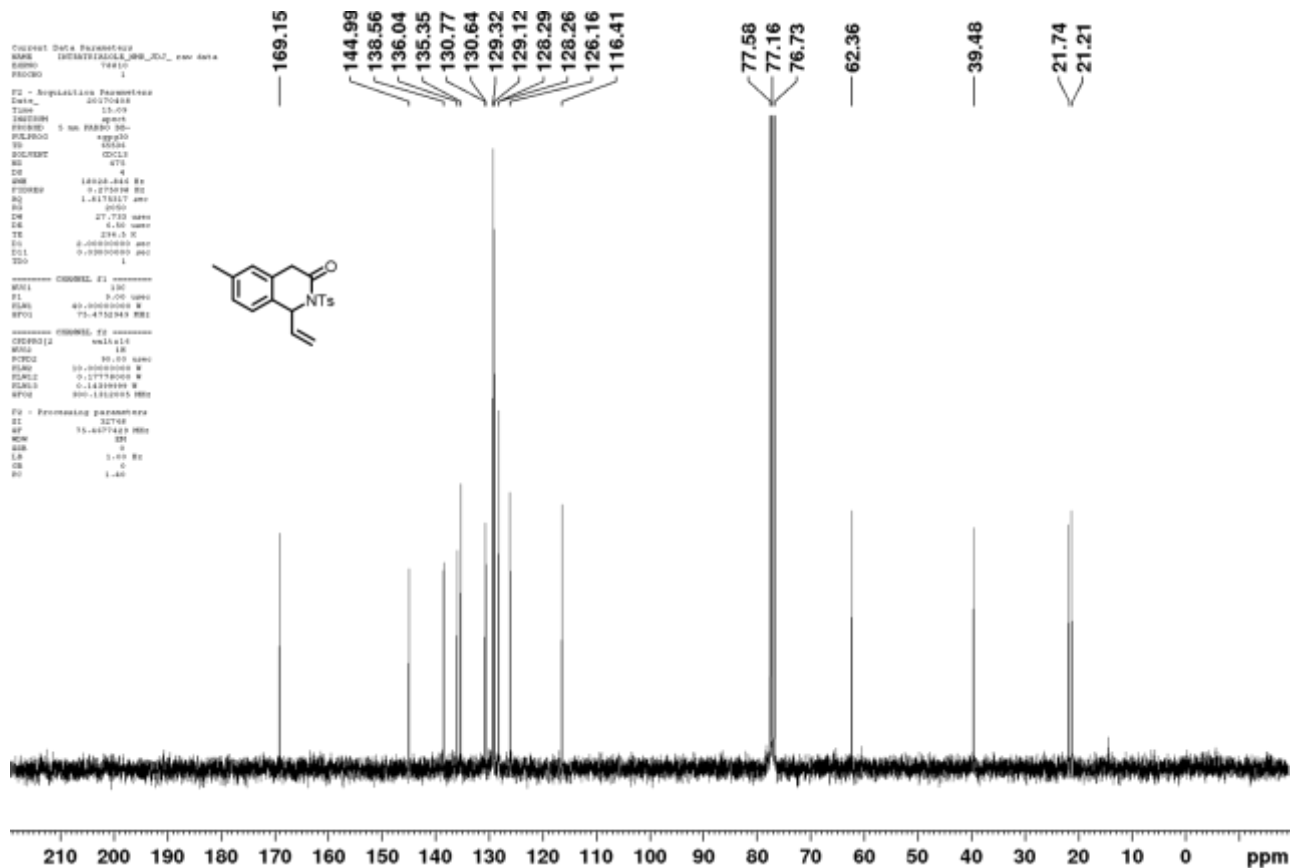

<sup>1</sup>H spectra of compound 2c

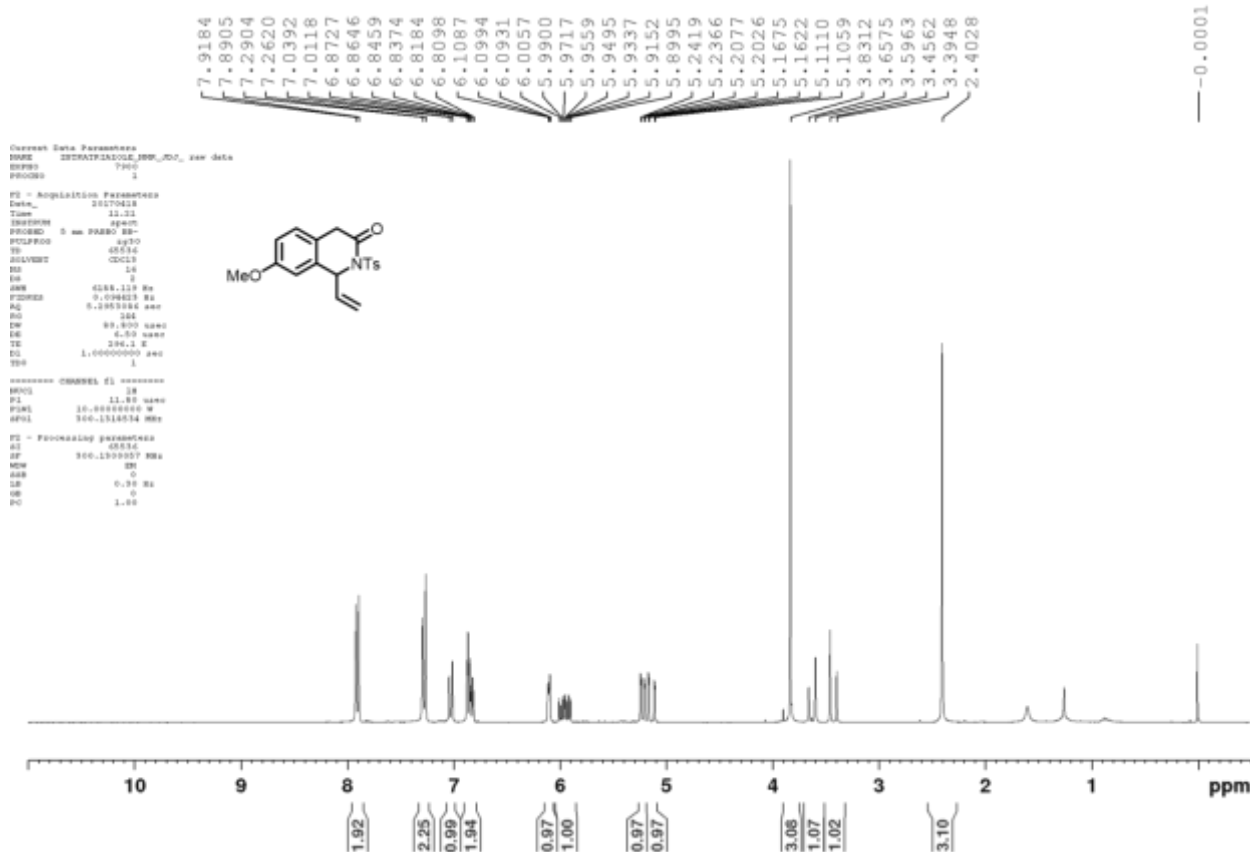

<sup>13</sup>C spectra of compound 2c

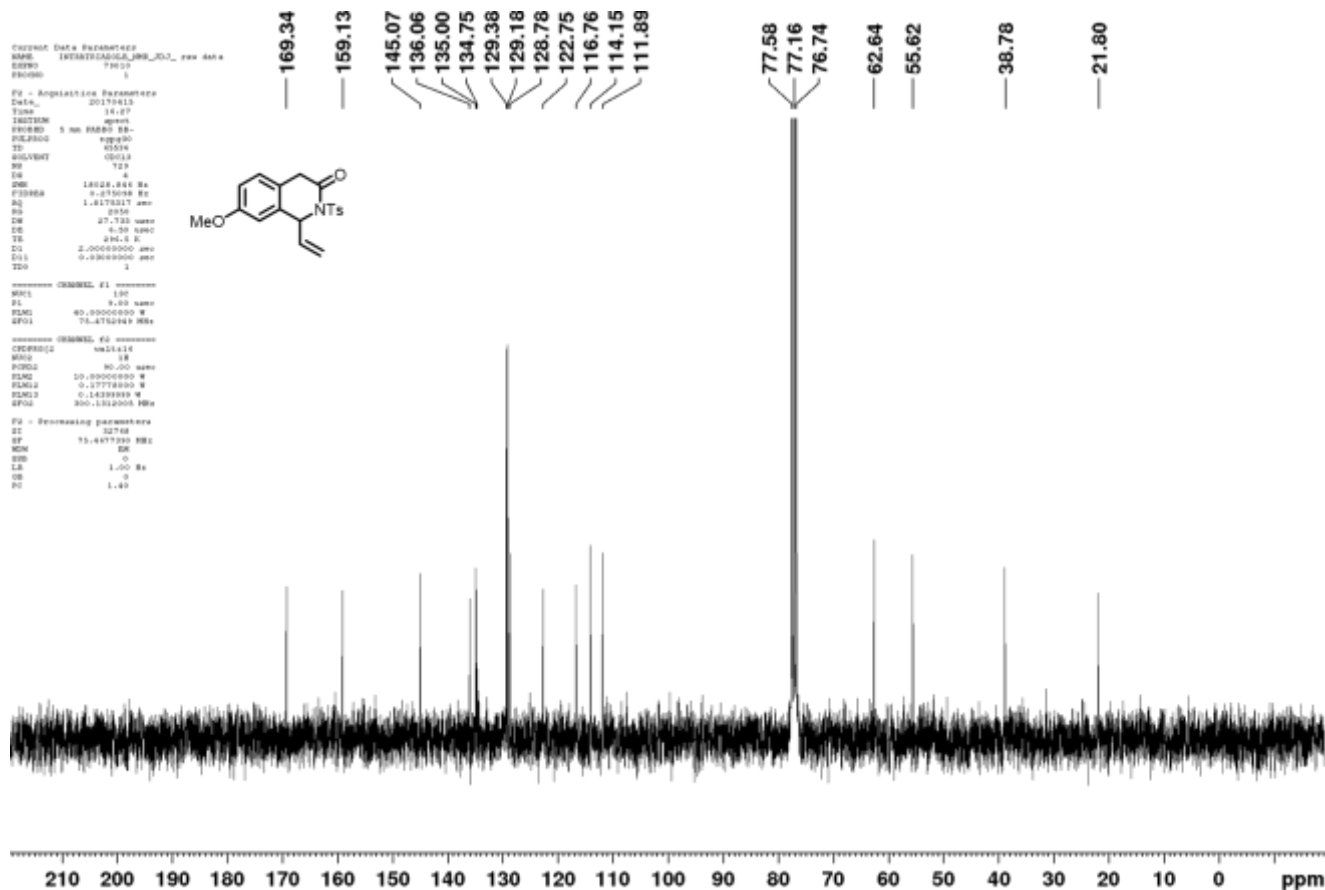

<sup>1</sup>H spectra of compound 2d

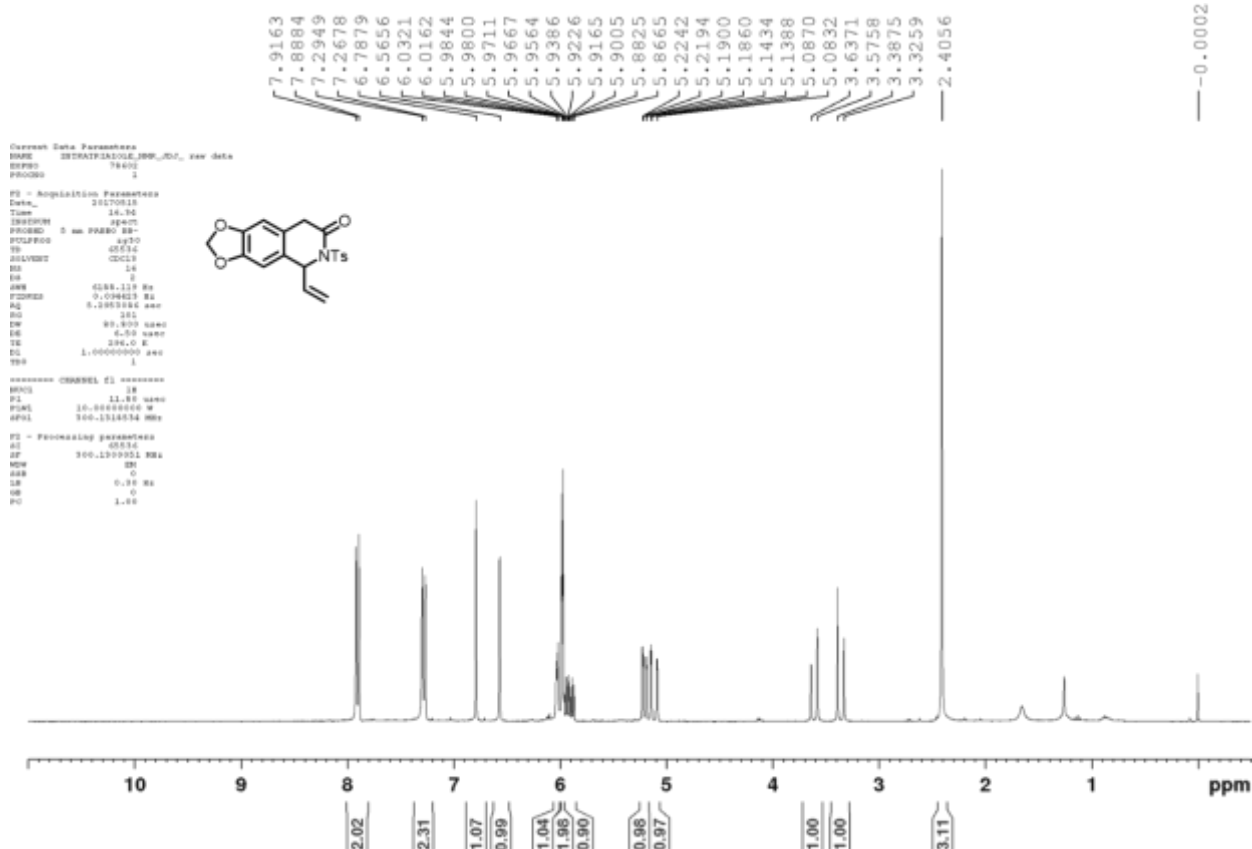

<sup>13</sup>C spectra of compound 2d

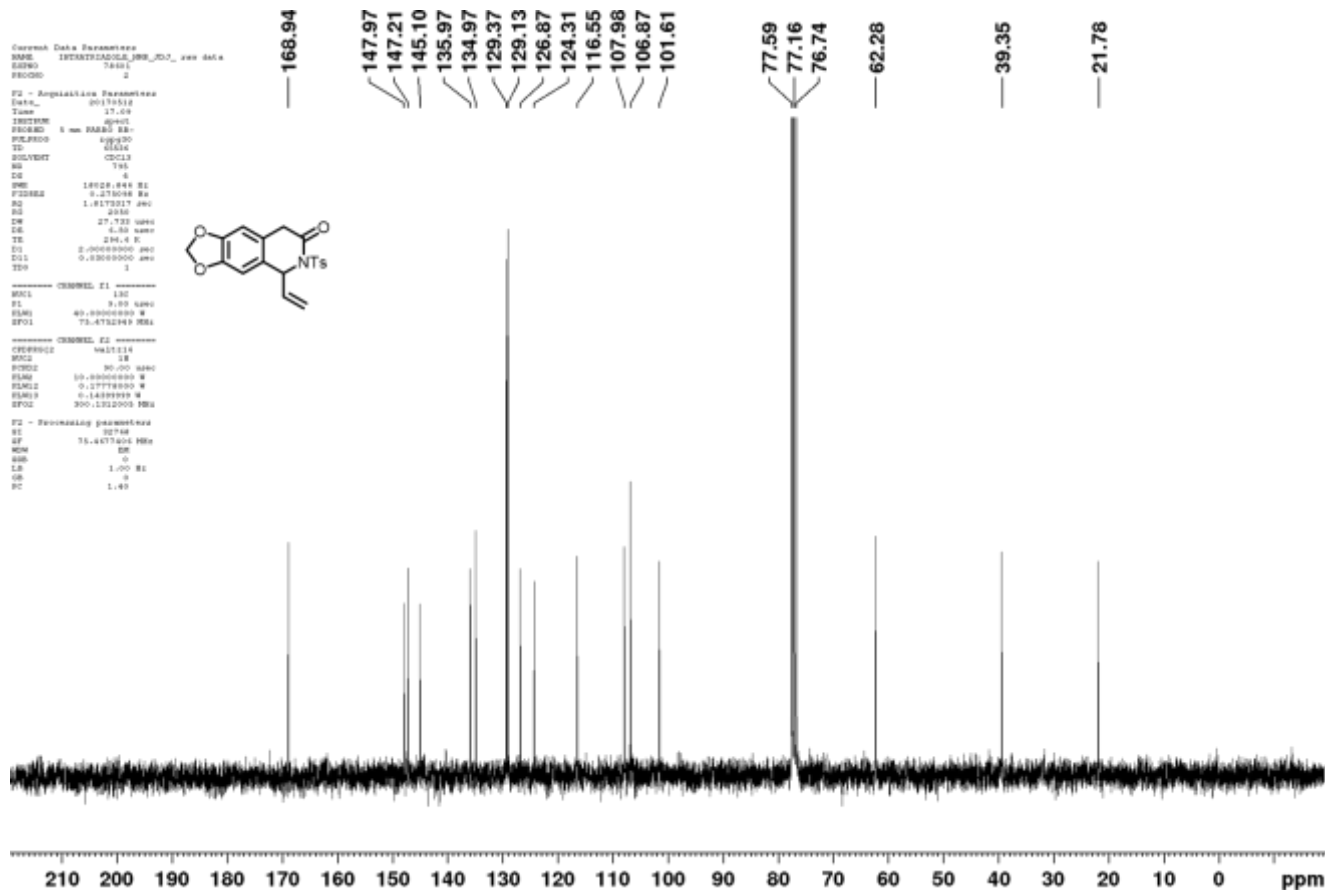

<sup>1</sup>H spectra of compound 2e

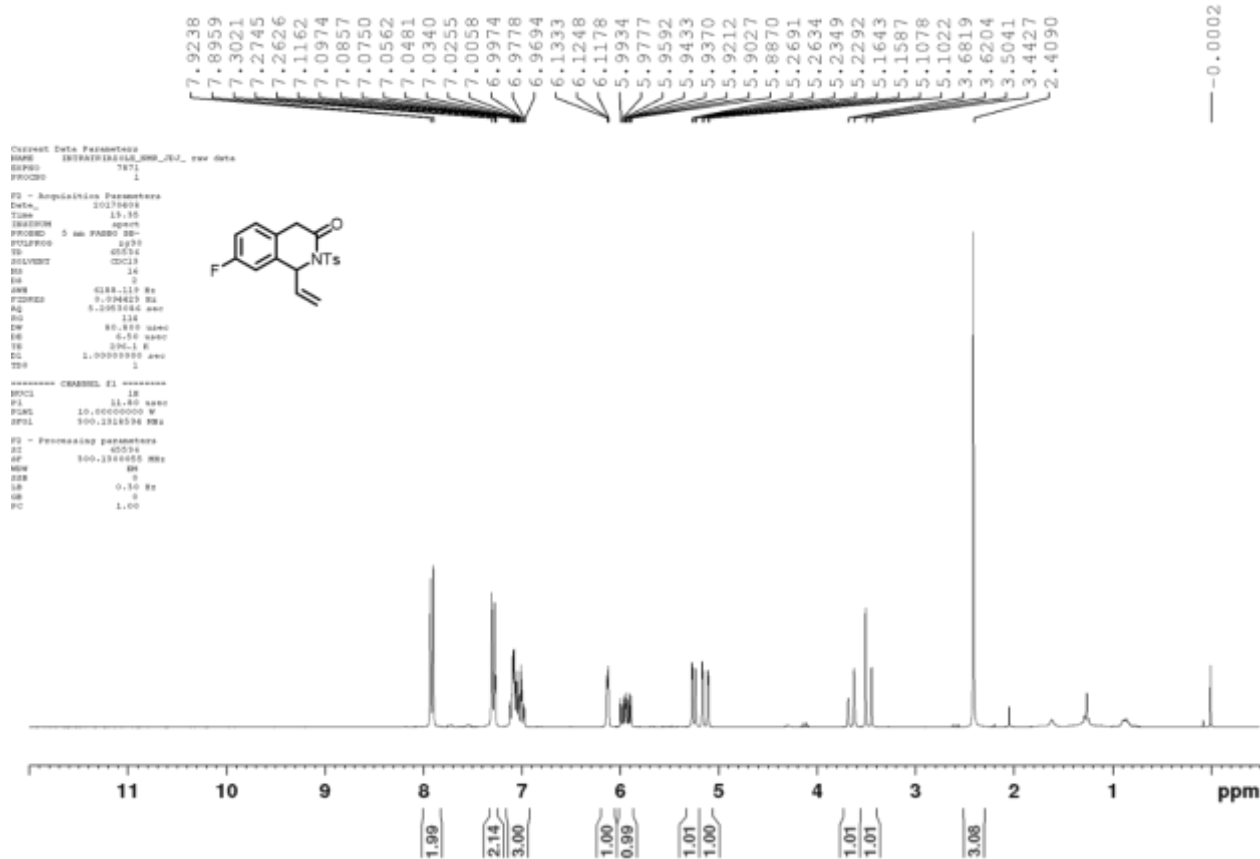

```

Current Data Parameters
NAME 18F01504516_001_001 raw data
EXPNO 1
PROCNO 1

F2 - Acquisition Parameters
Date_ 20170608
Time 19:55
INSTRUM spect
PROBHD 5 mm PABBO BBO
PULPROG zgpg30
TD 65536
SOLVENT CDCl3
NS 16
DS 4
SWH 6184.119 Hz
F2OFF2 0.04423 Hz
AQ 5.3953244 sec
RG 114
DW 80.413 usec
DE 6.50 nsec
TE 300.1 K
DQ 1.00000000 sec
TD0 1

===== CHANNEL f1 =====
NUC1 19
P1 11.80 usec
PL1 0.00000000 W
SFO1 300.1314534 MHz

F2 - Processing parameters
SI 32768
SF 300.1314534 MHz
WDW EM
SSB 0
LB 0.10 Hz
GB 0
PC 1.00
    
```

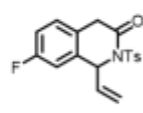

<sup>13</sup>C spectra of compound 2e

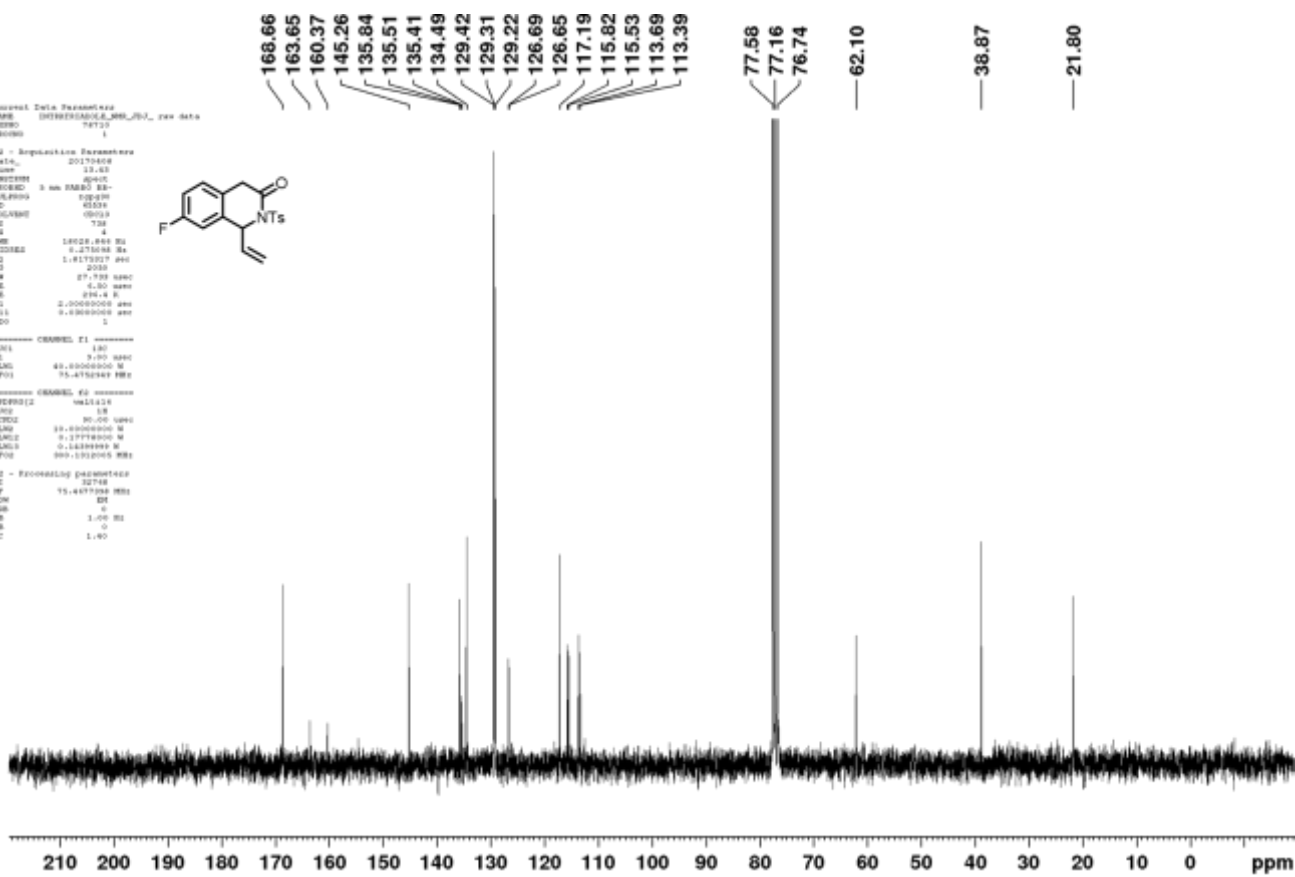

```

Current Data Parameters
NAME 18F01504516_001_001 raw data
EXPNO 1
PROCNO 1

F2 - Acquisition Parameters
Date_ 20170608
Time 20:43
INSTRUM spect
PROBHD 5 mm PABBO BBO
PULPROG zgpg30
TD 65536
SOLVENT CDCl3
NS 16
DS 4
SWH 18028.880 Hz
F2OFF2 0.271048 Hz
AQ 1.8173027 sec
RG 2000
DW 87.793 usec
DE 6.50 nsec
TE 300.1 K
DQ 1.00000000 sec
TD0 1

===== CHANNEL f1 =====
NUC1 13
P1 9.00 usec
PL1 0.00000000 W
SFO1 125.762947 MHz

===== CHANNEL f2 =====
CPDPRG2 waltz16
NUC2 15
P2OFF2 30.00 usec
PL2 0.00000000 W
PL2OFF2 0.37778000 W
SFO2 90.0252005 MHz

F2 - Processing parameters
SI 32768
SF 125.762947 MHz
WDW EM
SSB 0
LB 1.00 Hz
GB 0
PC 1.00
    
```

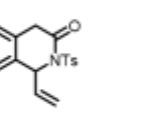

<sup>19</sup>F spectra of compound 2e

Current Data Parameters  
NAME LRF B  
EXPHO 956  
PROCNO 1

F2 - Acquisition Parameters  
Date\_ 20210428  
Time\_ 19.41 h  
INSTRUM spect  
PROBHD 2104275\_0369 (   
PULPROG zg30  
TD 131072  
SOLVENT cdc13  
MS 16  
DS 4  
SWH 66964.289 Hz  
FIDRES 1.021794 Hz  
AQ 0.9786710 sec  
RG 211.36  
DW 7.467 usec  
DE 6.50 usec  
TE 295.4 K  
D1 1.0000000 sec  
TD0 1  
SFOL 282.4231571 MHz  
NUCL 19F  
P1 15.00 usec  
PLM1 8.60000038 W

F2 - Processing parameters  
SI 65536  
SF 282.4314022 MHz  
WDW EM  
SSB 0  
LB 0.30 Hz  
GB 0  
PC 1.00

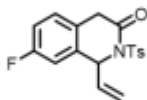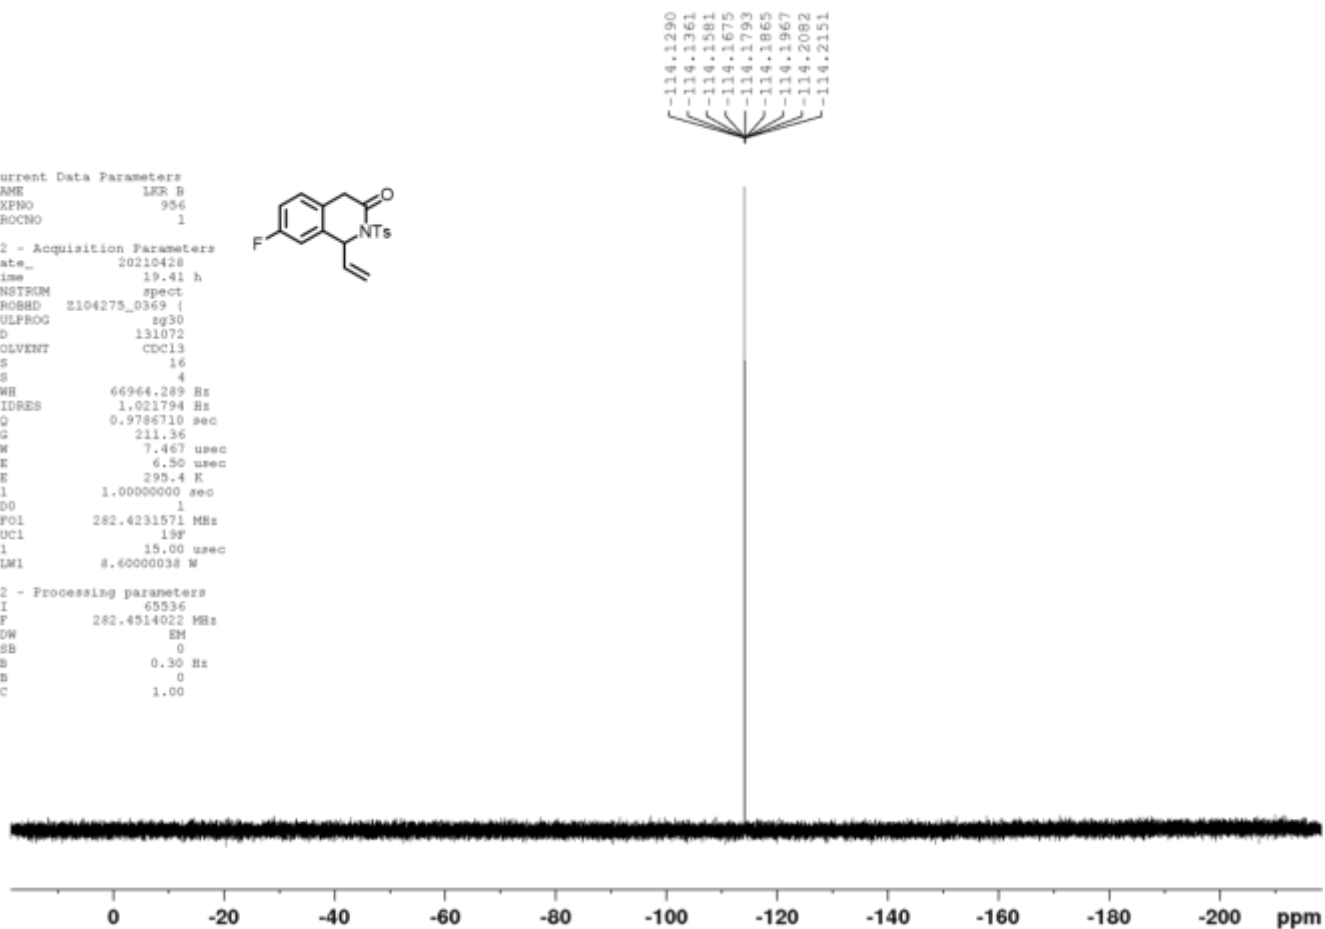

<sup>1</sup>H spectra of compound **2f**

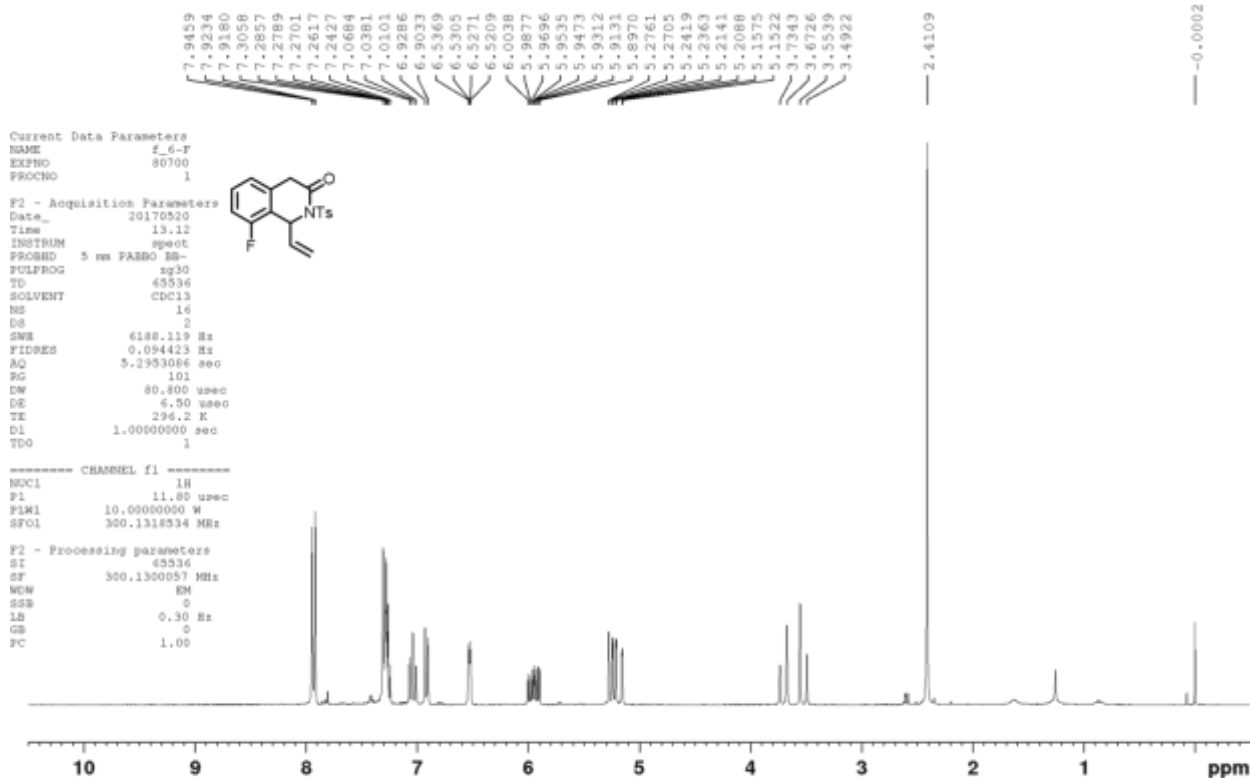

<sup>13</sup>C spectra of compound **2f**

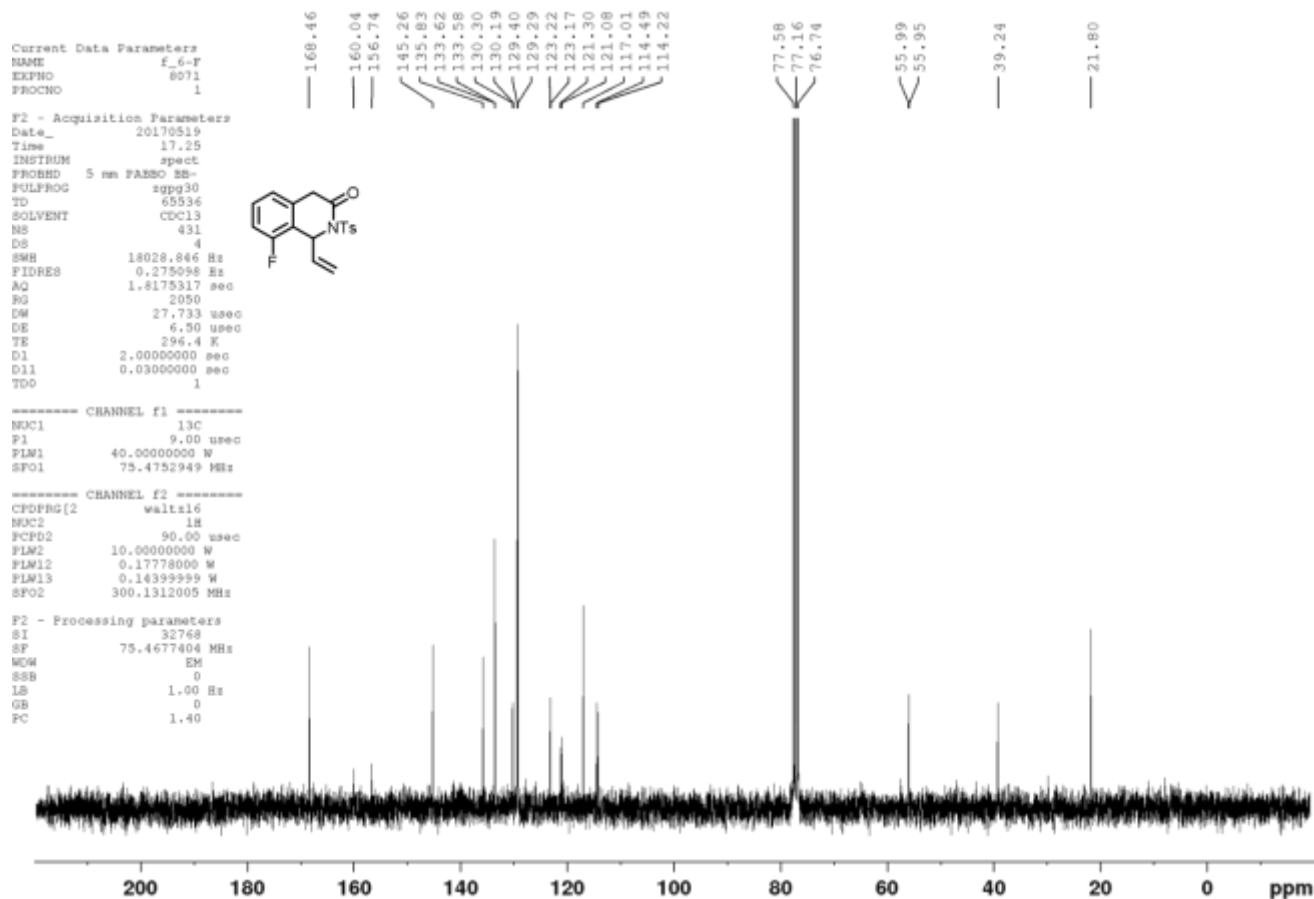

<sup>19</sup>F spectra of compound **2f**

Current Data Parameters  
NAME LRR B  
EXPNO 992  
PROCNO 1

F2 - Acquisition Parameters  
Date\_ 20210505  
Time 23.06 h  
INSTRUM spect  
PROBHD Z104275\_0369 (4  
PULPROG zg30  
TD 131072  
SOLVENT CDCl3  
NS 16  
DS 4  
SMB 64964.289 Hz  
FIDRES 1.021794 Hz  
AQ 0.9786710 sec  
RG 211.36  
DM 7.467 usec  
DE 6.50 usec  
TE 295.6 K  
D1 1.0000000 sec  
TDD 1  
SFO1 282.4231571 MHz  
NUC1 19F  
P1 15.00 usec  
P1M1 8.60000038 W

F2 - Processing parameters  
SI 65536  
SF 282.4514022 MHz  
WDW EM  
SSB 0  
LB 0.30 Hz  
GB 0  
PC 1.00

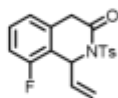

-119.6851  
-119.7042  
-119.7170  
-119.7363

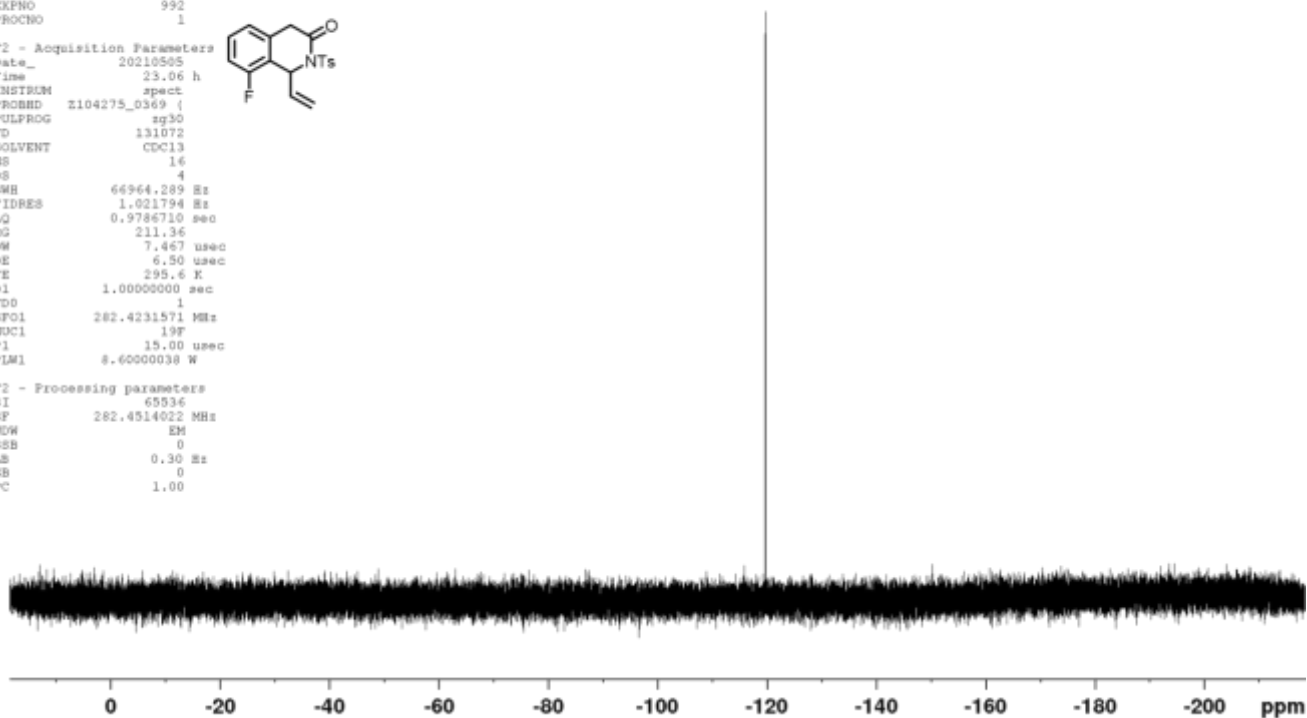

<sup>1</sup>H spectra of compound 2g

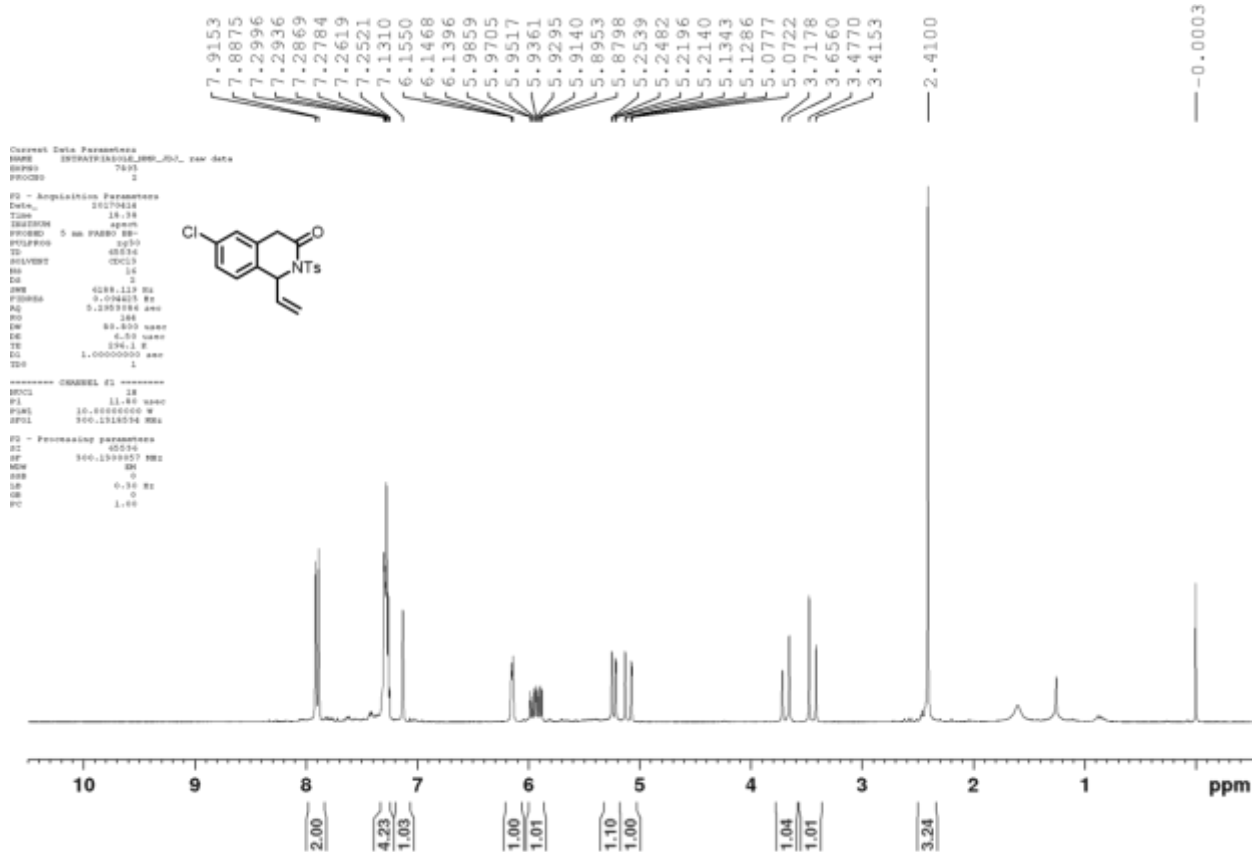

<sup>13</sup>C spectra of compound 2g

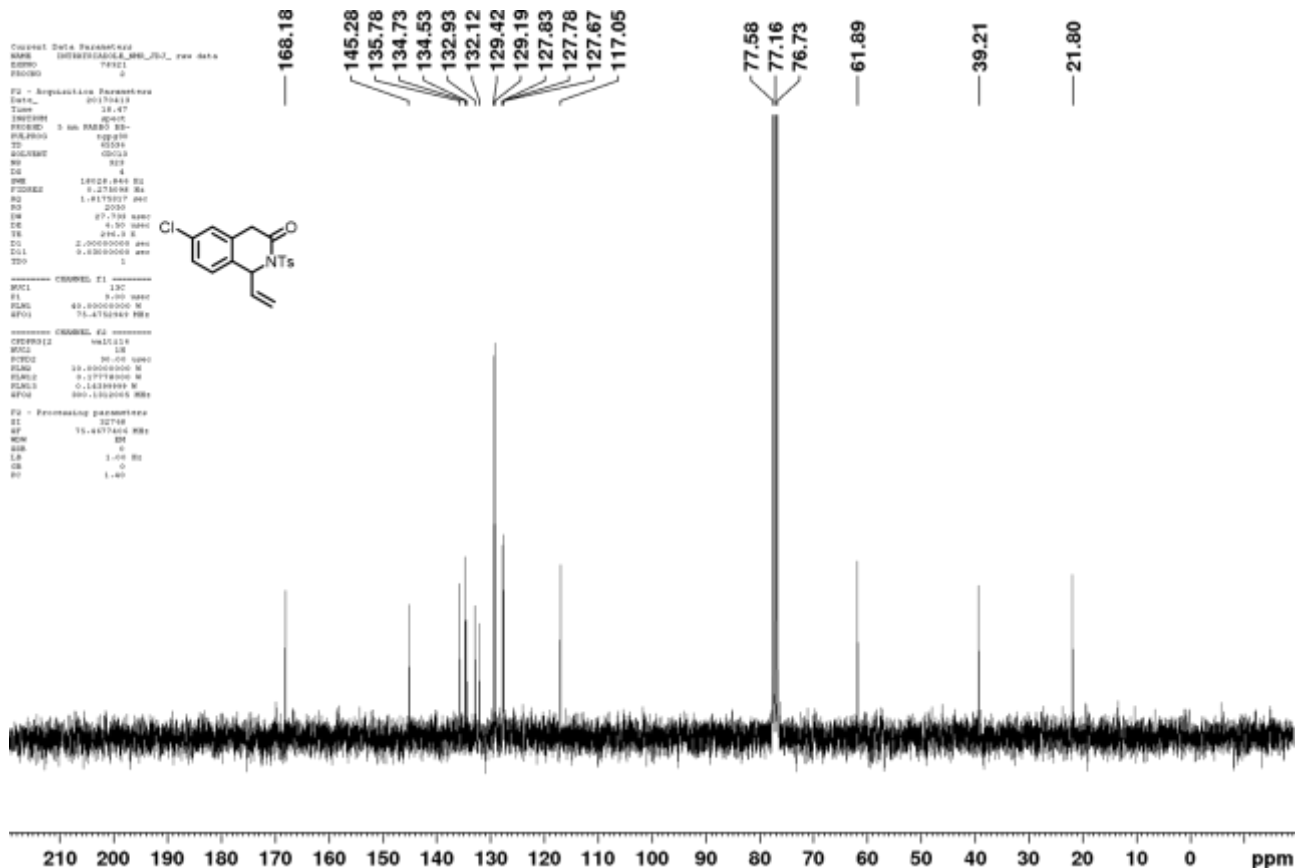





<sup>1</sup>H spectra of compound 2j

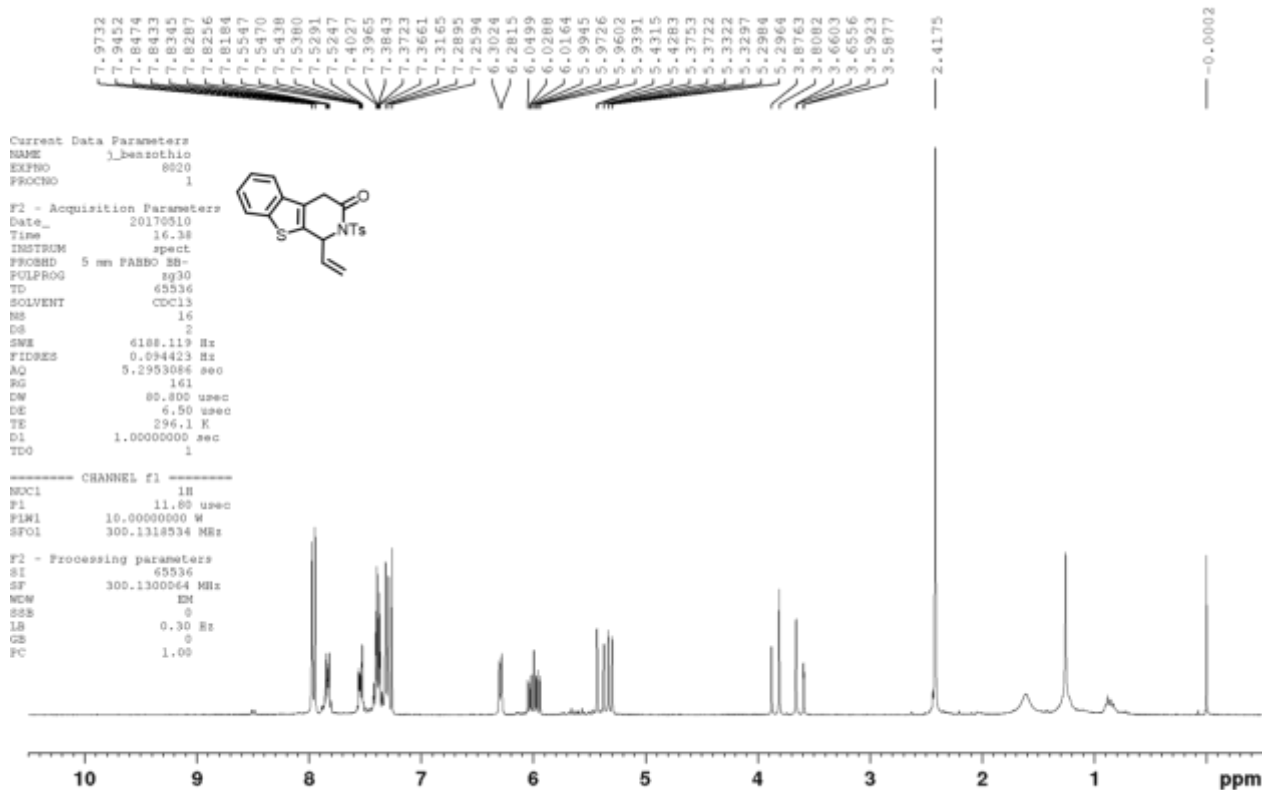

<sup>13</sup>C spectra of compound 2j

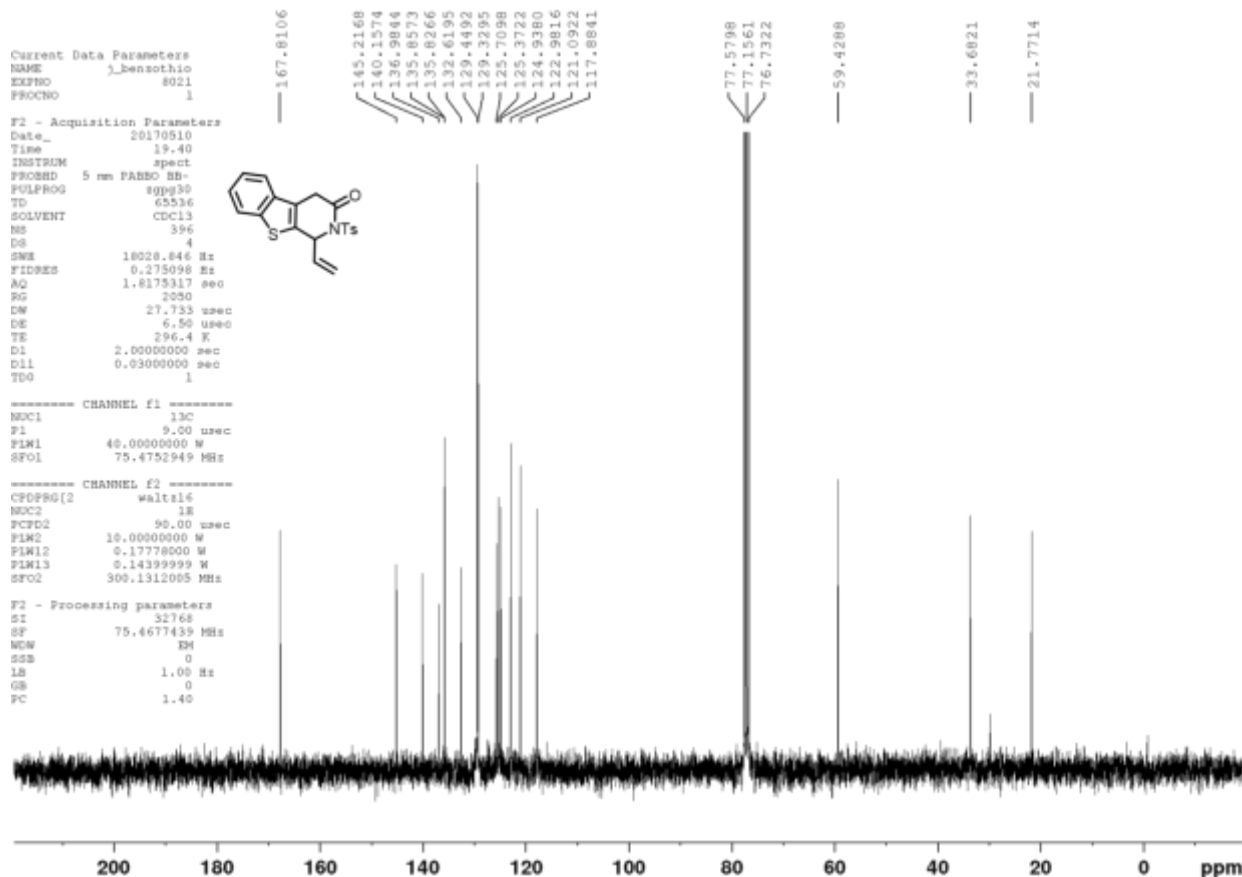

$^1\text{H}$  spectra of compound 2k

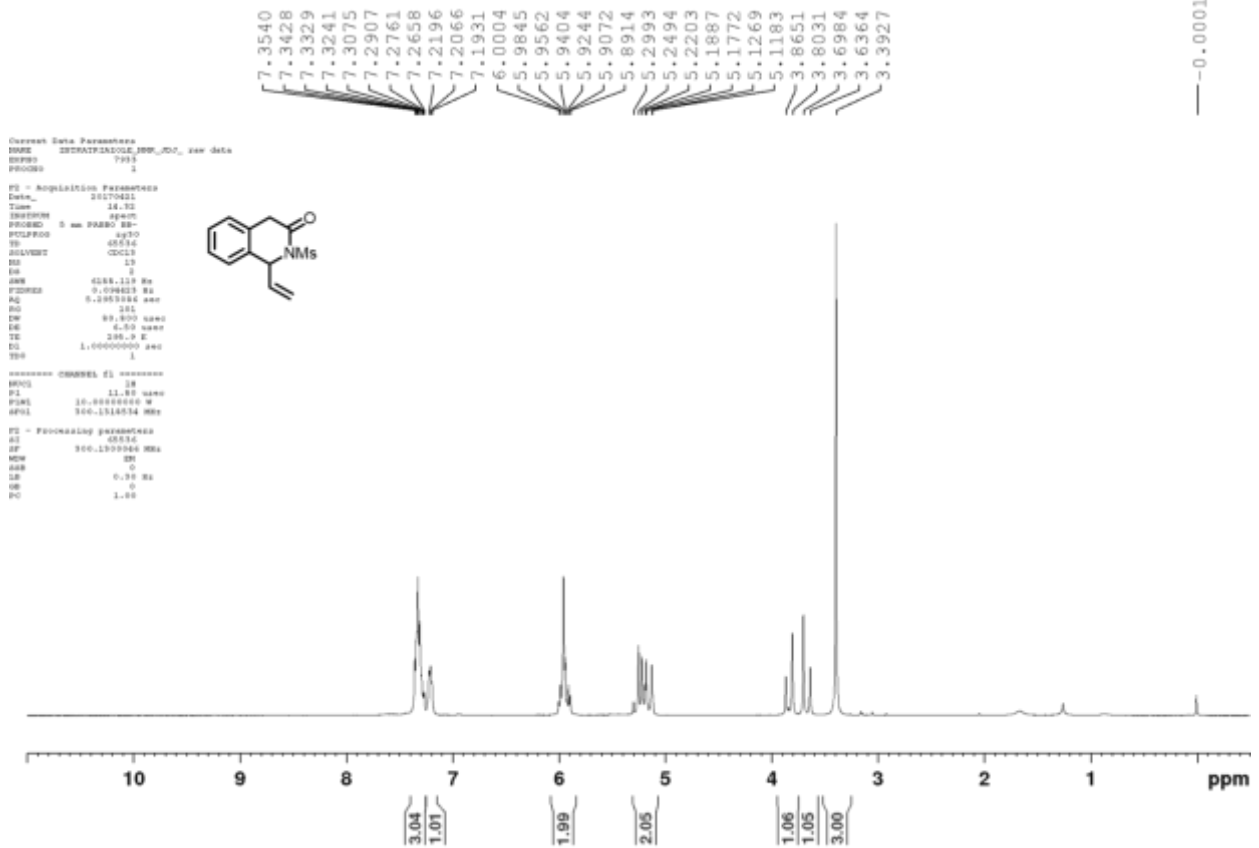

$^{13}\text{C}$  spectra of compound 2k

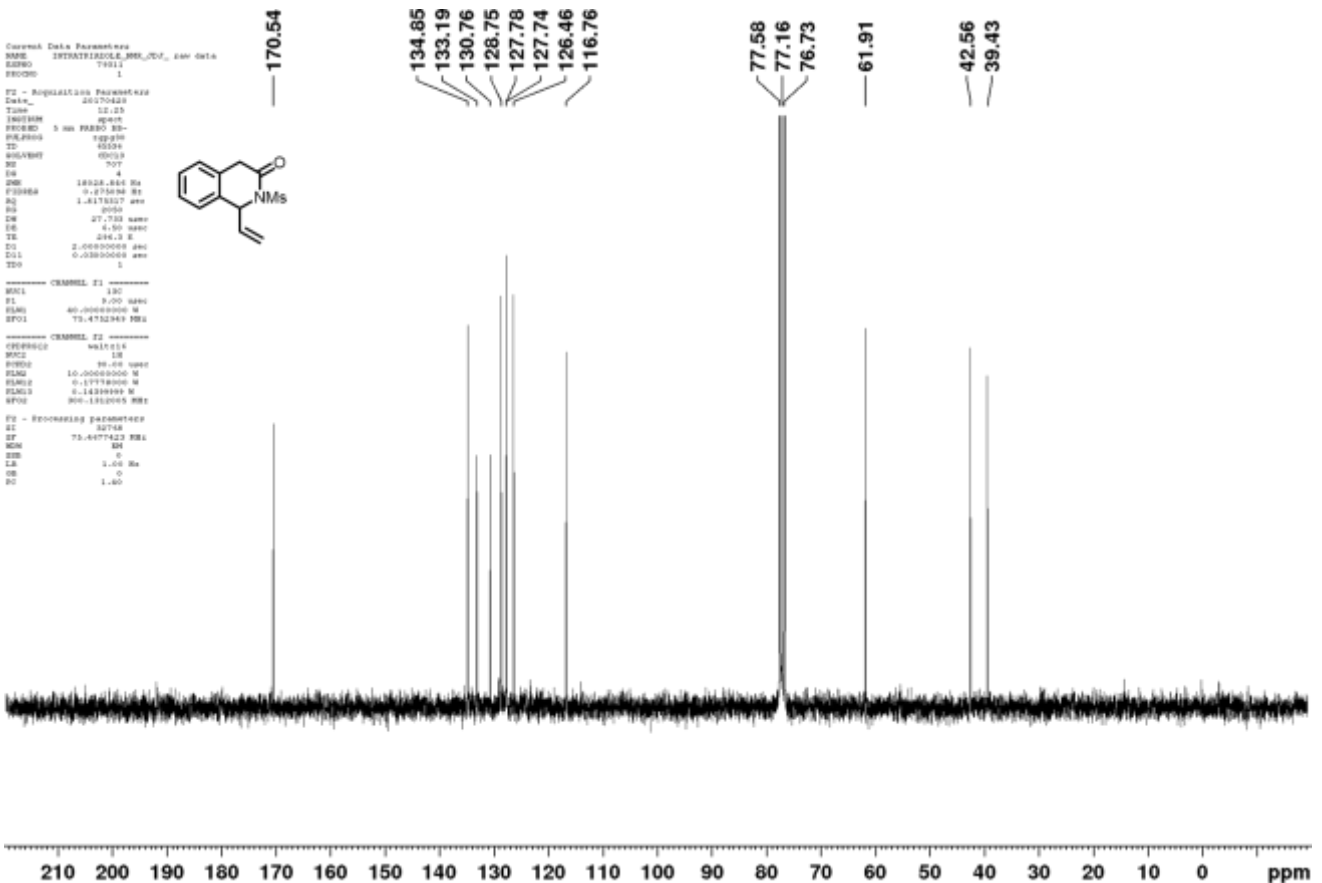

<sup>1</sup>H spectra of compound **3a** (crude)

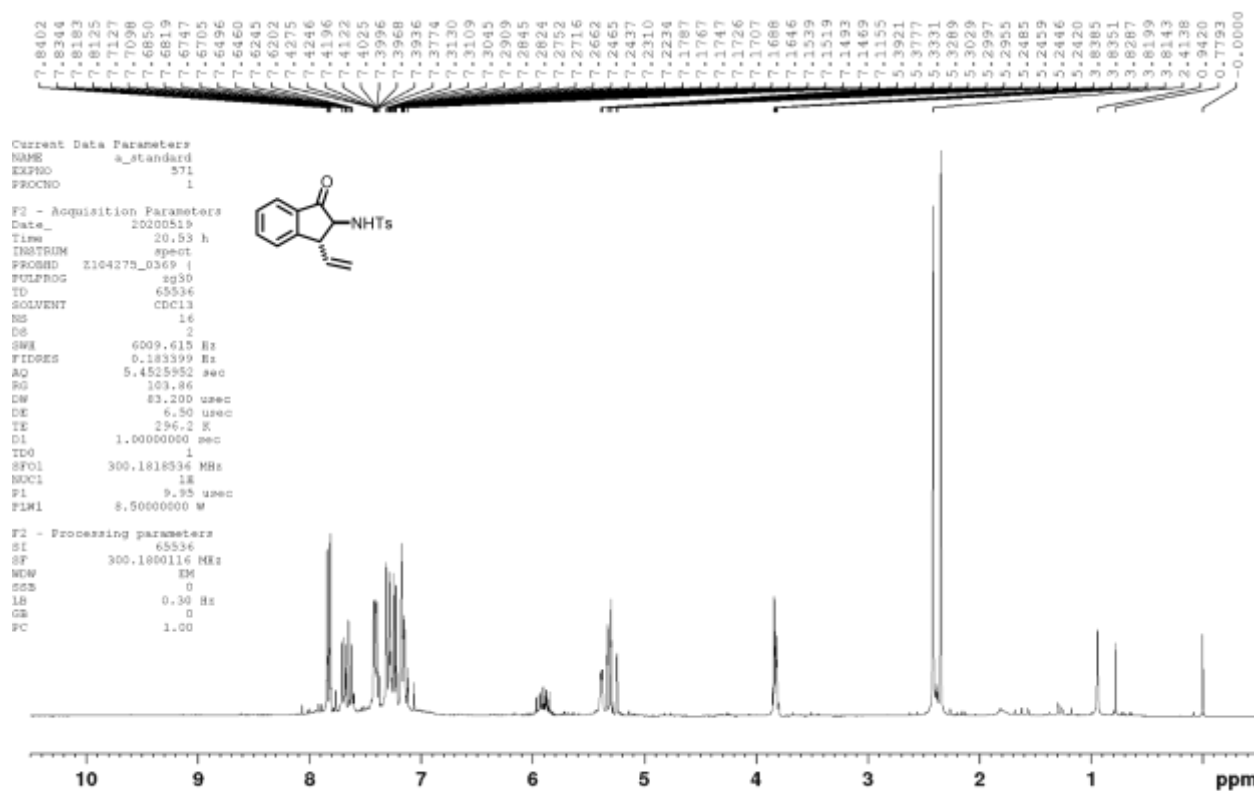

<sup>1</sup>H spectra of compound **3a** (*cis/trans* mixture after column chromatography)

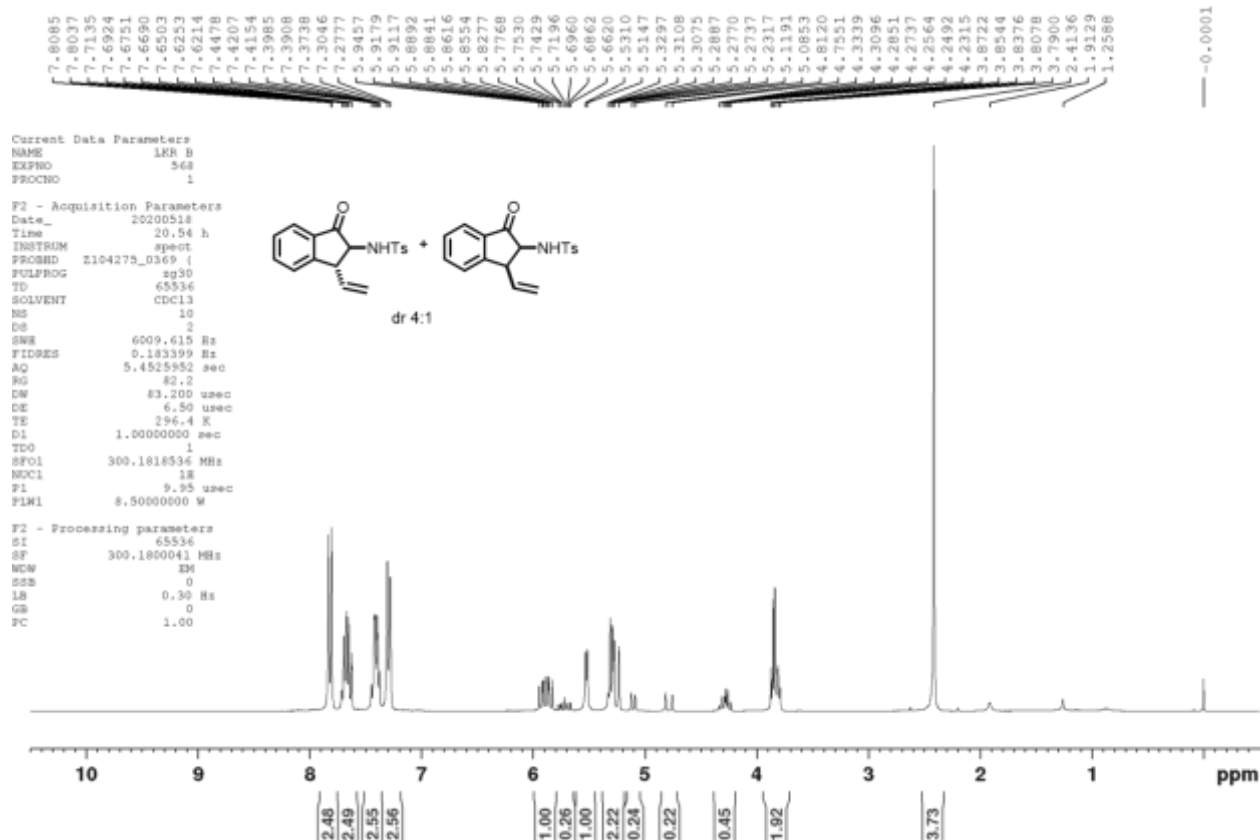

<sup>1</sup>H spectra of compound **3a** (*trans*)

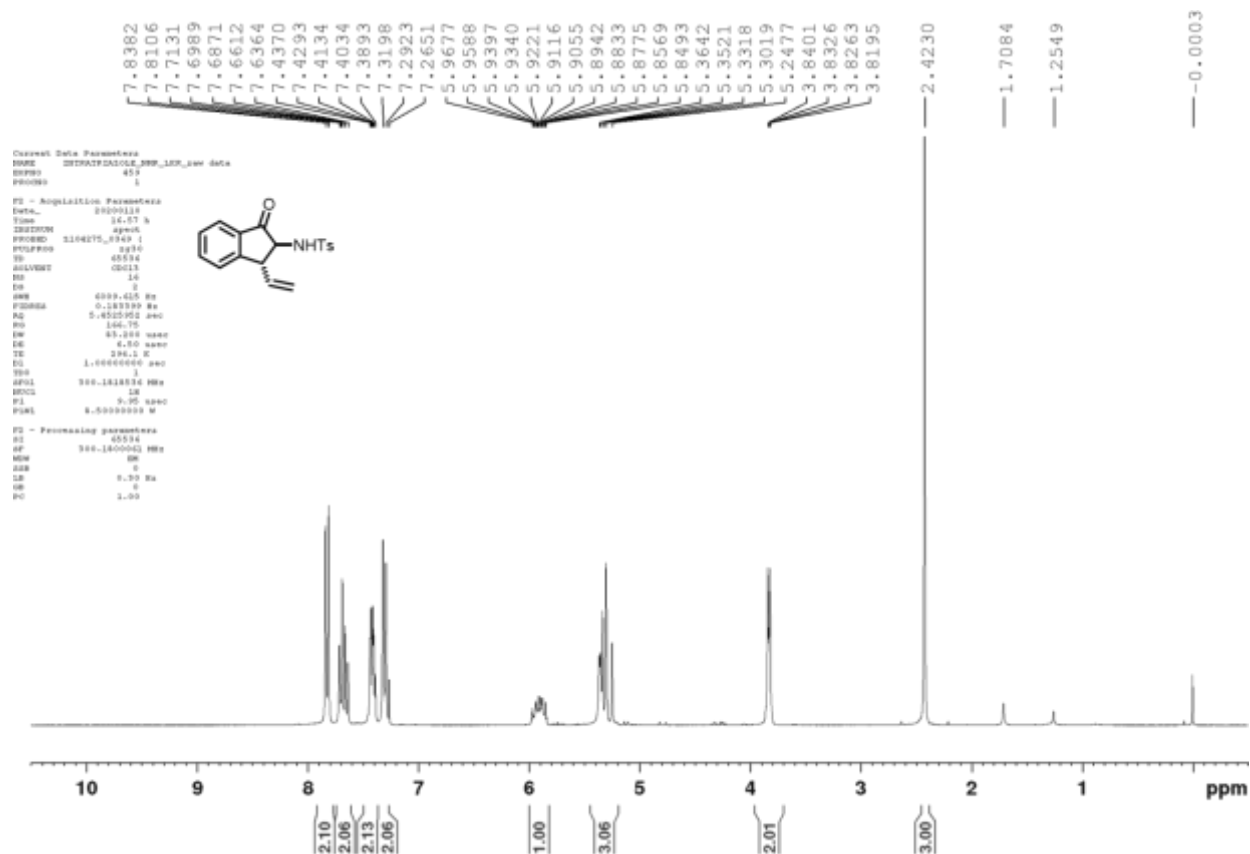

<sup>13</sup>C spectra of compound **3a** (*trans*)

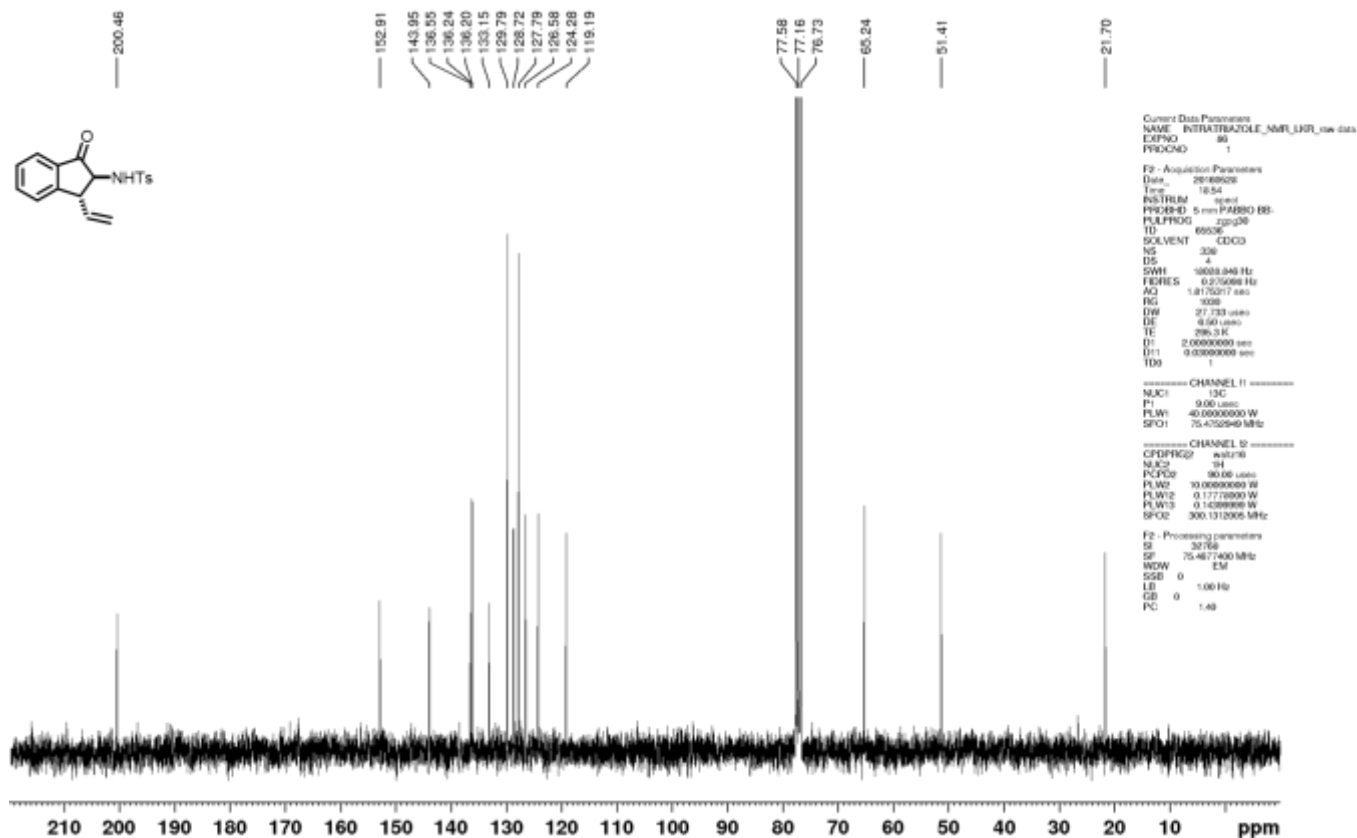

<sup>1</sup>H spectra of compound **3a'** (*cis*)

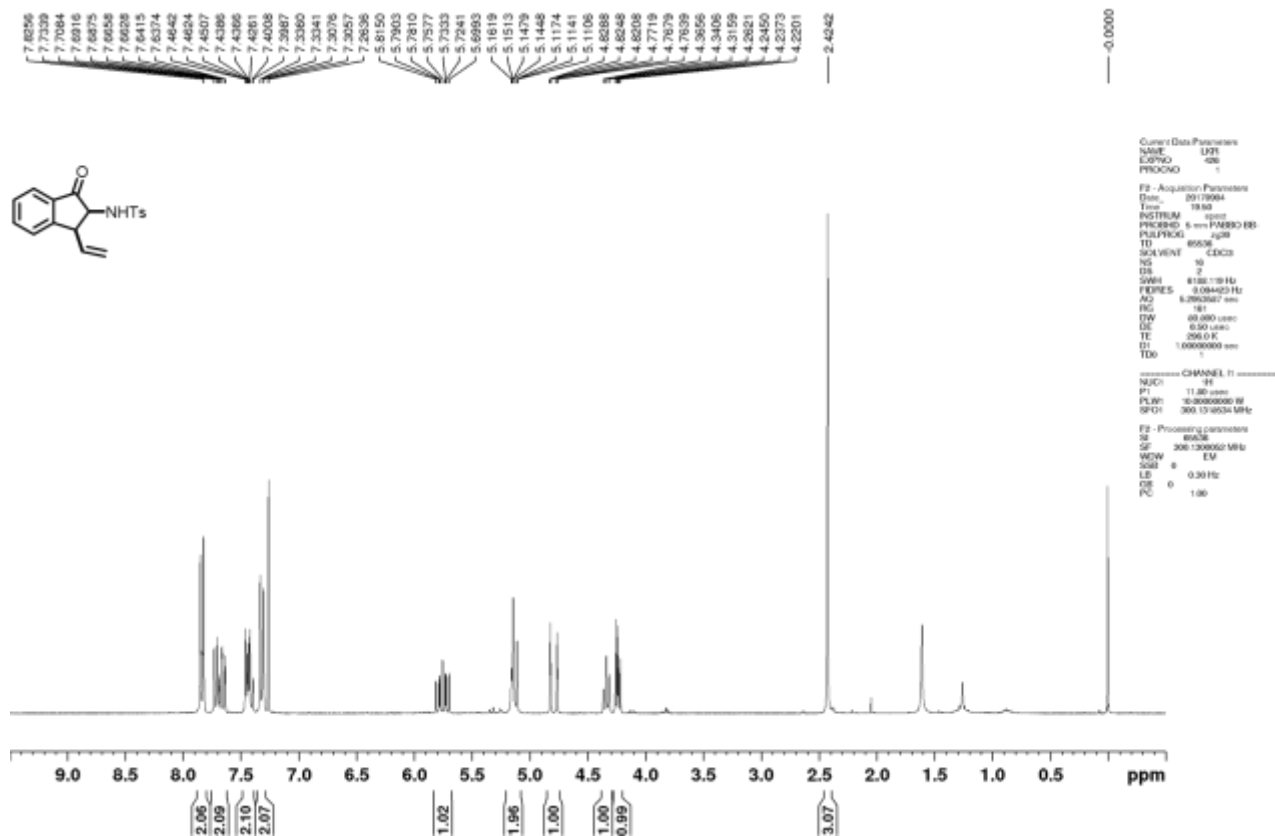

<sup>13</sup>C spectra of compound **3a'** (*cis*)

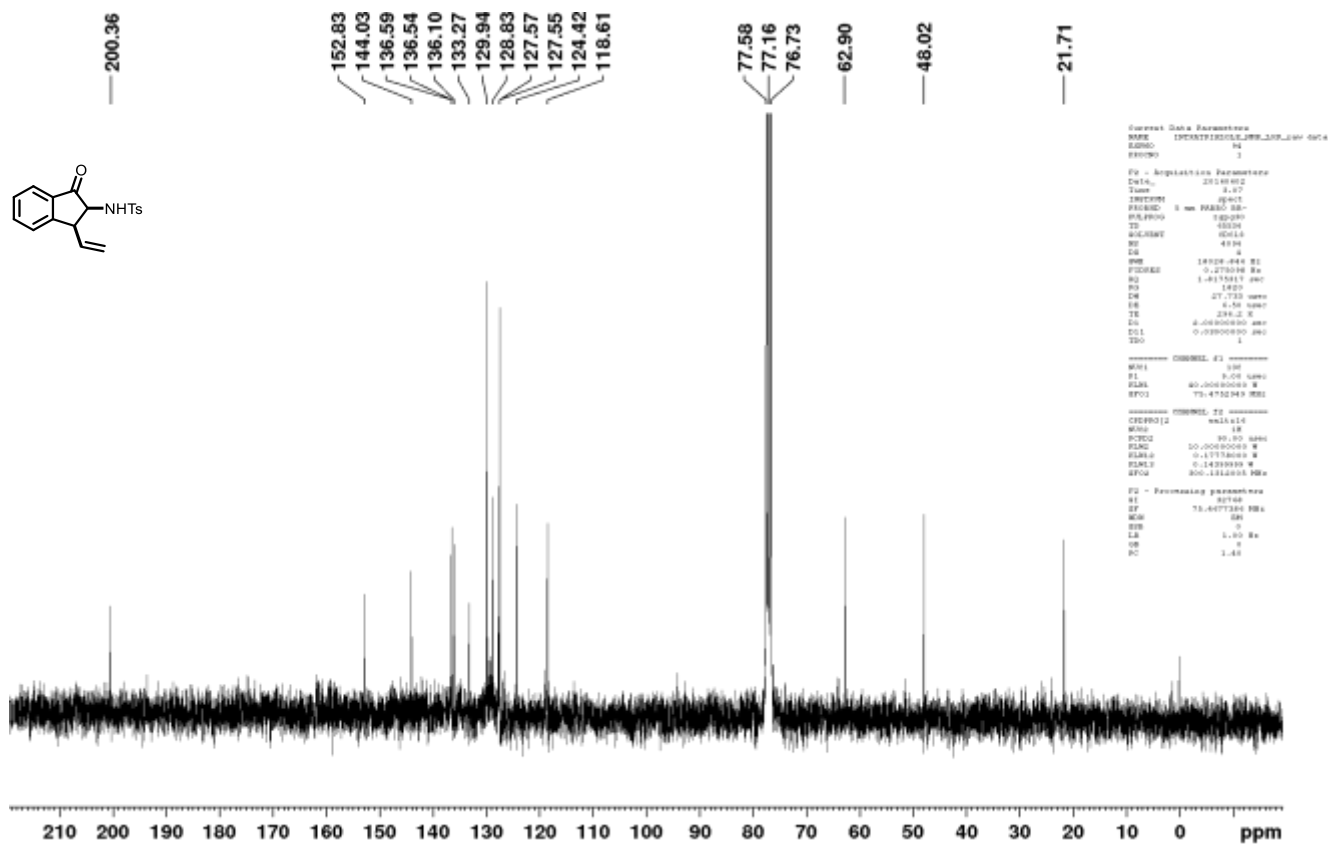

<sup>1</sup>H spectra of compound **3b** (crude)

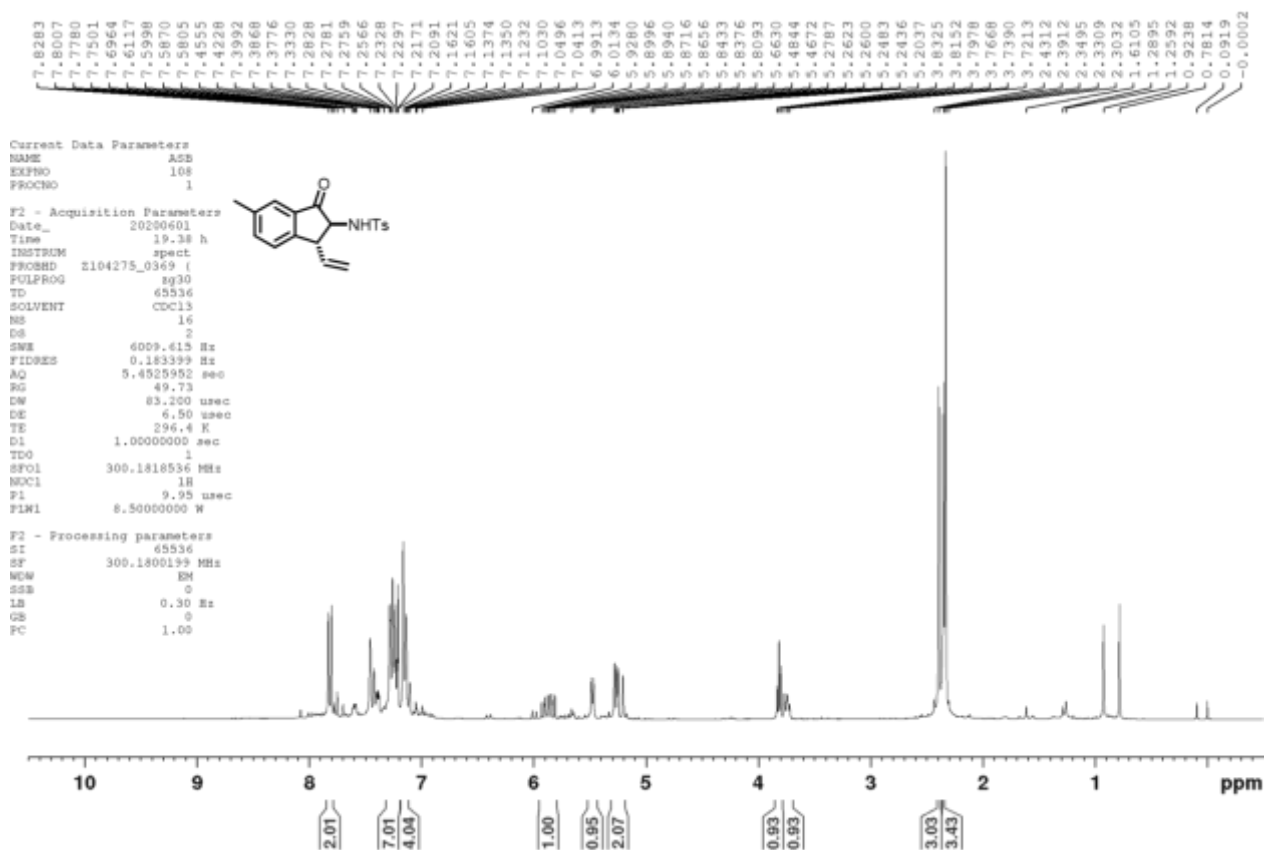

<sup>1</sup>H spectra of compound **3b** (*cis/trans* mixture after column chromatography)

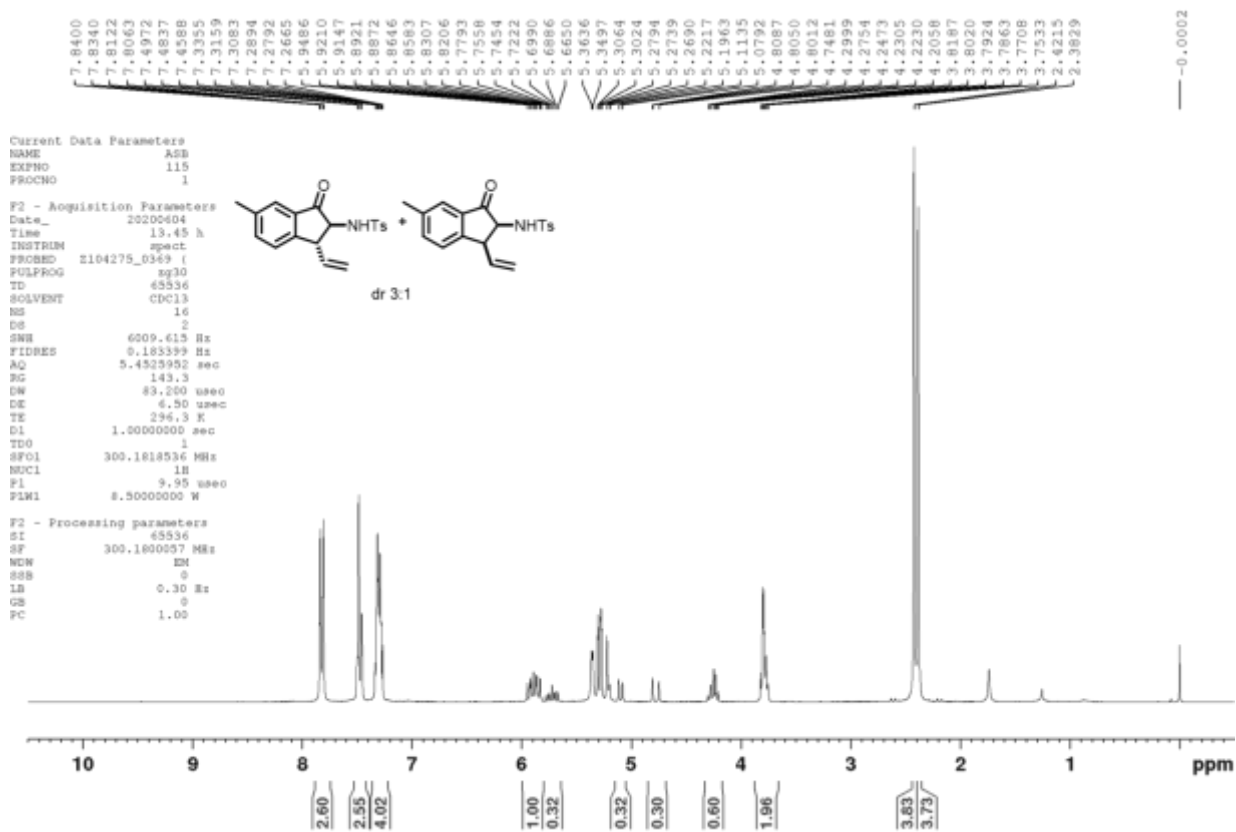

<sup>1</sup>H spectra of compound **3b** (*trans*)

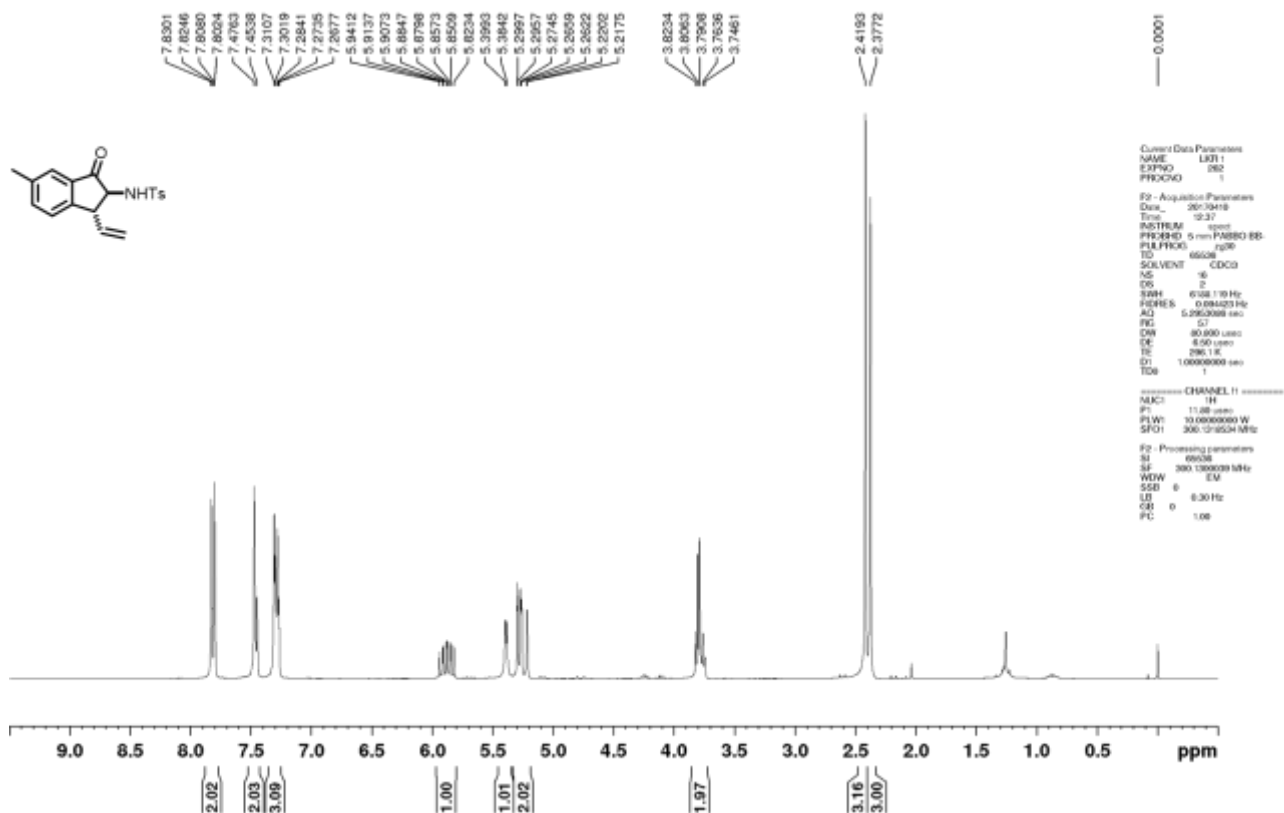

<sup>13</sup>C spectra of compound **3b** (*trans*)

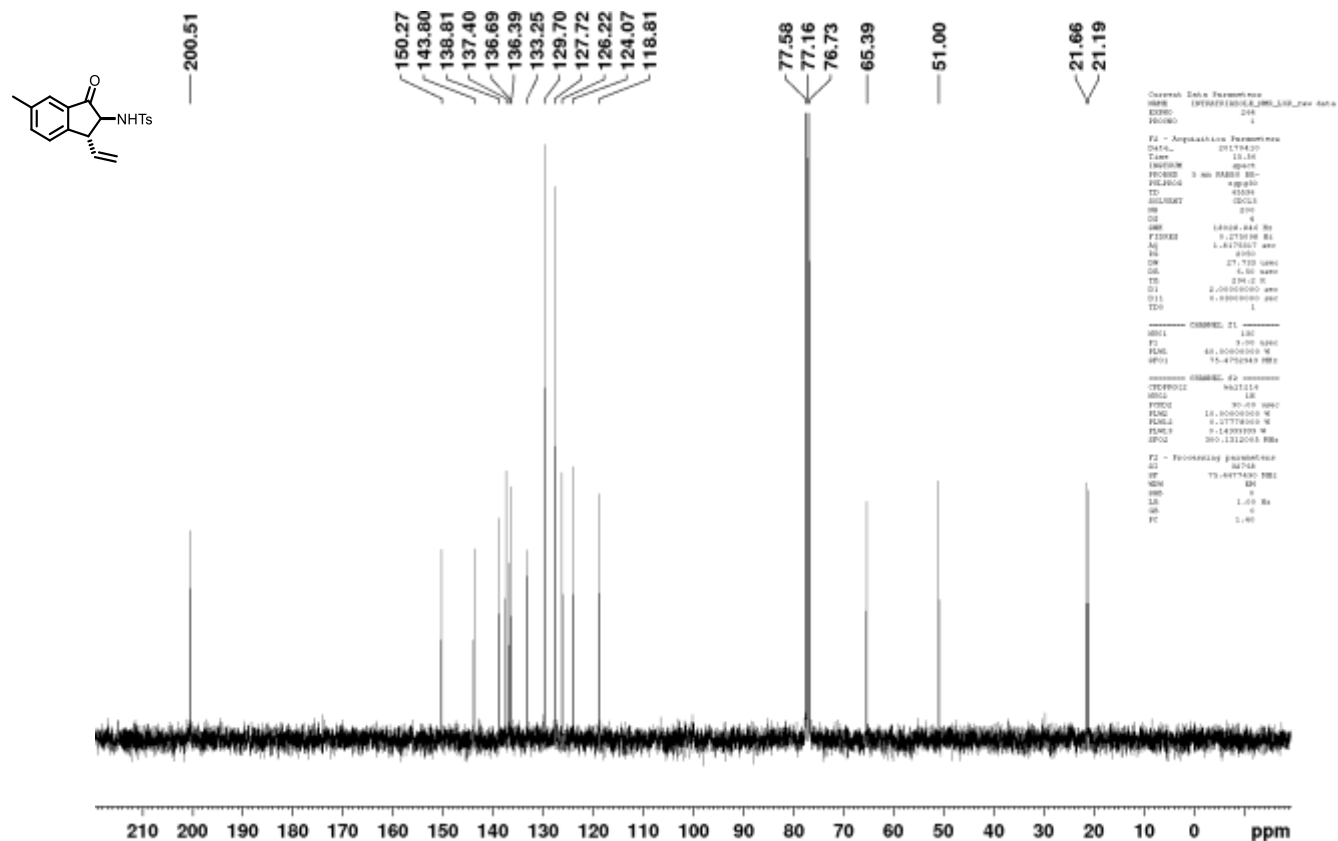



<sup>1</sup>H spectra of compound **3c** (crude)

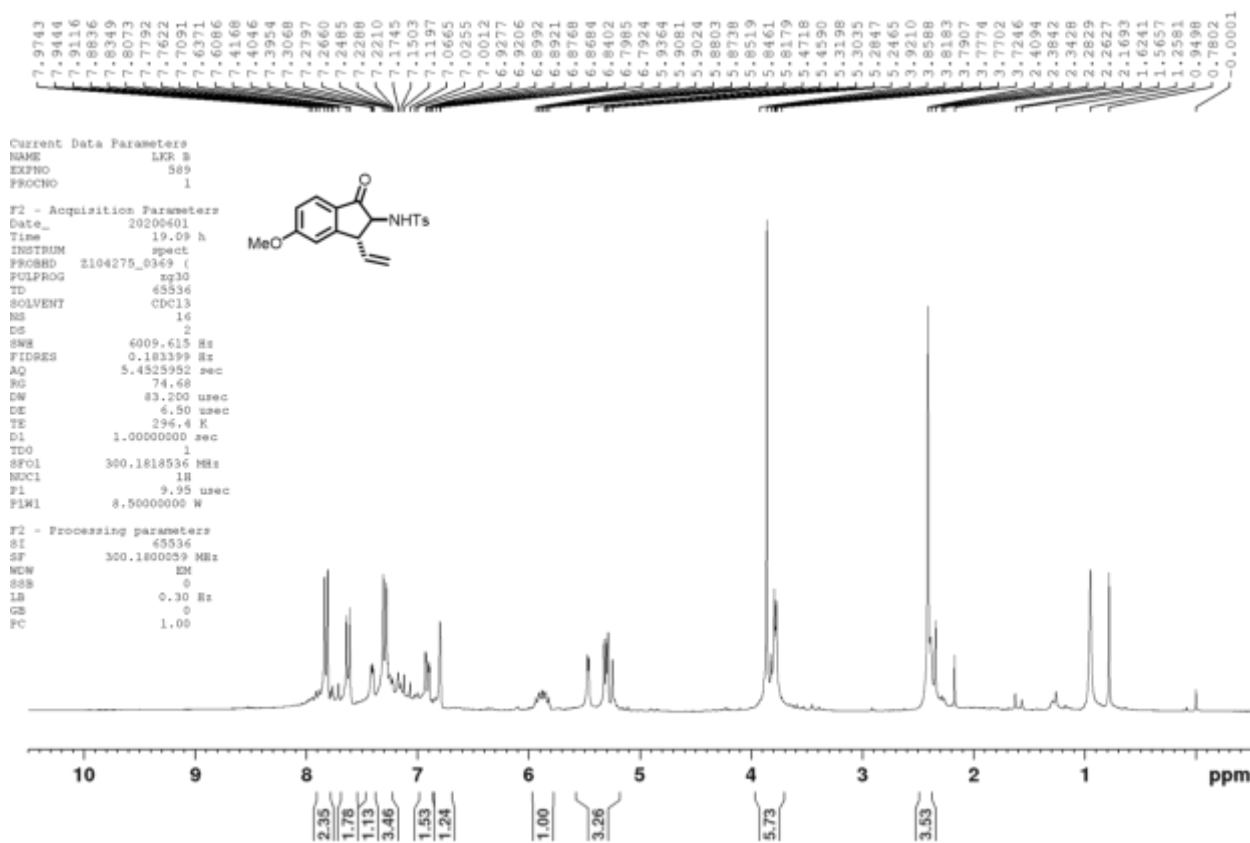

<sup>1</sup>H spectra of compound **3c** (*cis/trans* mixture after column chromatography)

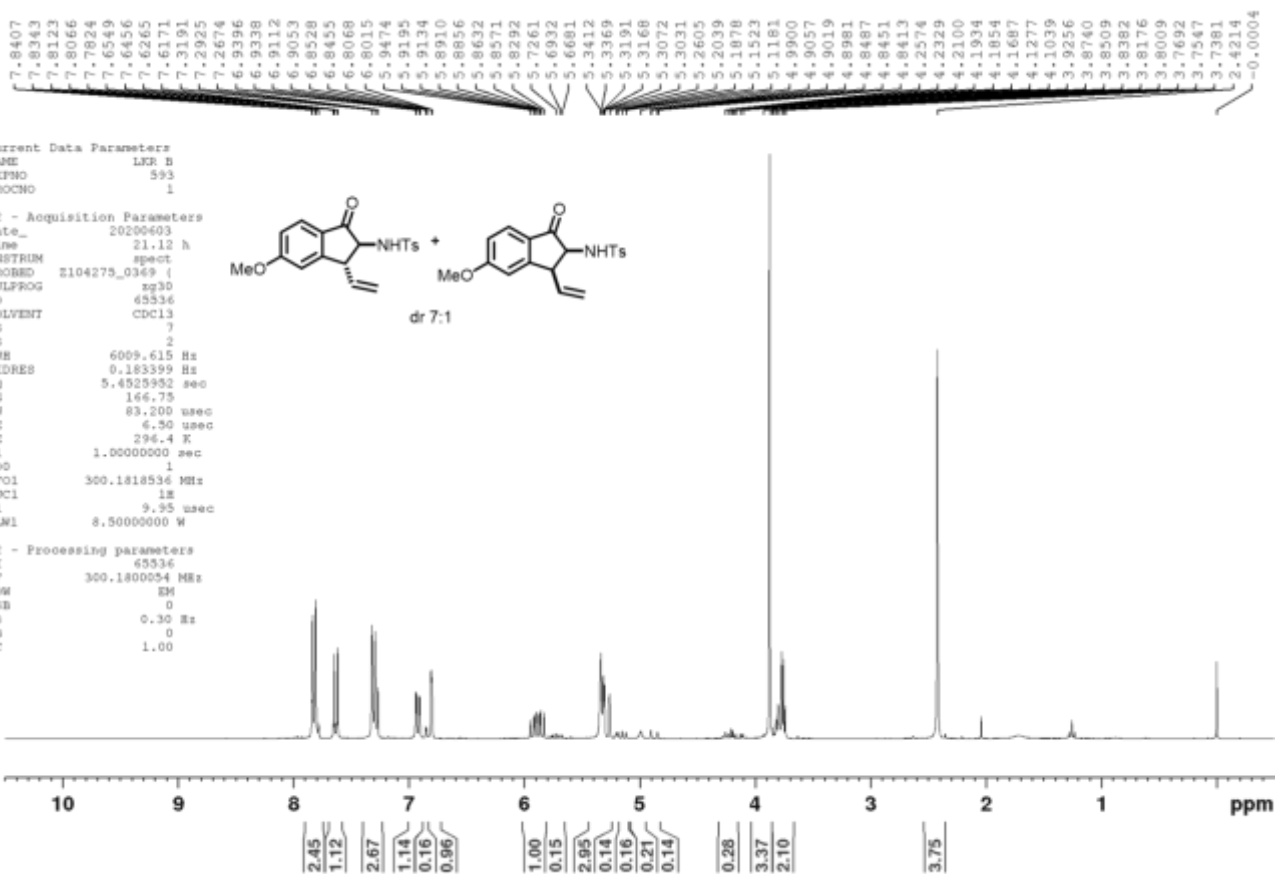

<sup>1</sup>H spectra of compound **3c** (*trans*)

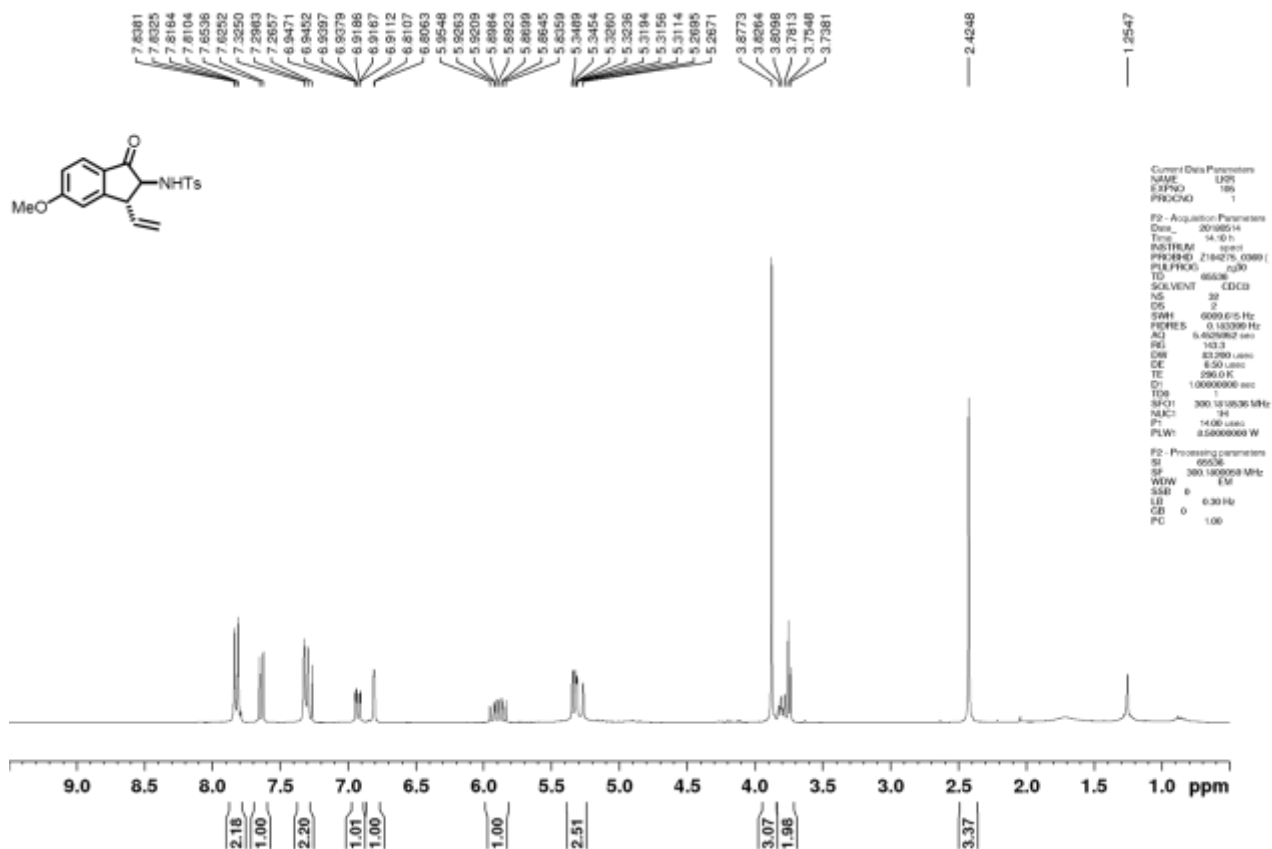

<sup>13</sup>C spectra of compound **3c** (*trans*)

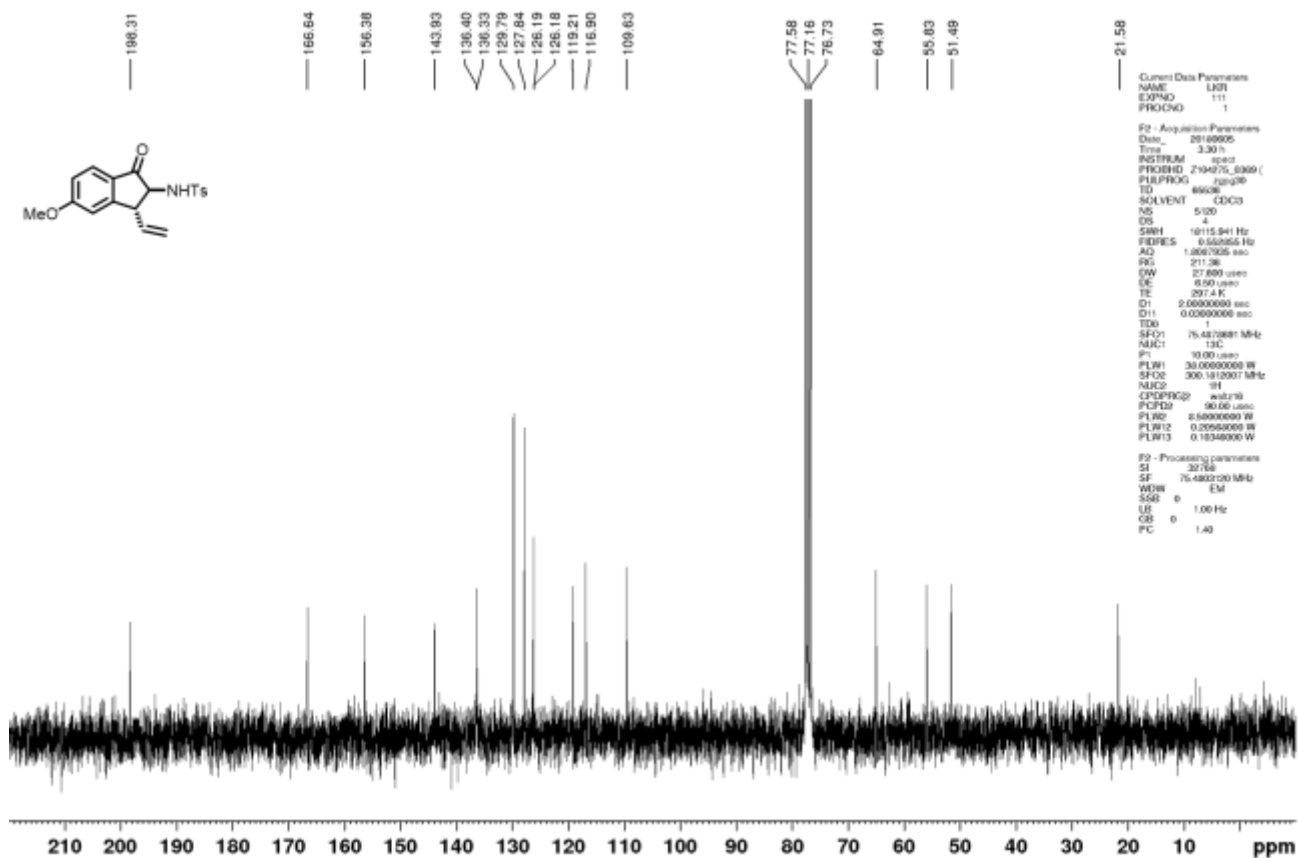

<sup>1</sup>H spectra of compound 3d (crude)

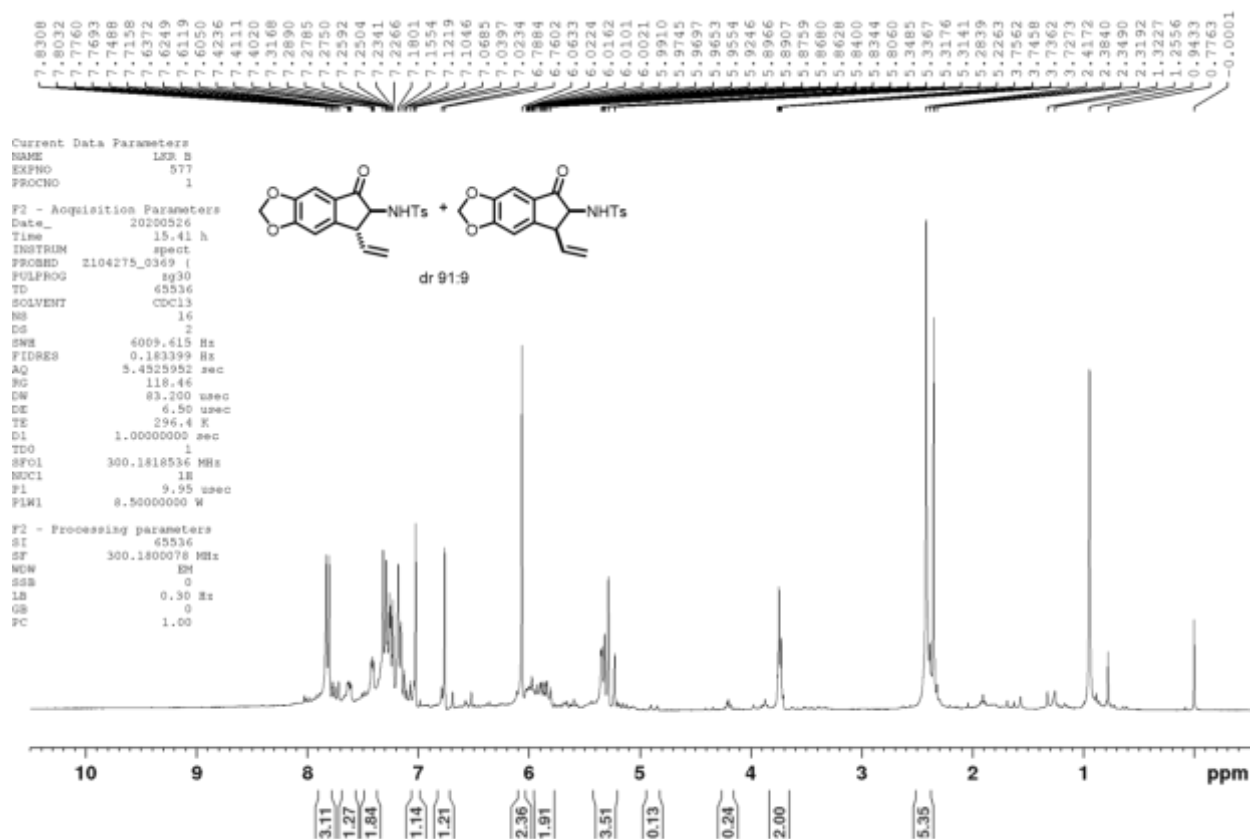

<sup>1</sup>H spectra of compound 3d (*cis/trans* mixture after column chromatography)

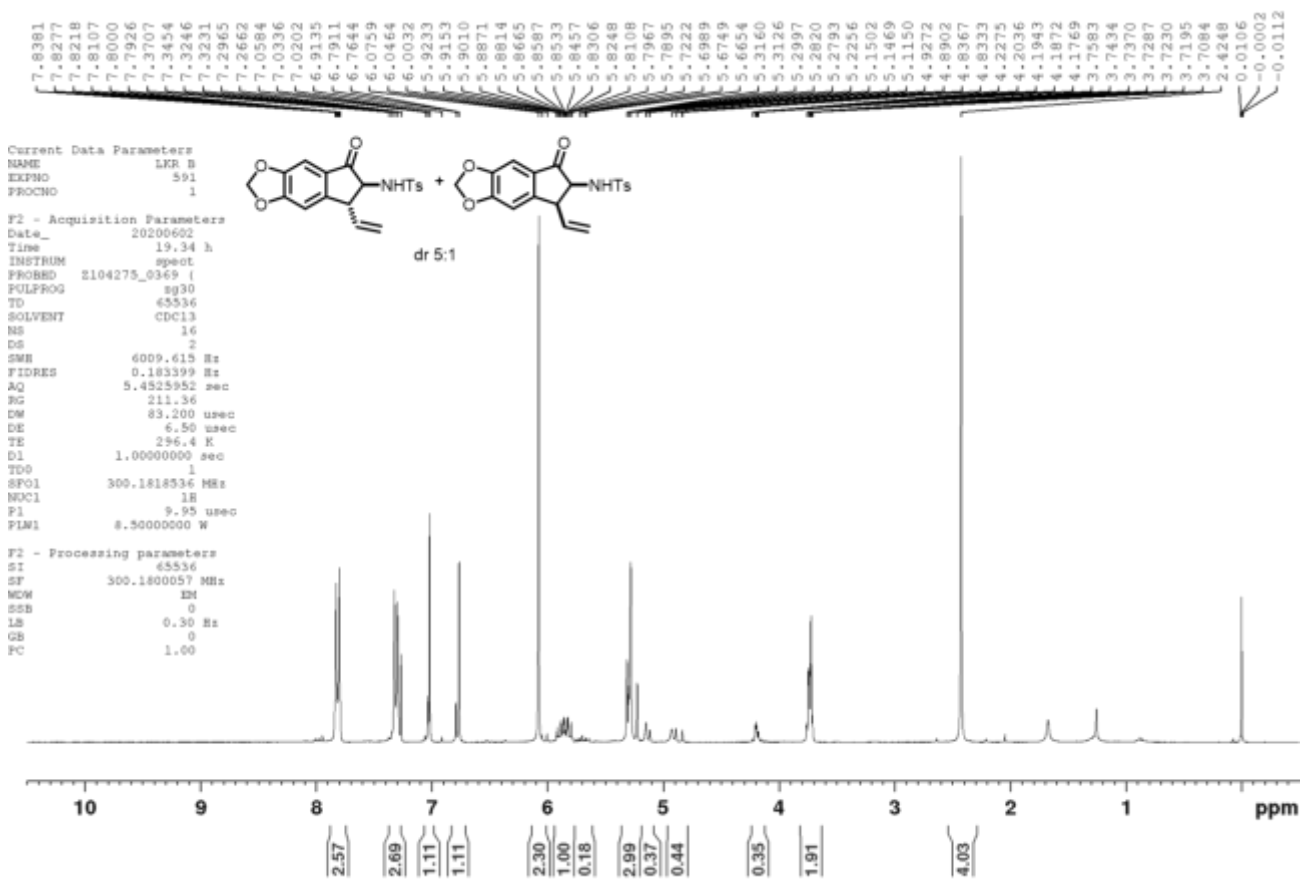

<sup>1</sup>H spectra of compound **3d** (*trans*)

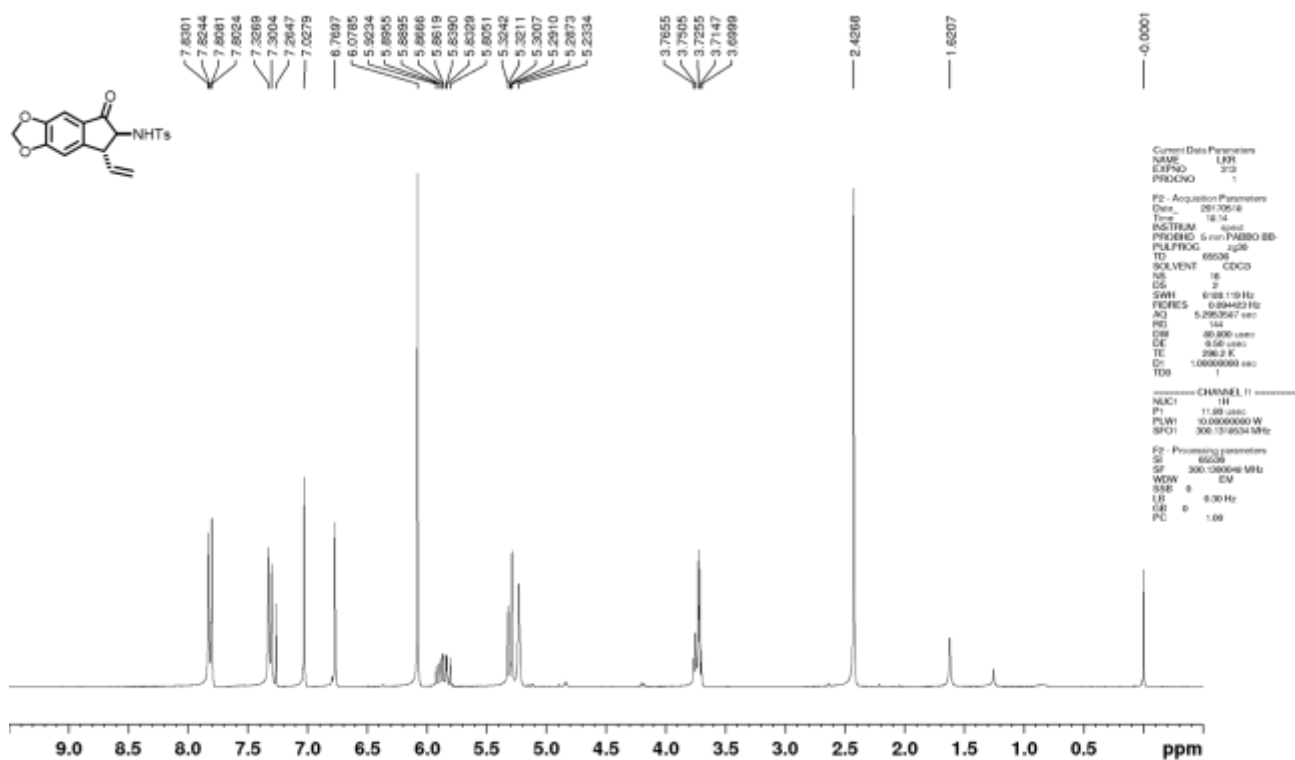

<sup>13</sup>C spectra of compound **3d** (*trans*)

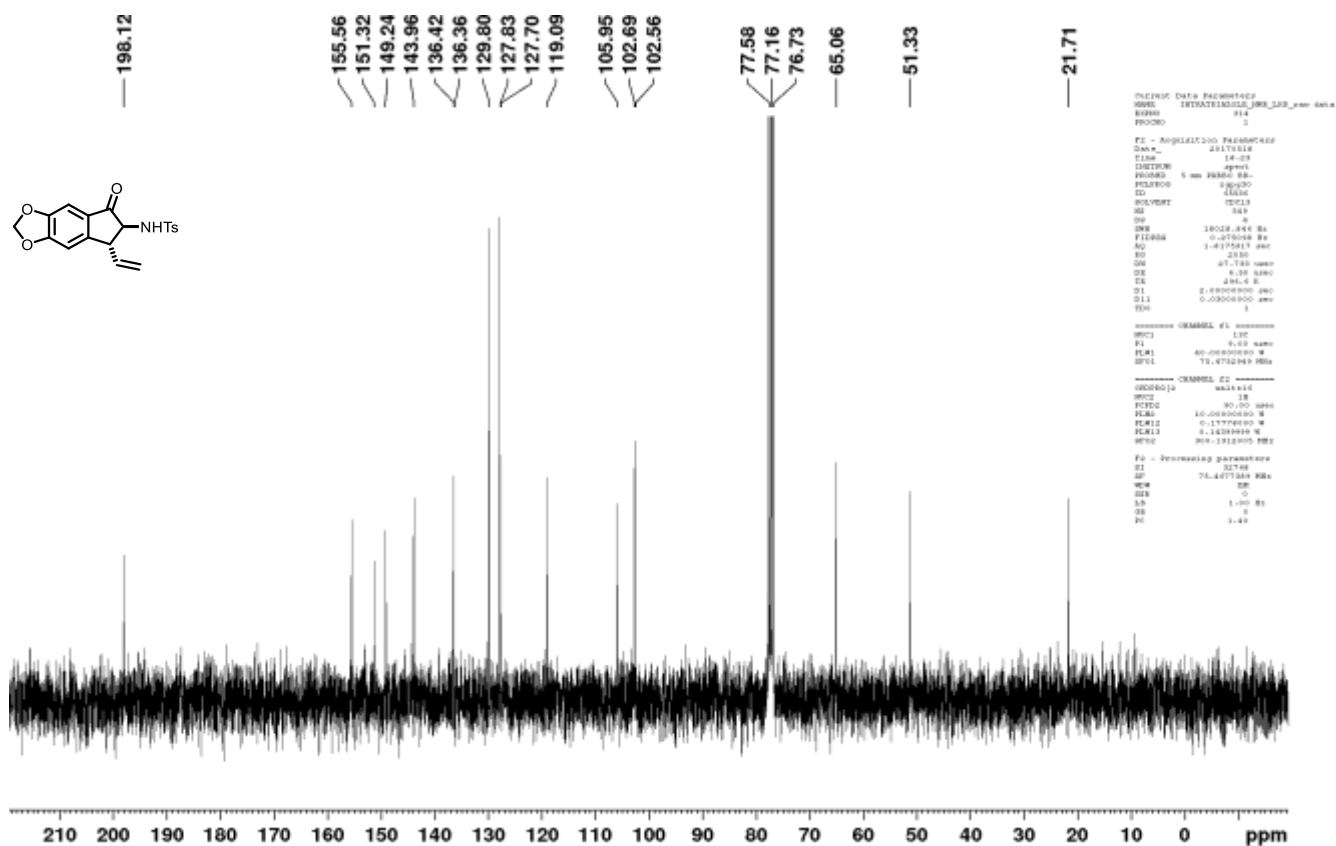

<sup>1</sup>H spectra of compound **3e** (crude)

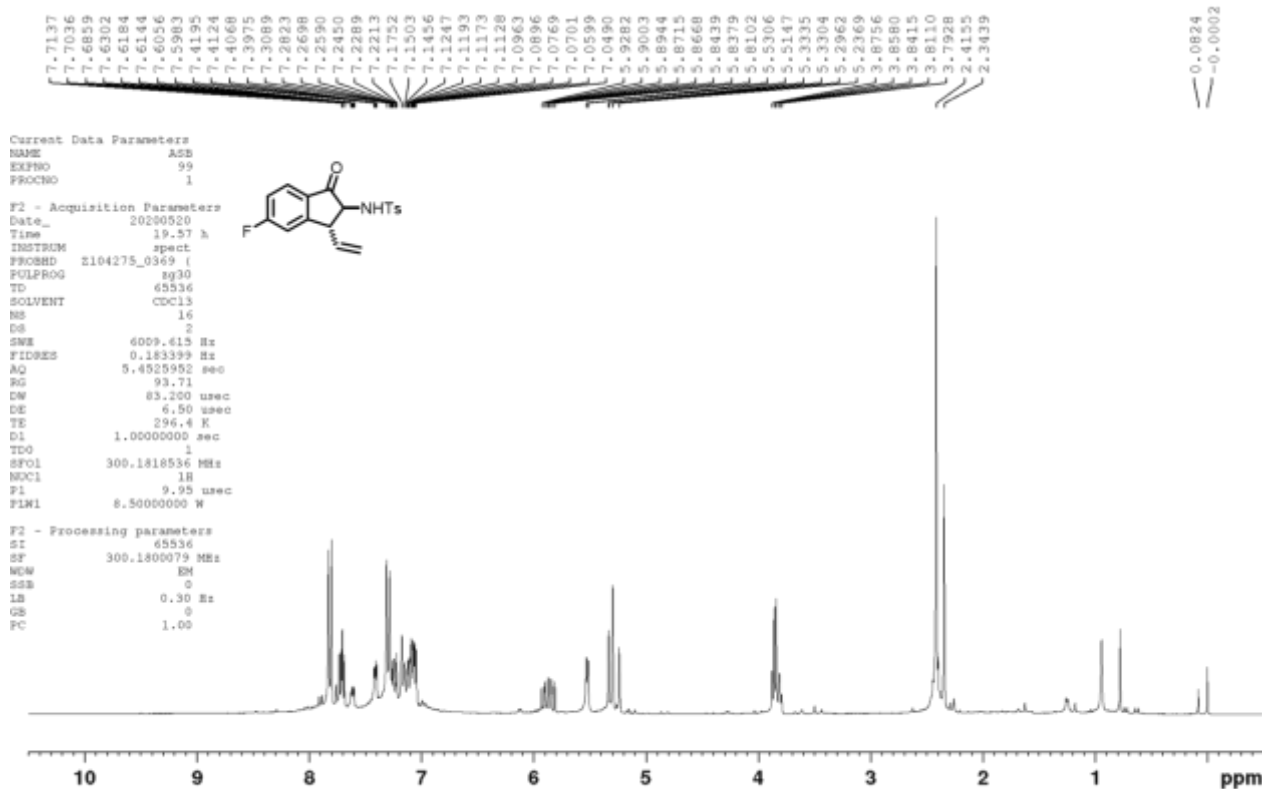

<sup>1</sup>H spectra of compound **3e** (*cis/trans* mixture after column chromatography)

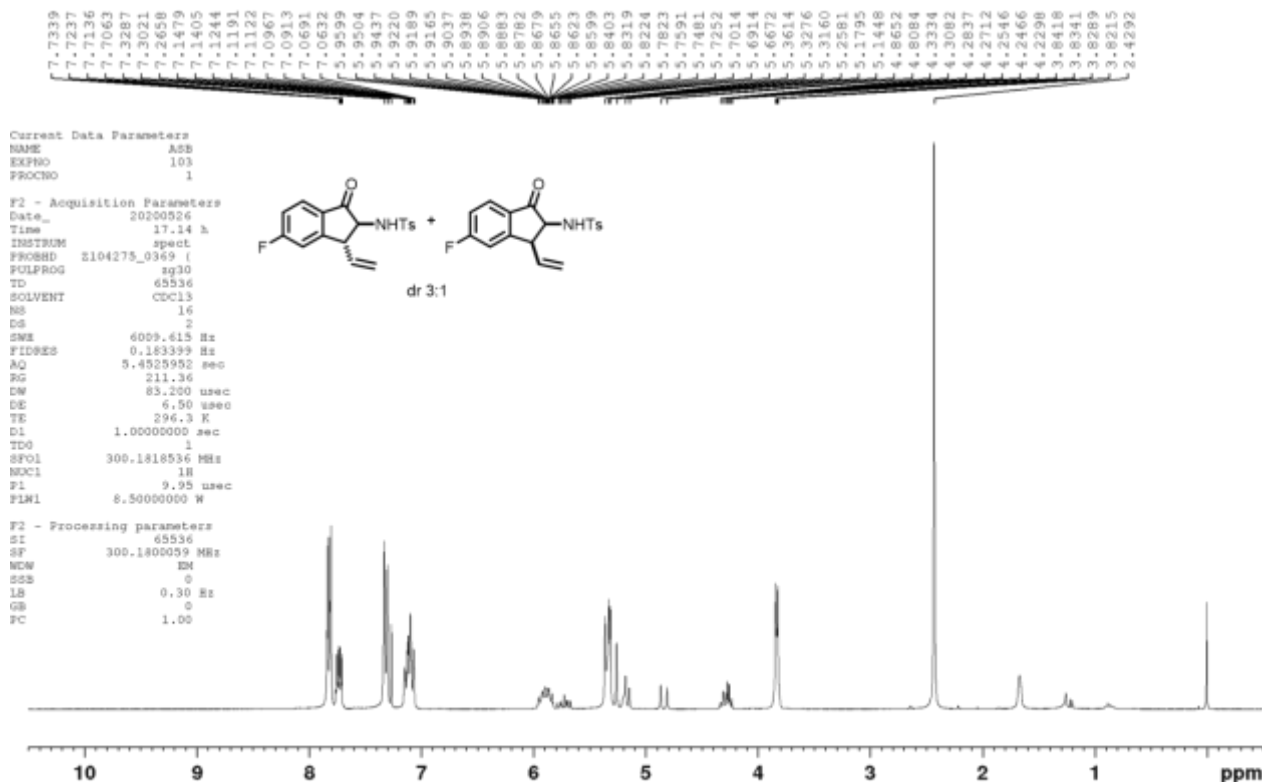

<sup>1</sup>H spectra of compound **3e** (*trans*)

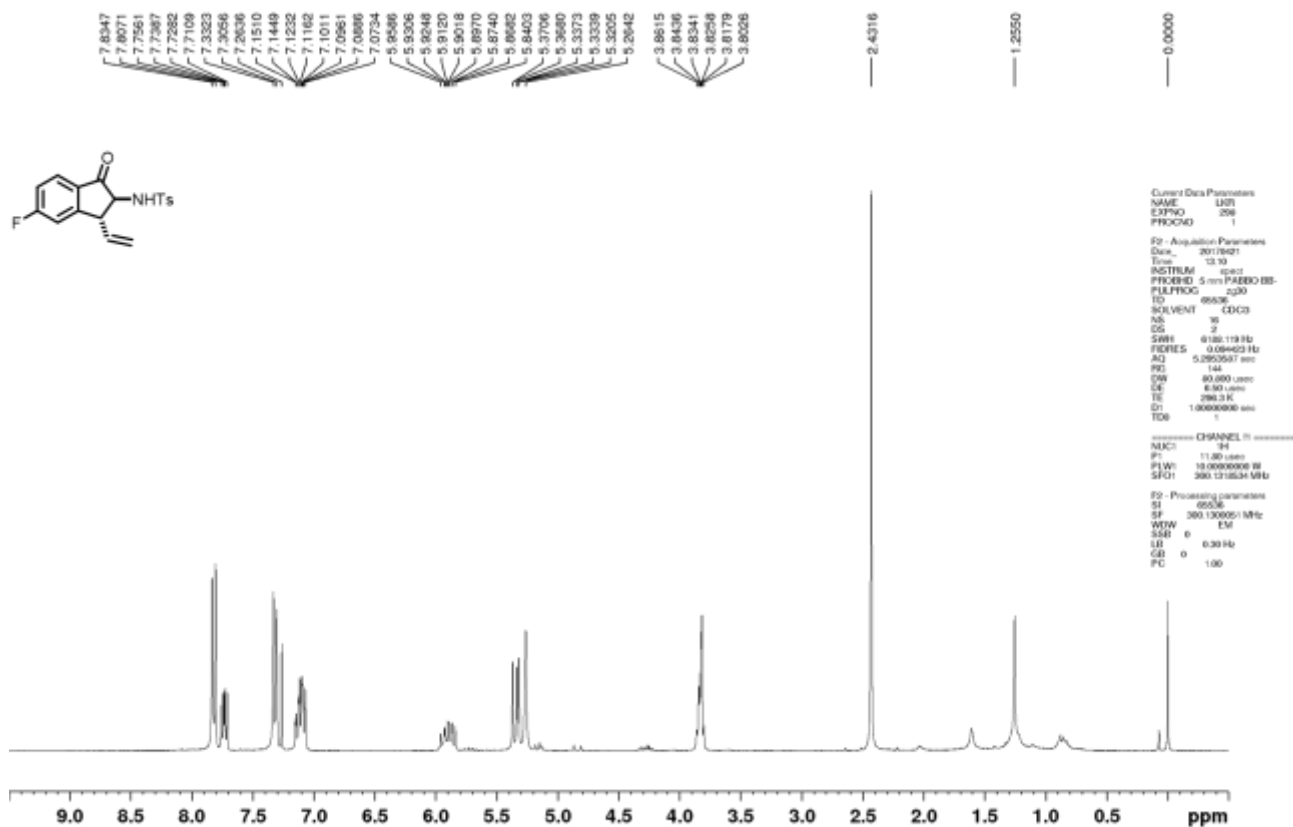

<sup>13</sup>C spectra of compound **3e** (*trans*)

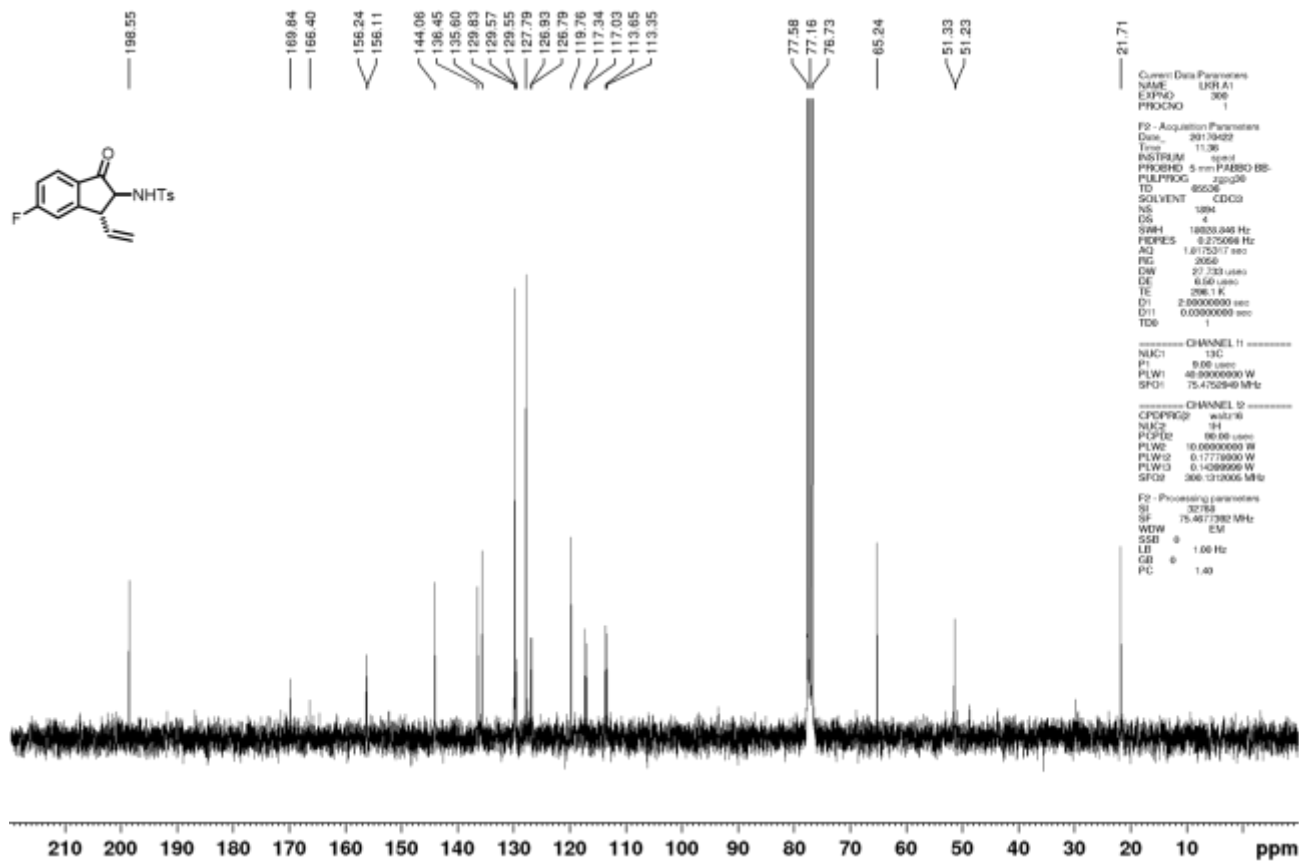

<sup>19</sup>F spectra of compound **3e**

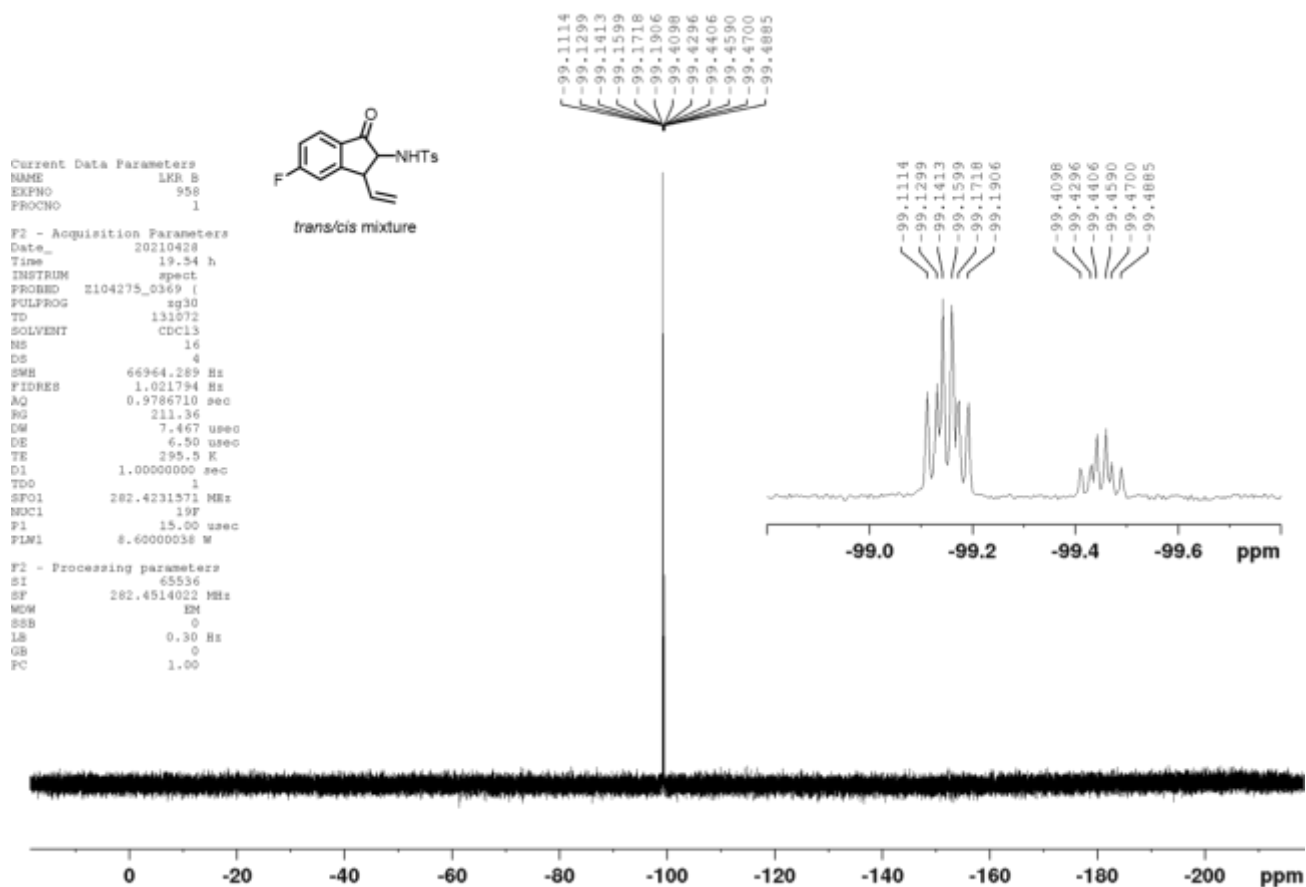

<sup>1</sup>H spectra of compound **3g** (crude)

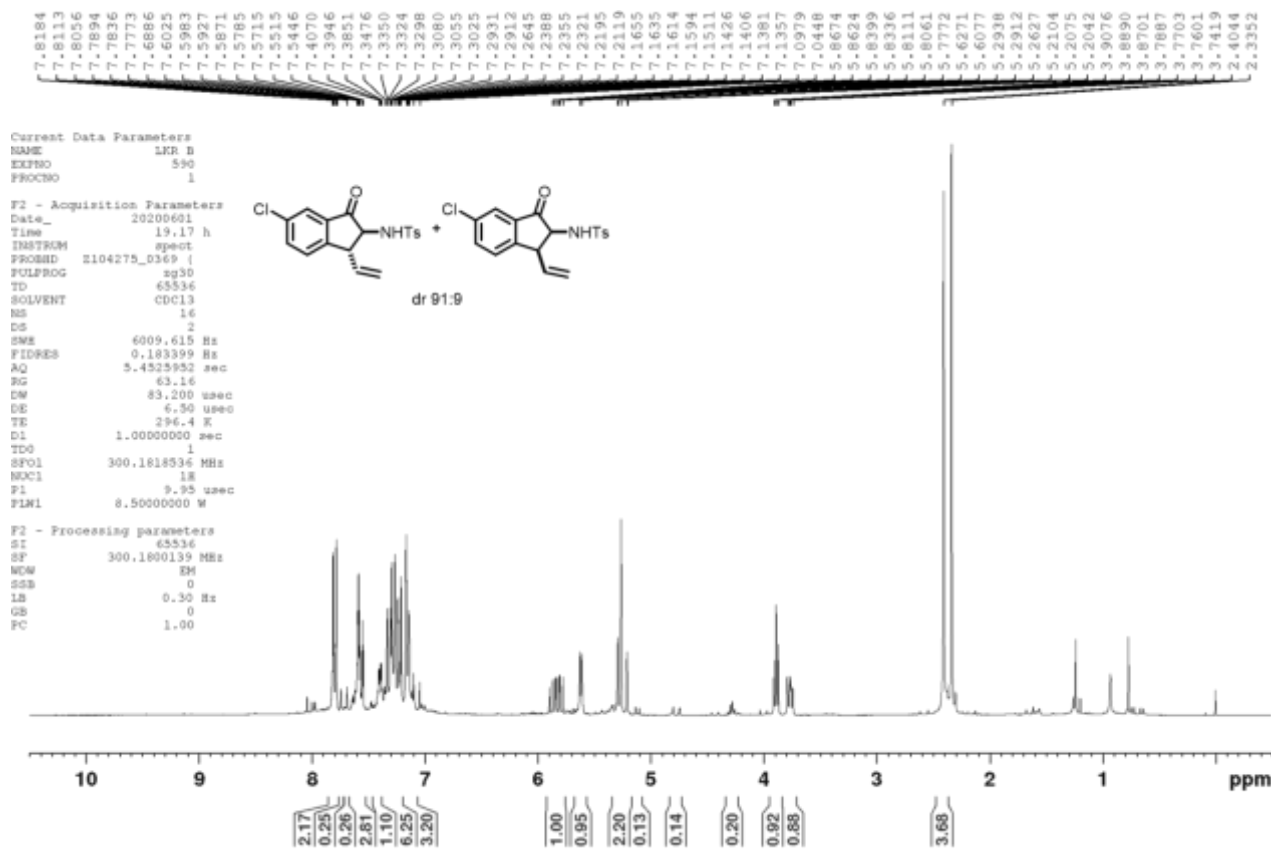

<sup>1</sup>H spectra of compound **3g** (*cis/trans* mixture after column chromatography)

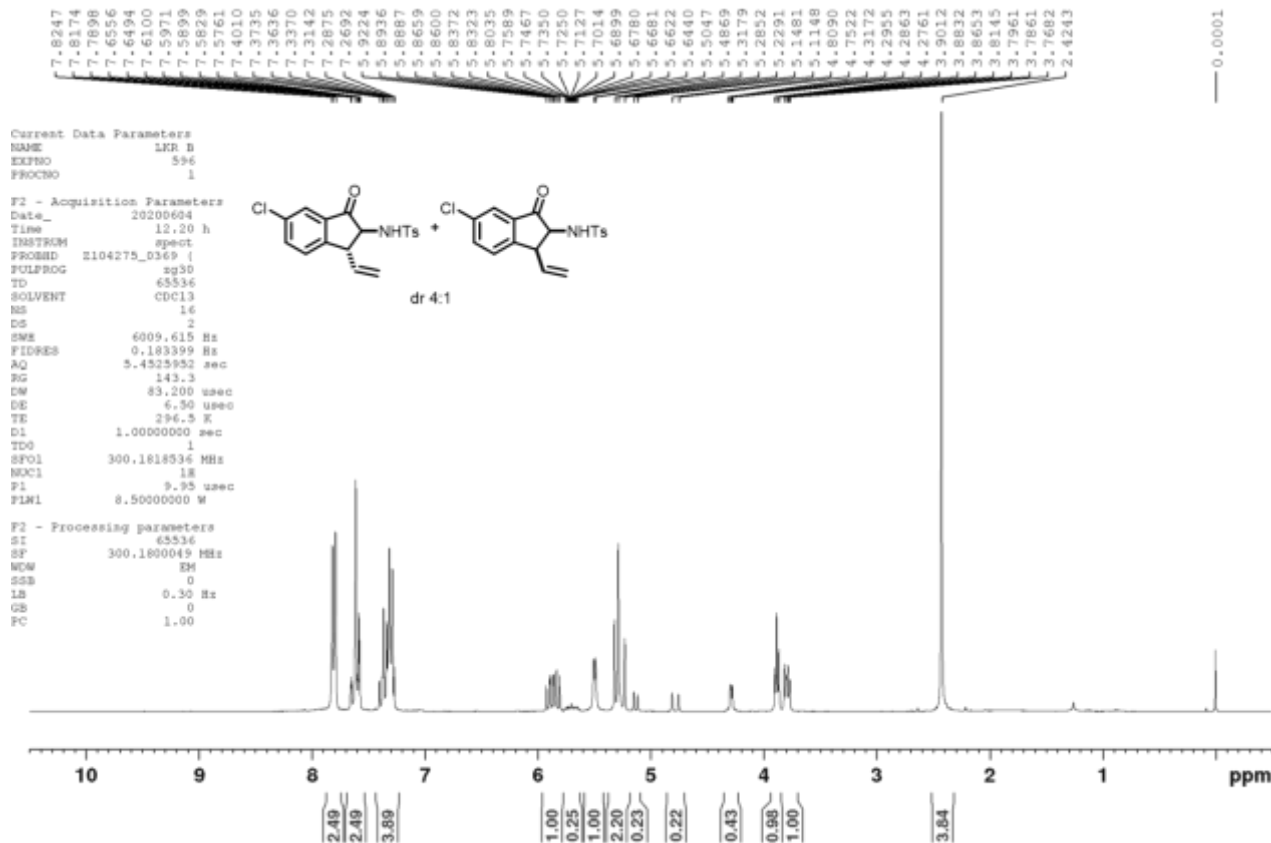



<sup>1</sup>H spectra of compound **3g** (*trans*)

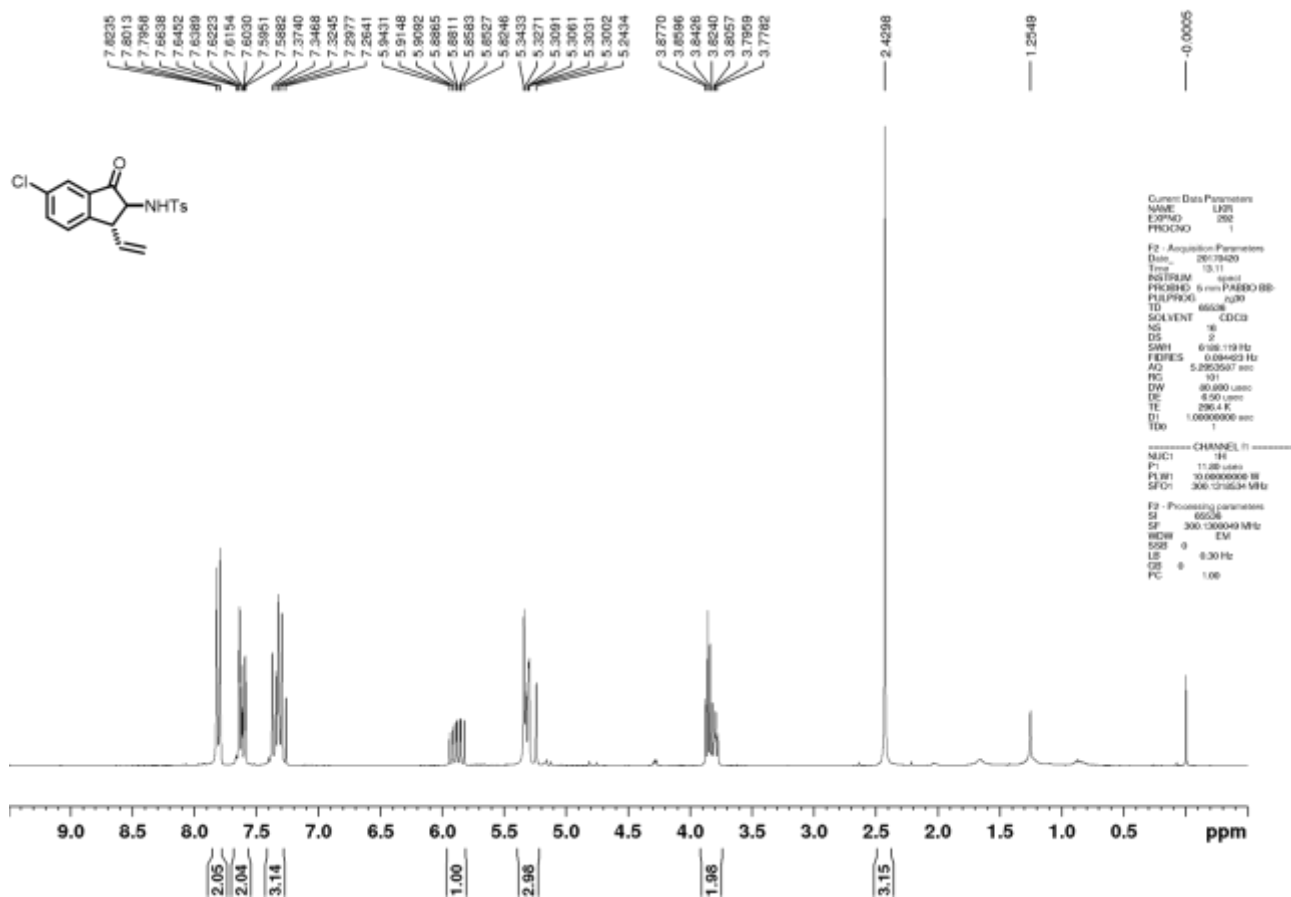

<sup>13</sup>C spectra of compound **3g** (*trans*)

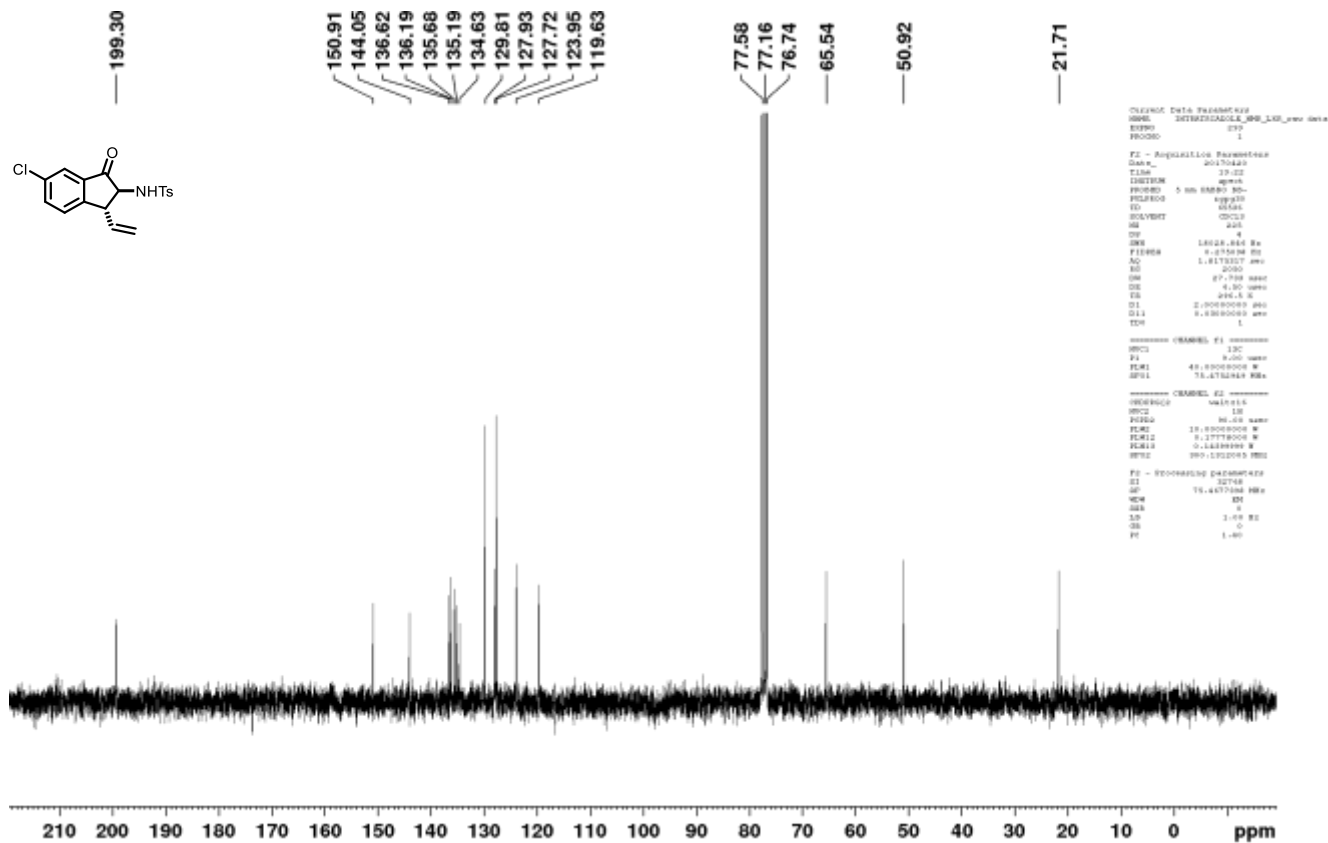

<sup>1</sup>H spectra of compound **3h** (*cis/trans* mixture after short silica filter)

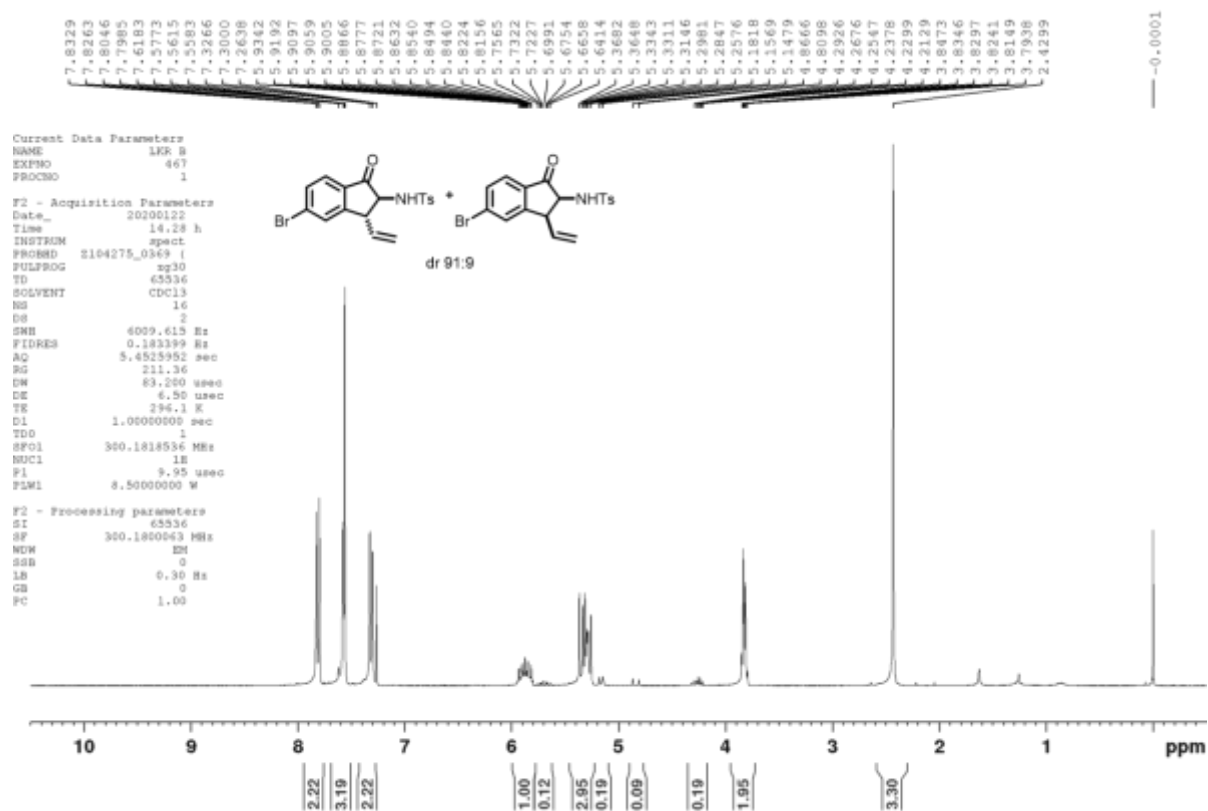

**Note.**

The <sup>1</sup>H NMR spectra of crude mixture of **3h** was too complicated to be identified, in addition, *cis/trans* mixture of **3h** was inseparable. Thus, <sup>1</sup>H NMR spectra of *cis/trans* mixture after short silica filter has been attached above.

<sup>13</sup>C spectra of compound **3h** (*trans*)

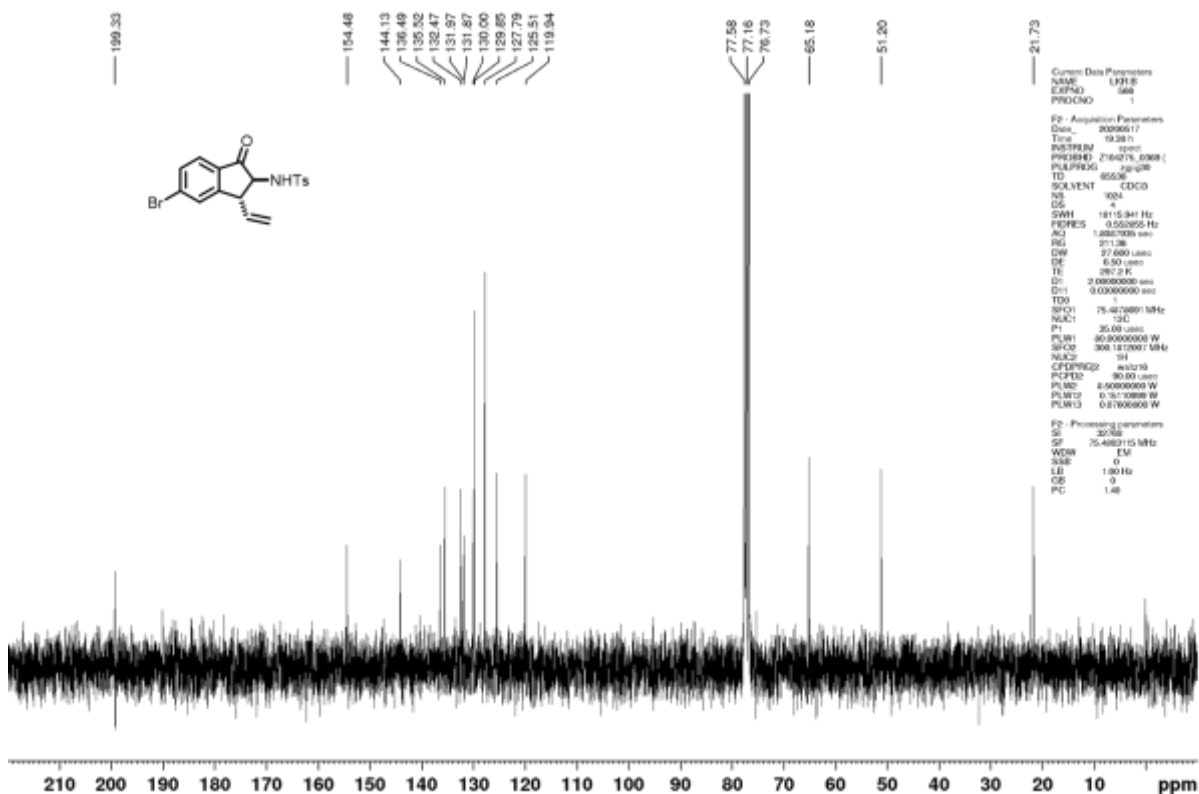

<sup>1</sup>H spectra of compound **3i** (crude)

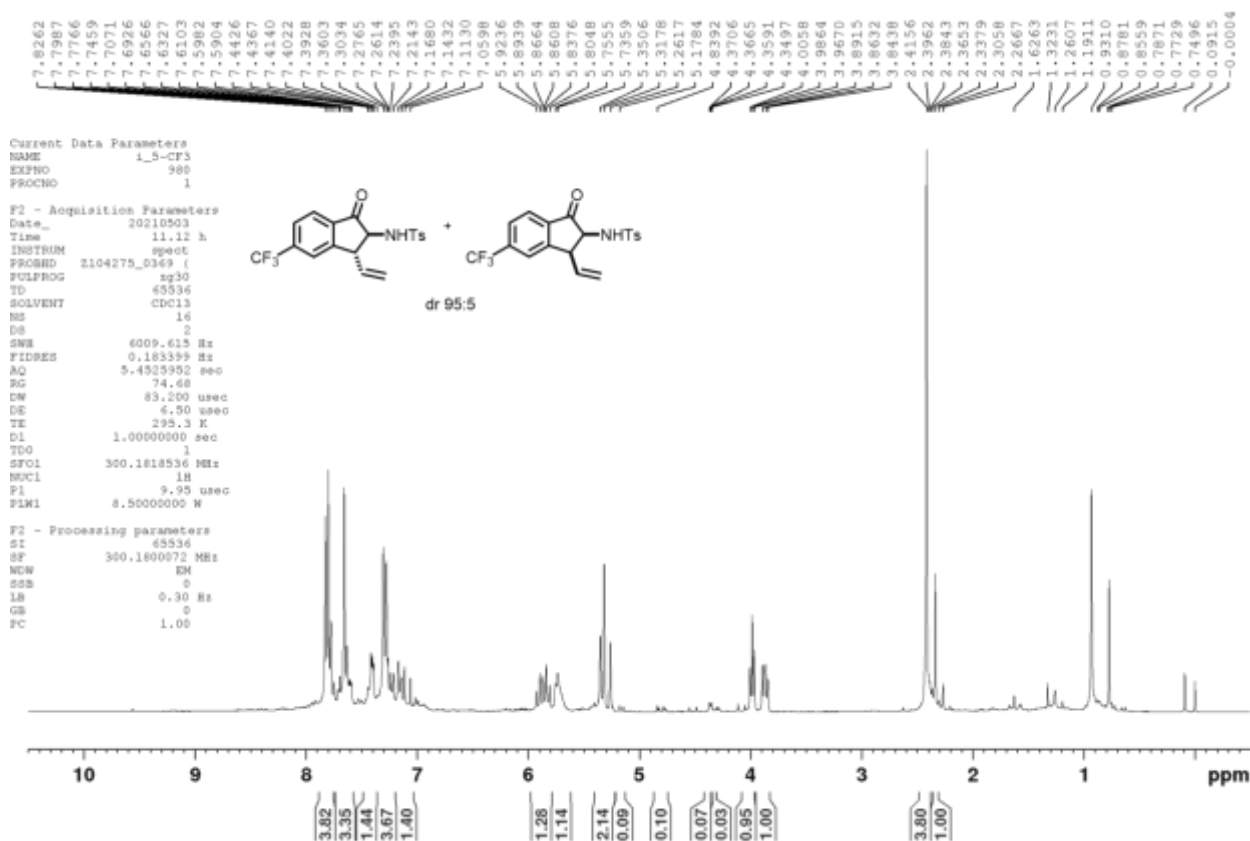

<sup>1</sup>H spectra of compound **3i** (*cis/trans* mixture after column chromatography)

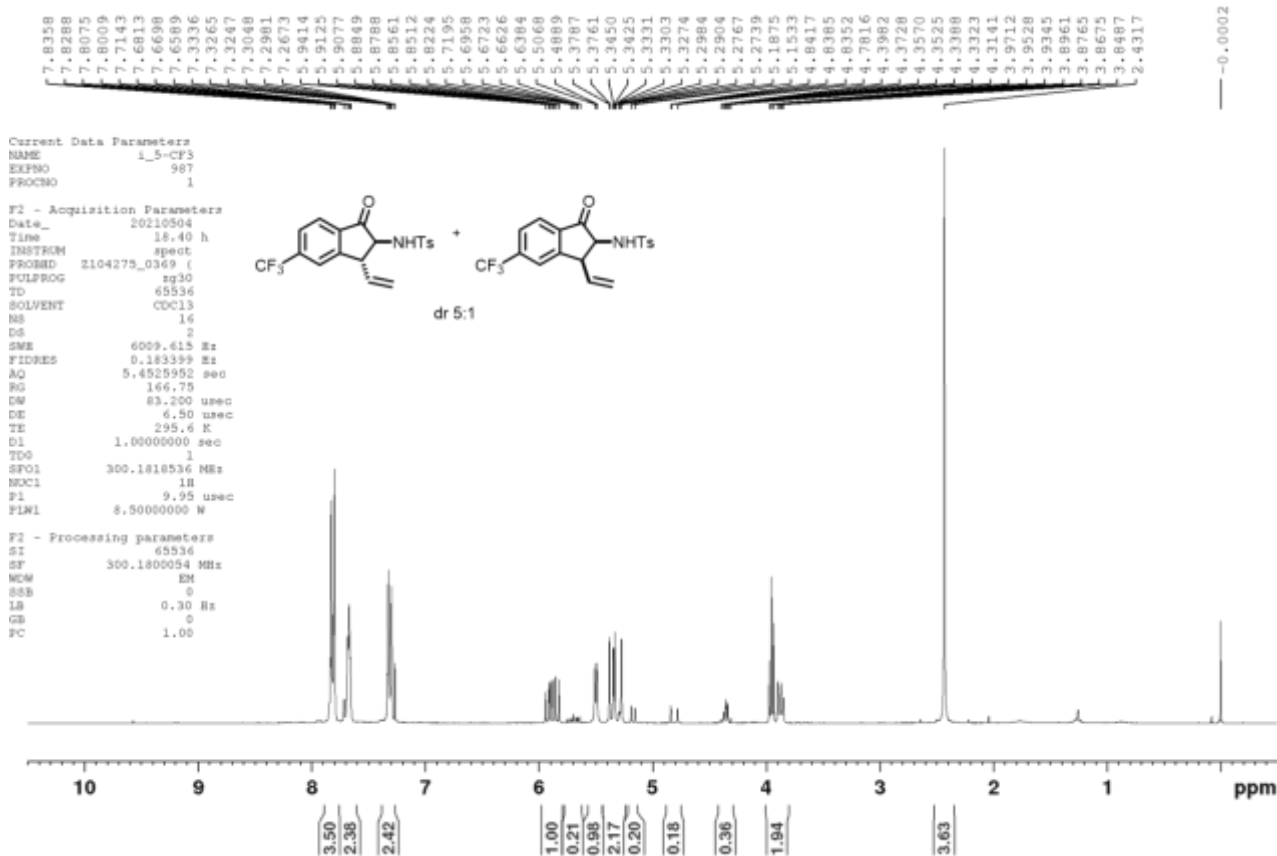

<sup>1</sup>H spectra of compound **3i** (*trans*)

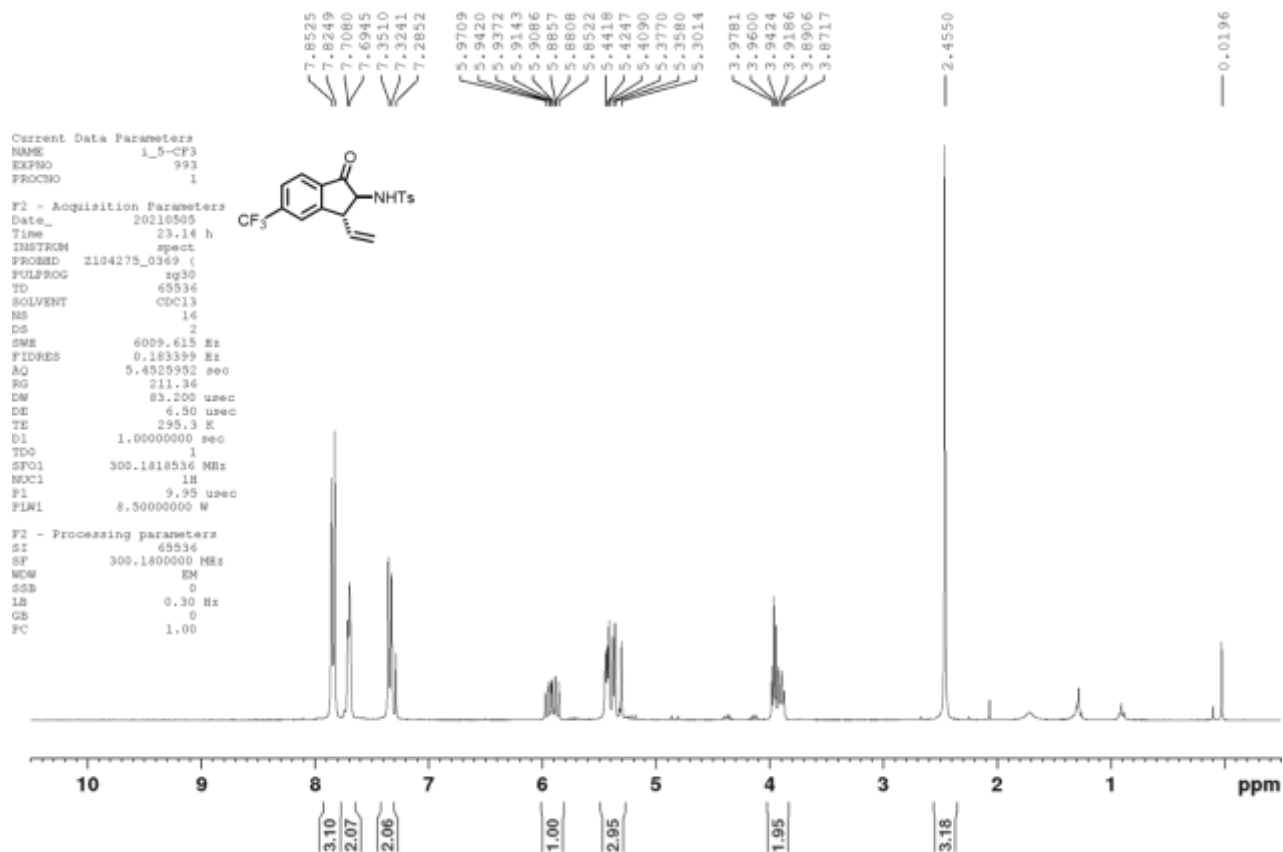

<sup>13</sup>C spectra of compound **3i** (*trans*)

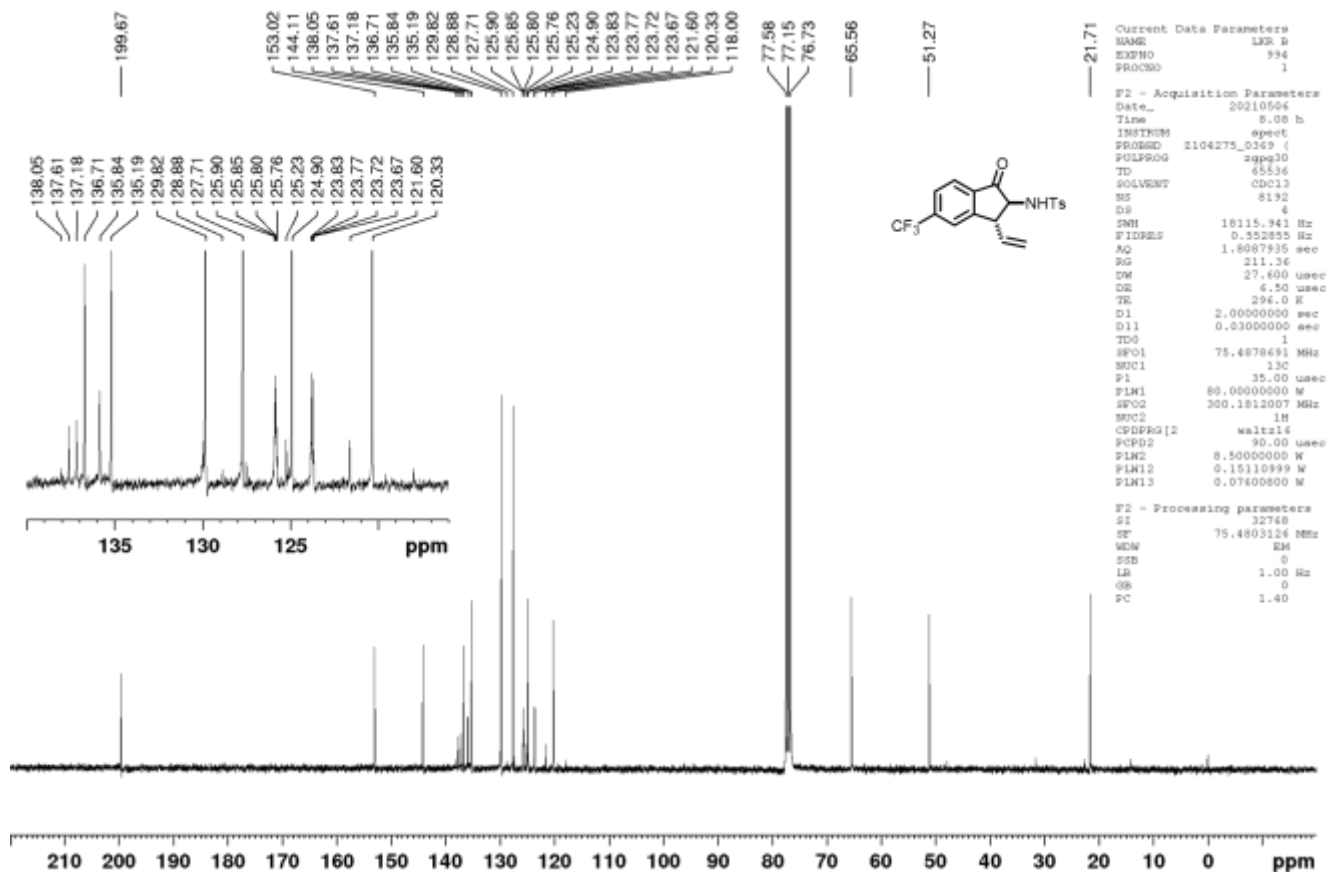

<sup>19</sup>F spectra of compound **3i**

Current Data Parameters  
NAME 1\_5-CF3  
EXPNO 986  
PROCNO 1

F2 - Acquisition Parameters  
Date\_ 20210504  
Time 18.34 h  
INSTRUM spect  
PROBHD z104275\_0369\_1  
PULPROG zg30  
TD 131072  
SOLVENT CDCl3  
NS 16  
DS 4  
SMR 66964.289 Hz  
FIDRES 1.021794 Hz  
AQ 0.9786710 sec  
RG 211.36  
DM 7.467 usec  
DE 6.50 usec  
TE 295.4 K  
D1 1.00000000 sec  
TDO 1  
SFO1 282.4231571 MHz  
NUC1 19F  
F1 15.00 usec  
PLW1 8.60000038 W

F2 - Processing parameters  
SI 65536  
SF 282.4514022 MHz  
WDW EM  
SSB 0  
LB 0.30 Hz  
GB 0  
FC 1.00

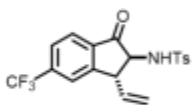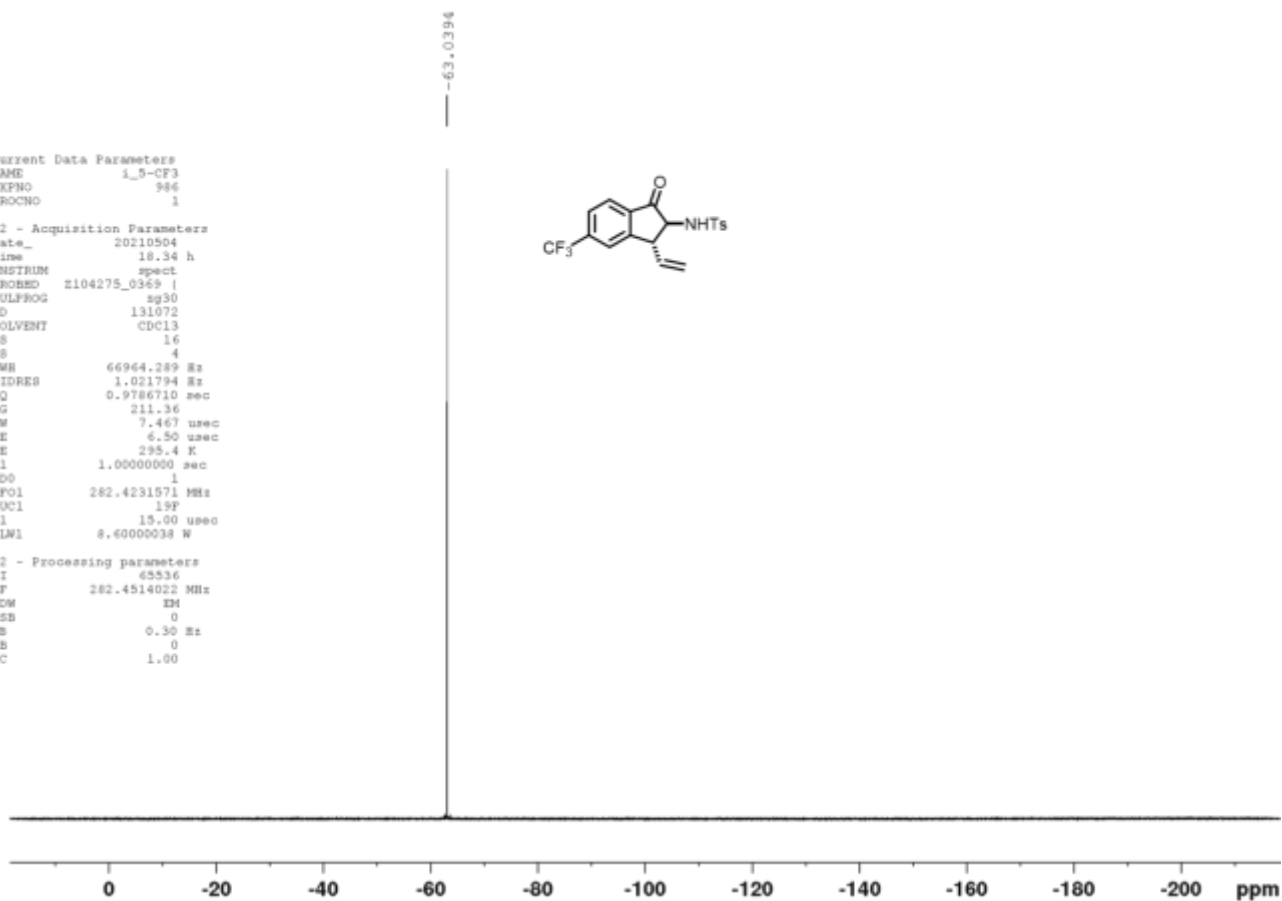

<sup>1</sup>H spectra of compound **3k** (crude)

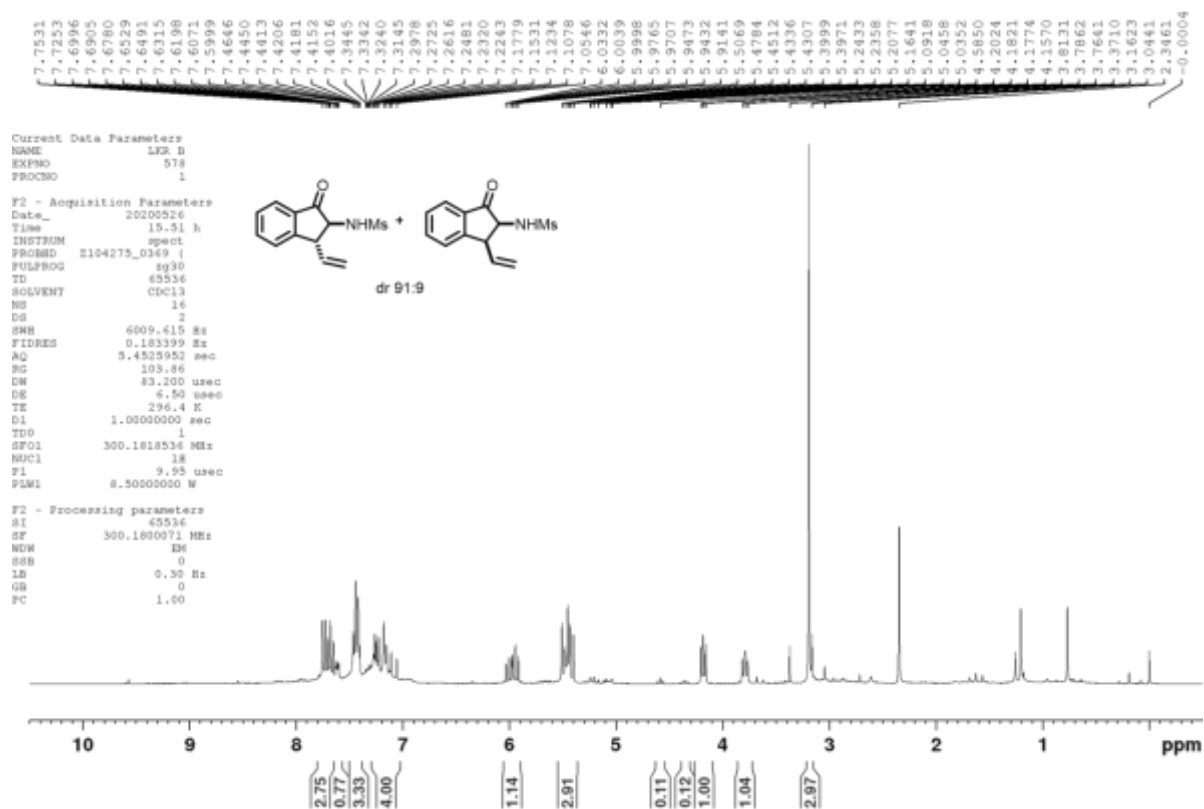

**Note.**

The *cis/trans* mixture of **3k** was inseparable. Thus, <sup>1</sup>H NMR spectra of *cis/trans* mixture after silica column chromatography has been attached below.

<sup>1</sup>H spectra of compound **3k** (*cis/trans* mixture after column chromatography)

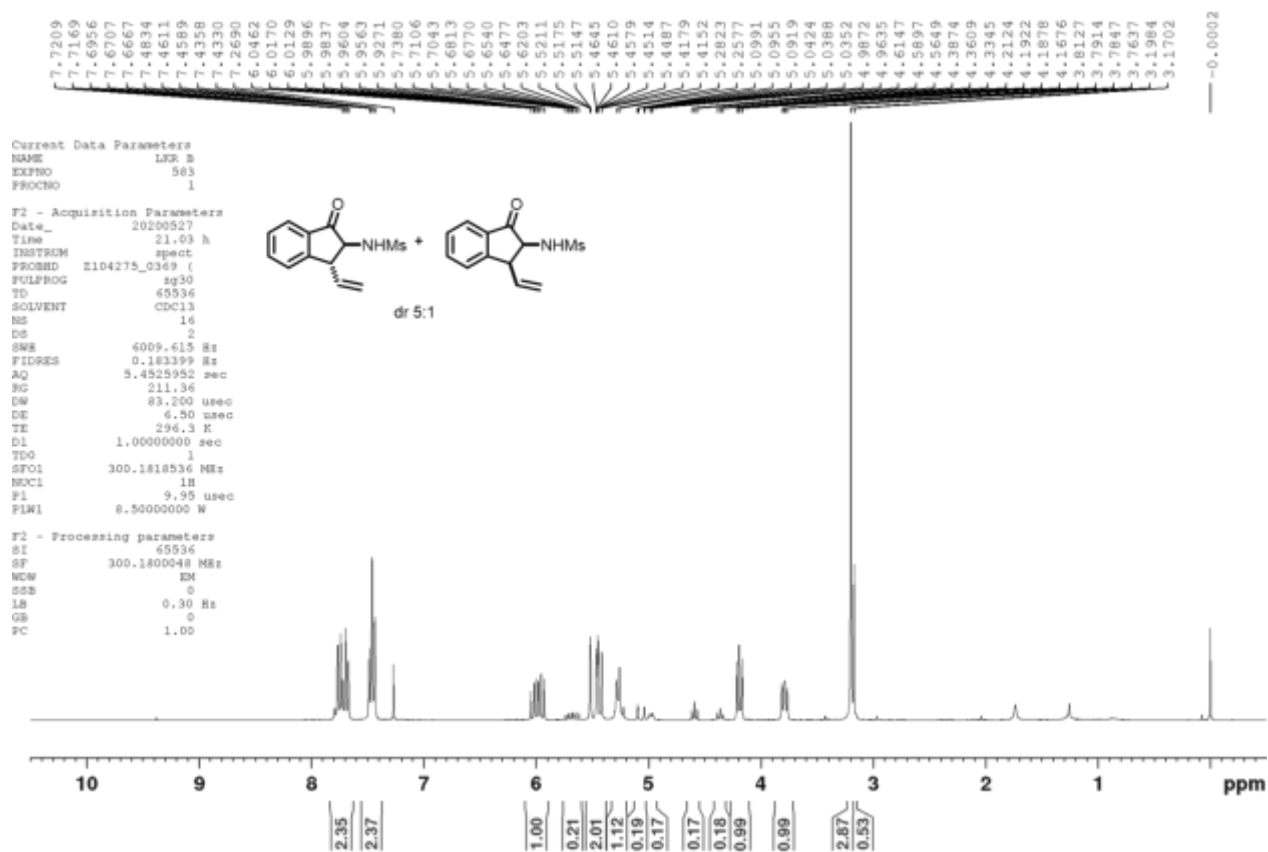

<sup>13</sup>C spectra of compound **3k** (*trans*)

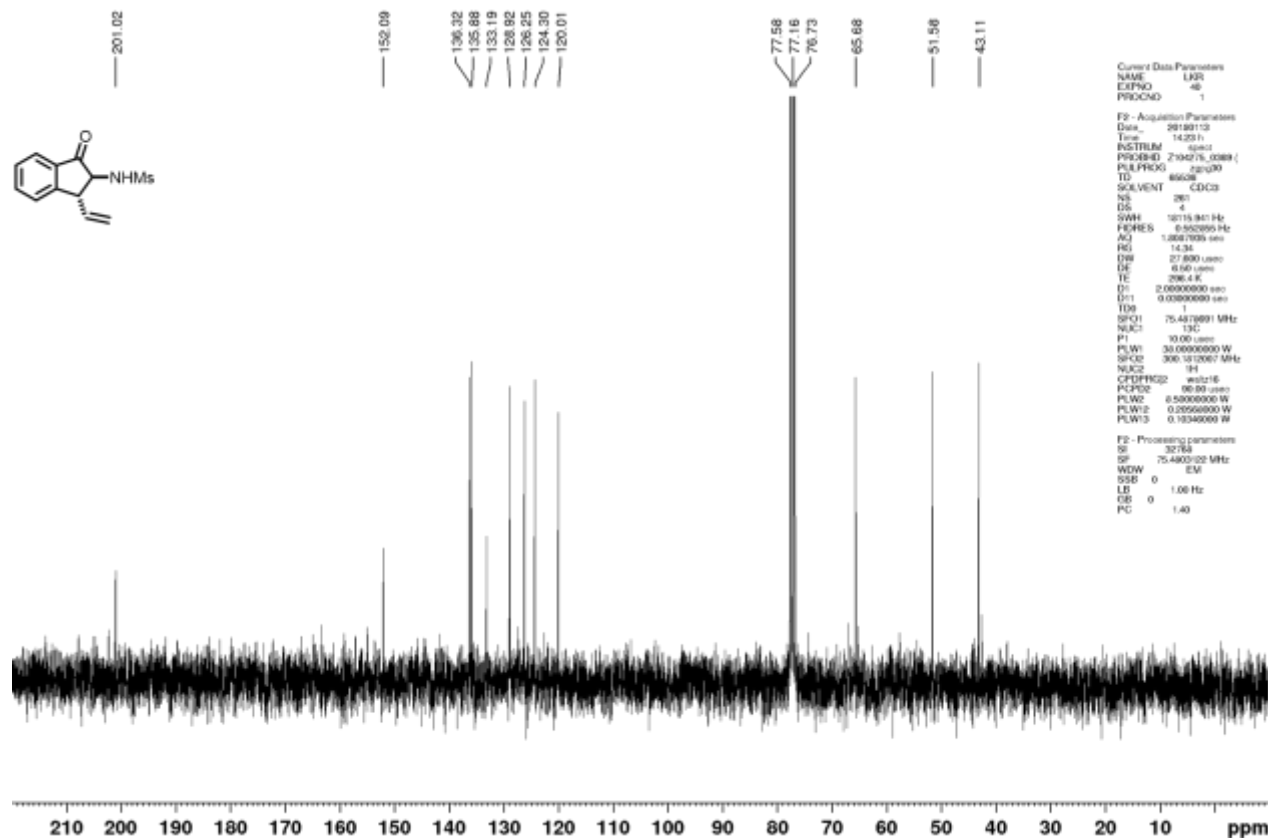

<sup>1</sup>H spectra of compound 4a

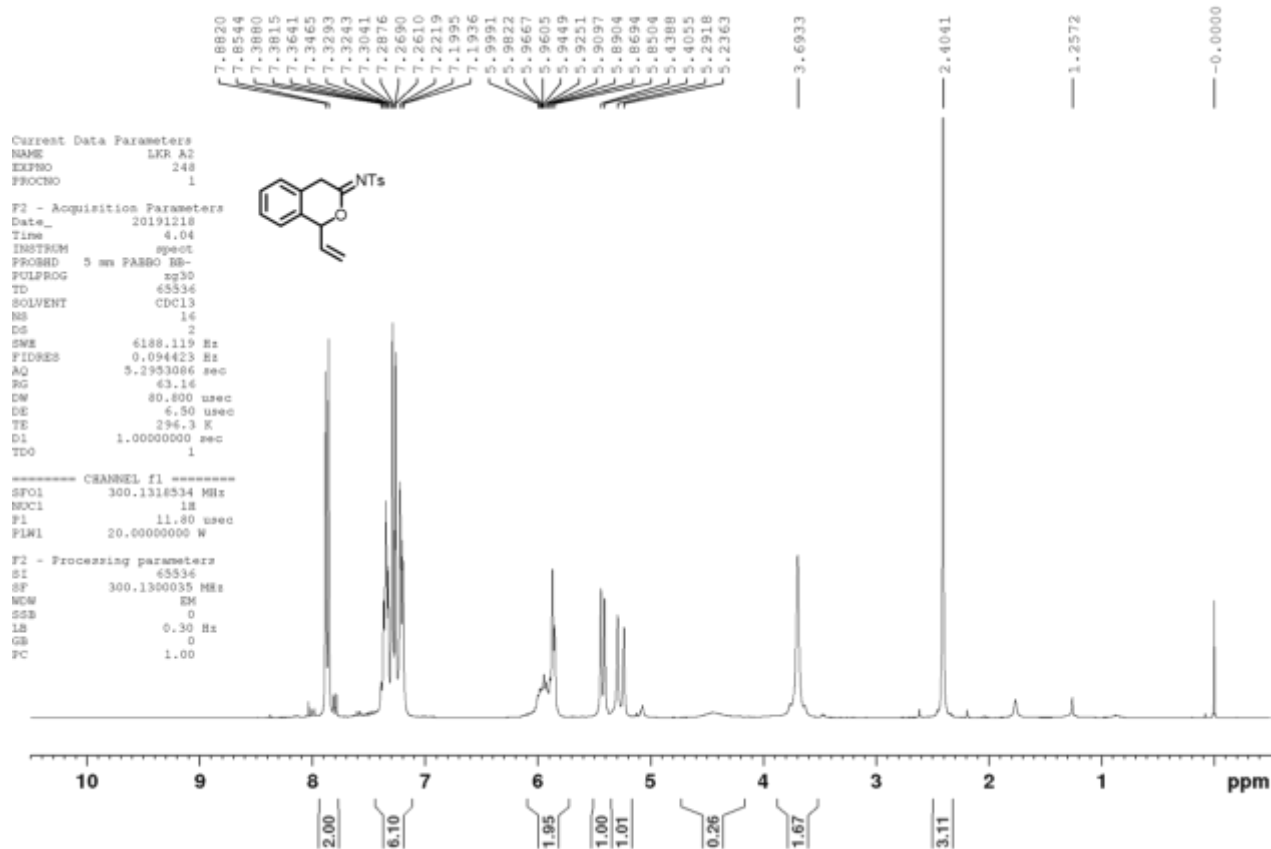

<sup>13</sup>C spectra of compound 4a

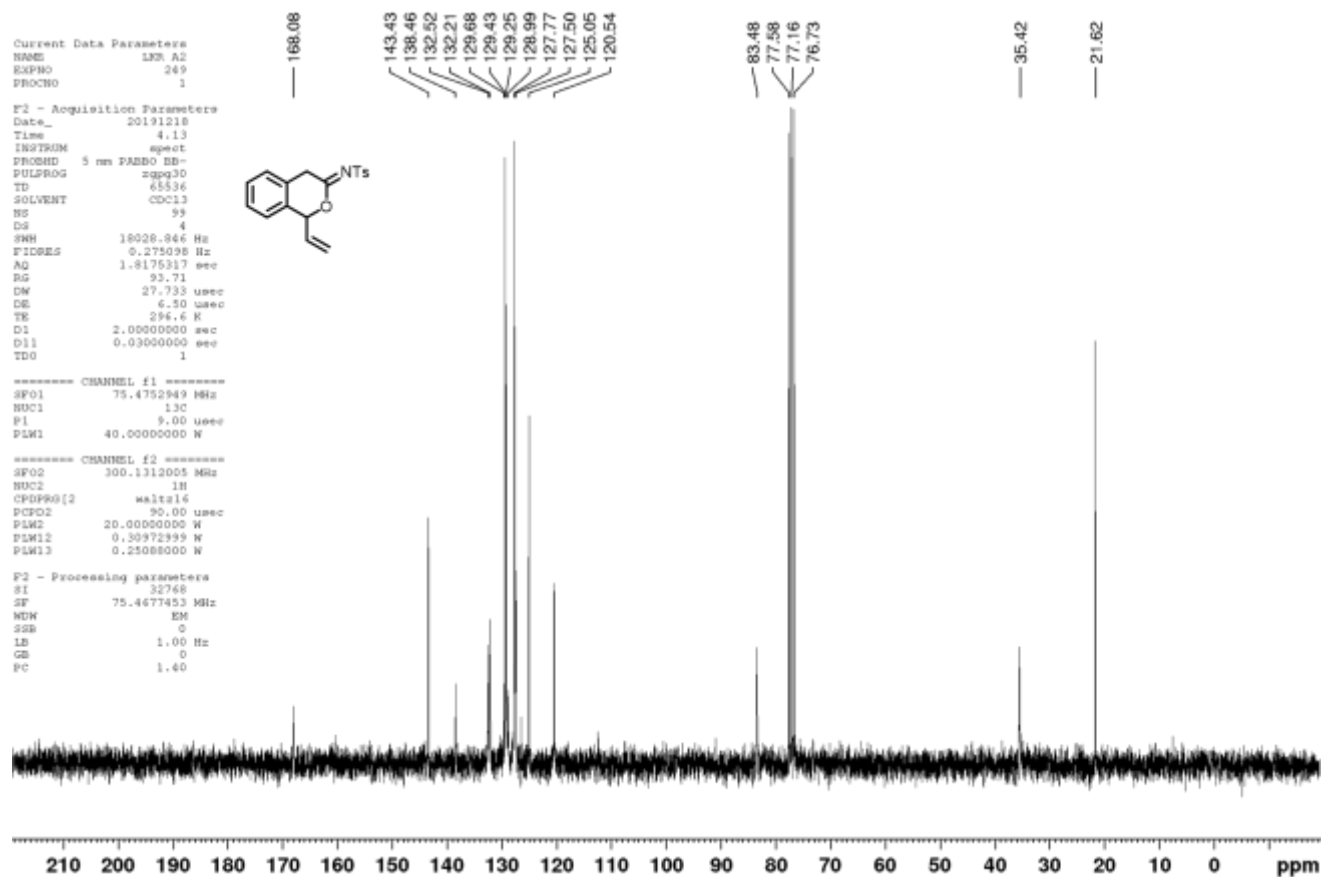



DEPT-135 spectra of compound **4a**

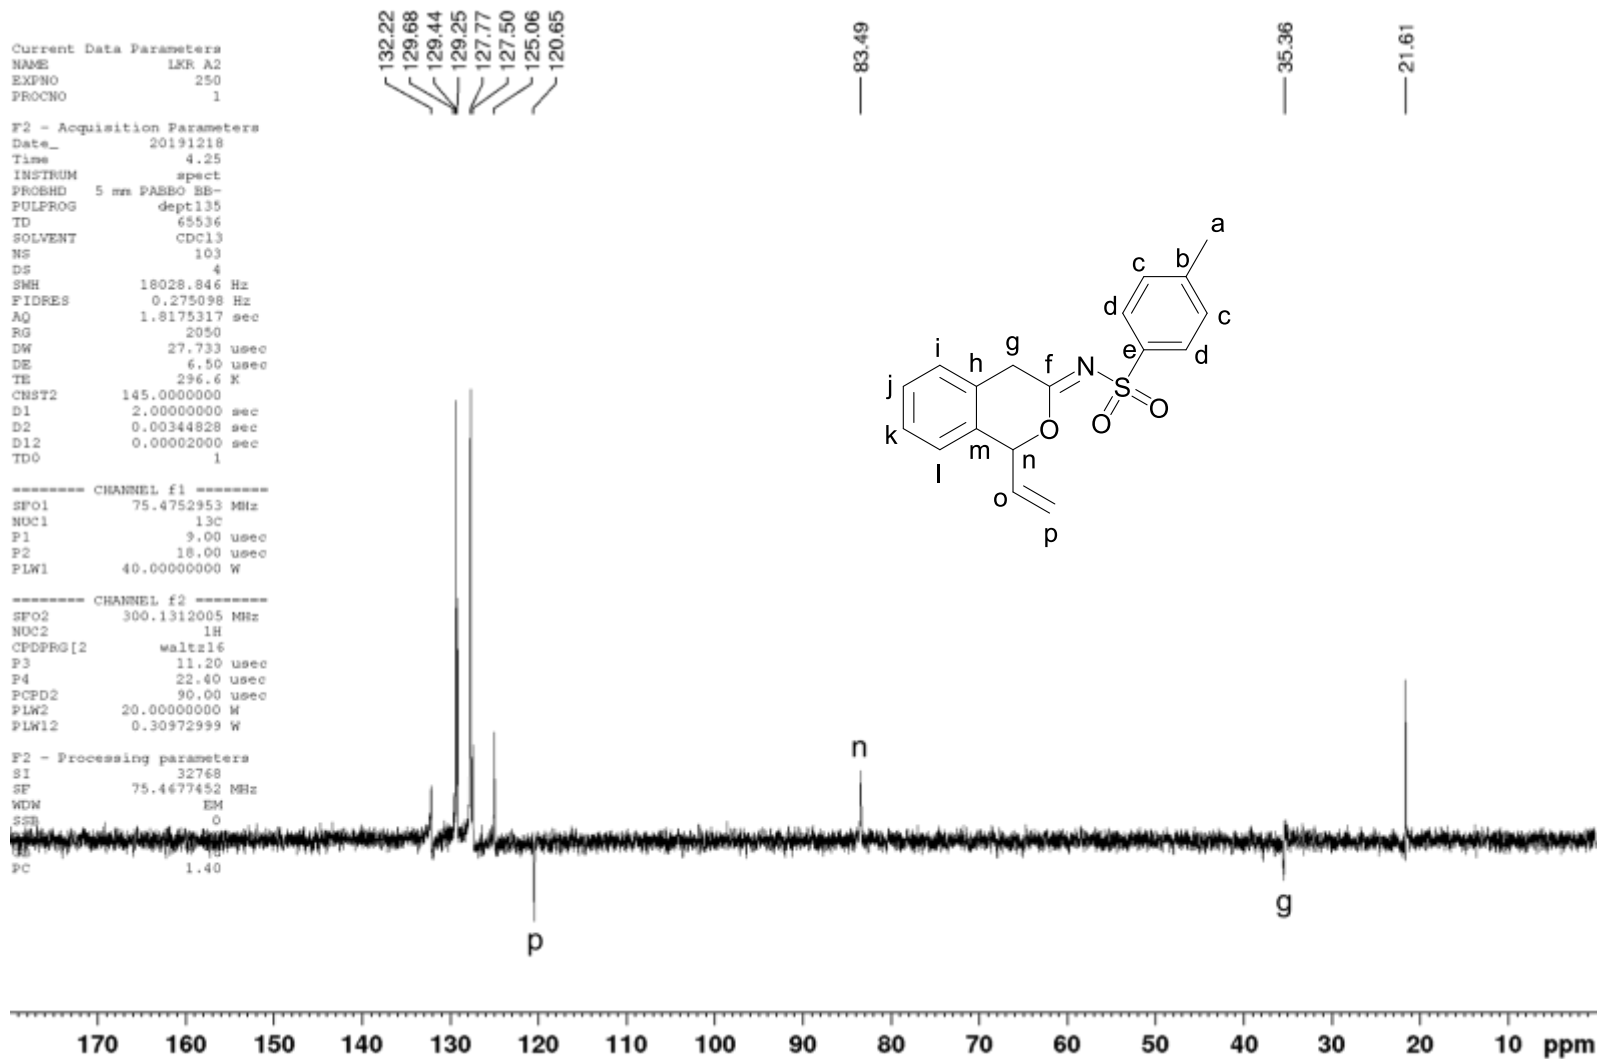

HSQC spectra of compound 4a

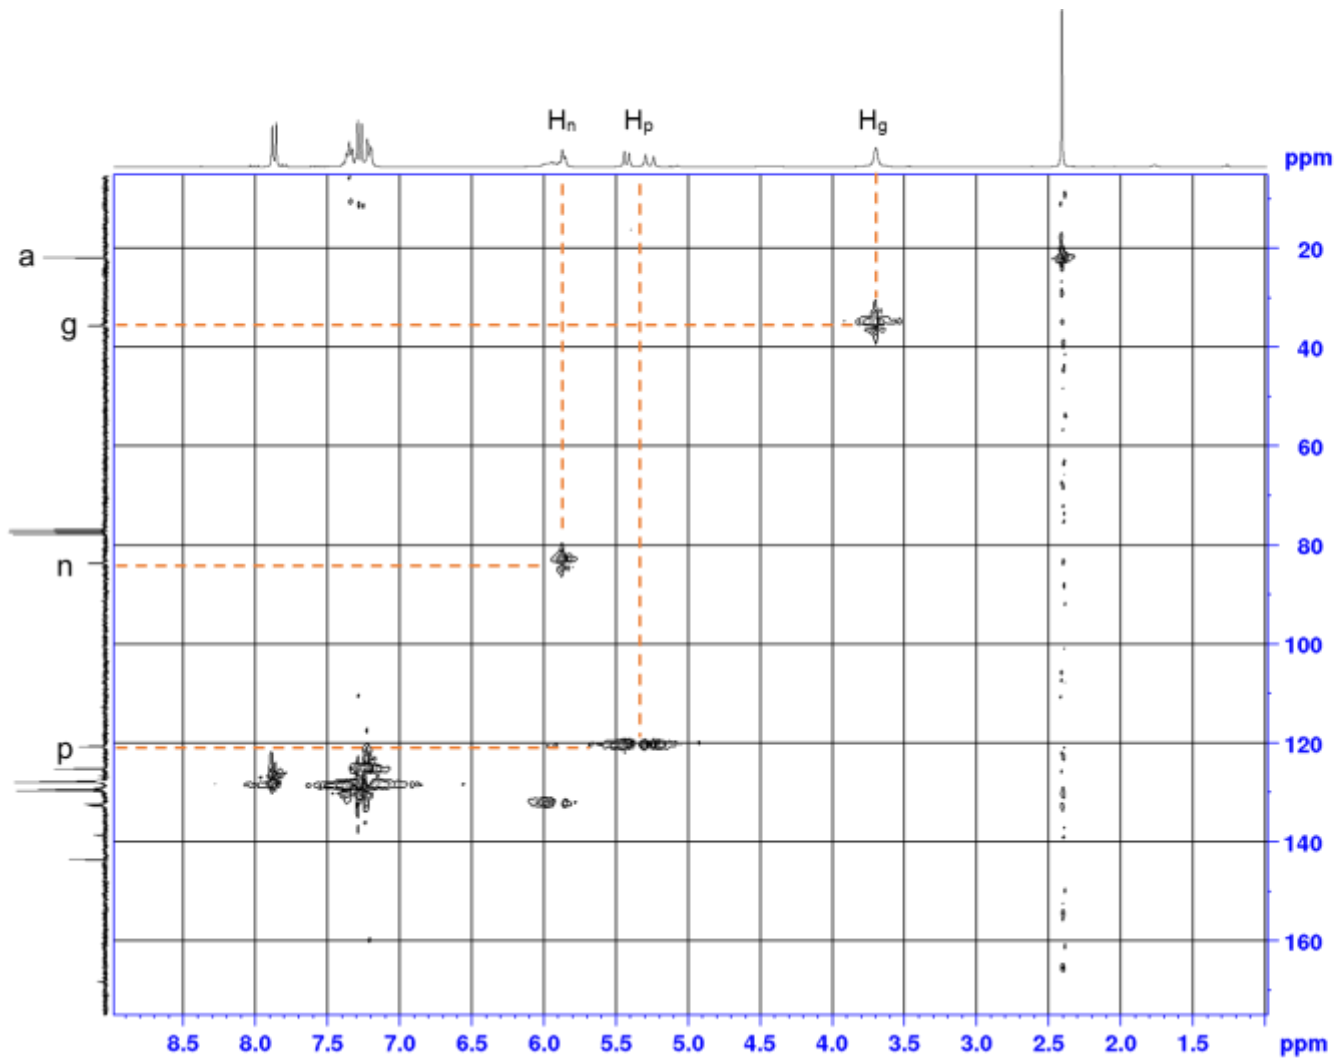

```

===== CHANNEL F1 =====
SF01 300.1315007 MHz
NUC1 13C
P1 13.00 nsec
P2 23.00 nsec
P3 1000.00 nsec
PLW1 20.0000000 W

===== CHANNEL F2 =====
SF02 75.4745411 MHz
NUC2 13C
CPDPRG2 gpgp
P1 5.00 nsec
P2 18.00 nsec
PCPD2 80.00 nsec
PLW2 40.0000000 W
PLW3 0.30423002 W

===== GRADIENT CHANNEL =====
GPM1(1) 80000.100
GPM1(2) 80000.100
GSL 50.00 %
GSP2 20.10 %
PL4 1000.00 nsec

F1 - Acquisition parameters
TD 128
SF01 75.47454 MHz
FIDRES 207.43262 Hz
AQ 149.800 ppm
F4MODE Echo-Atlas2b

F2 - Processing parameters
SI 1024
SF 300.1300004 MHz
WDW QDRZ
SSB 2
LB 0 Hz
GB 0
PC 1.40

F3 - Processing parameters
SI 1024
SF 300.1300004 MHz
WDW QDRZ
SSB 2
LB 0 Hz
GB 0
    
```

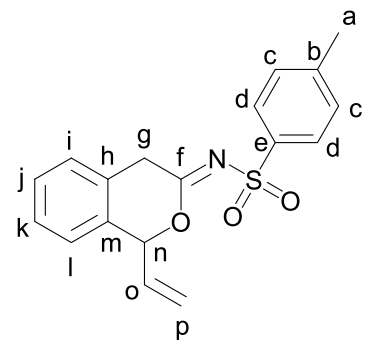

# <sup>1</sup>H spectra of compound 5a

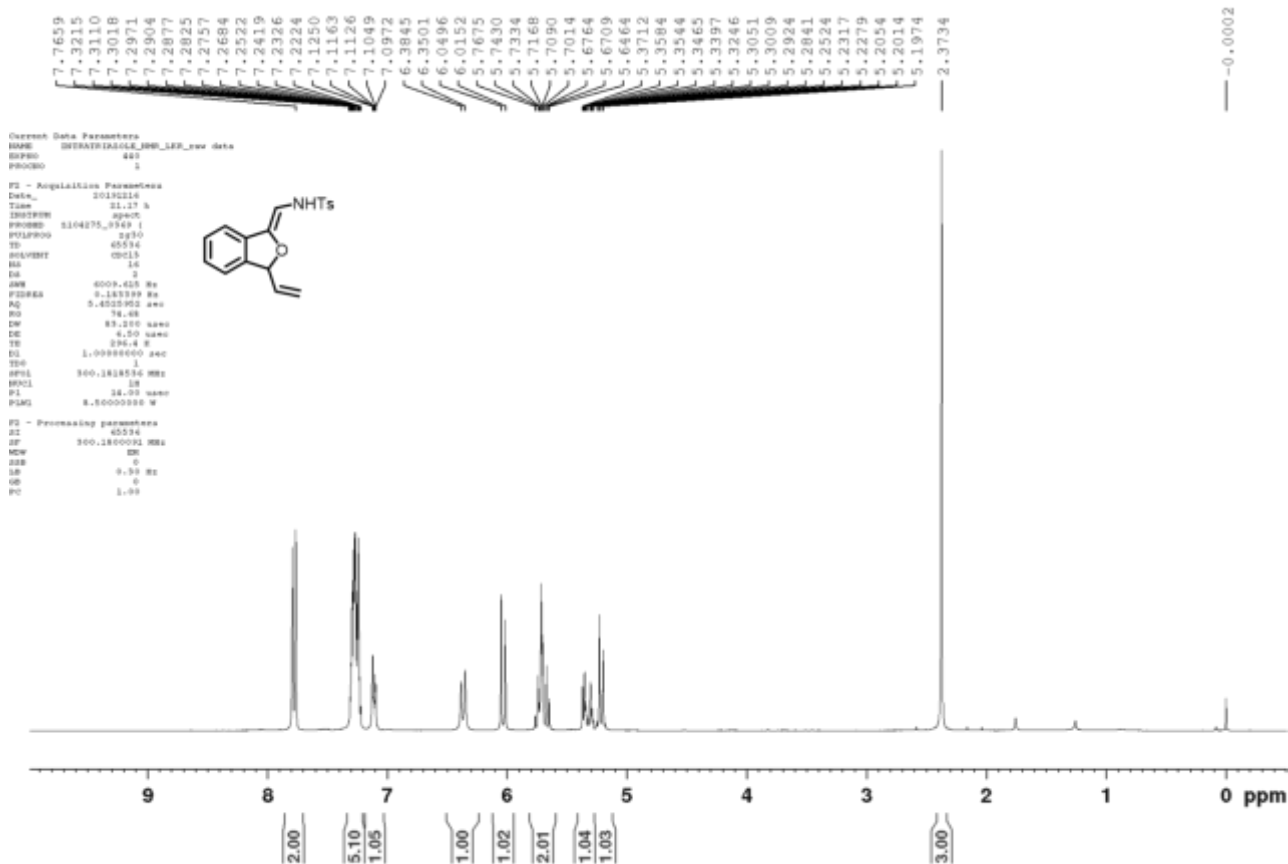

# <sup>13</sup>C spectra of compound 5a

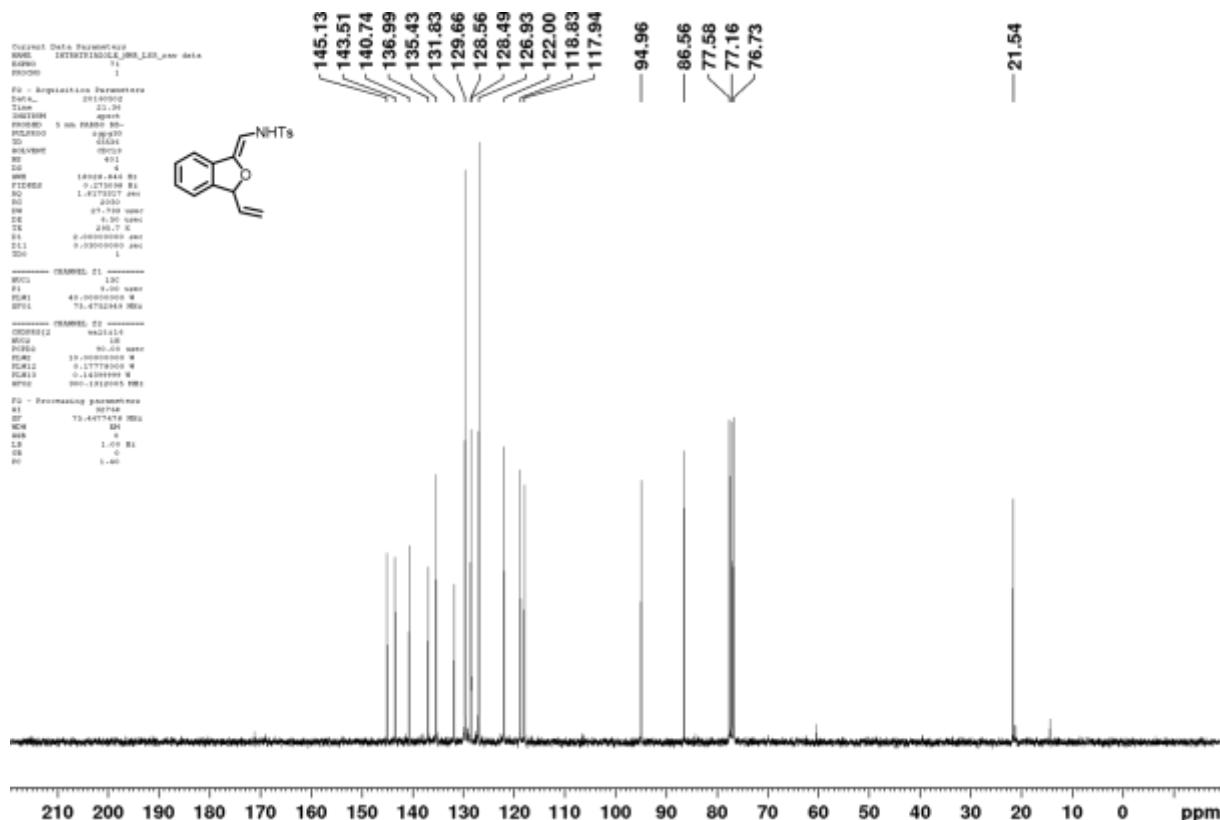

Supplement: d1ob00708d1.pdf [file d1ob00708d1.pdf]
